# Supplementary material
Source: ML conference proceedings conference paper supplement (https://openaccess.thecvf.com/content/CVPR2026/html/Lee_CSF_Black-box_Fingerprinting_CVPR_2026_paper.html)
Supplement: Supplementary file 1 [file Lee_CSF_Black-box_Fingerprinting_CVPR_2026_supplemental.pdf]

# CSF: Black-box Fingerprinting via Compositional Semantics for Text-to-Image Models

## Supplementary Material

### A. Model Selection

#### A.1. Base Models

We include 6 base models representing the most prominent open-source diffusion model families. These models are selected due to their widespread adoption in both research and production environments, making them the primary targets for practical fingerprinting applications.

**Stable Diffusion Family.** The Stable Diffusion series (SD1.5-Base, SD2.1-Base, SD3-Medium-Base, SDXL-Base) represents the dominant lineage in open-source text-to-image generation. SD1.5 [43] established the standard U-Net architecture with latent diffusion, becoming the foundation for thousands of derivatives. SD2.1 introduced architectural improvements including a larger U-Net and OpenCLIP text encoder. SD3 [8] marked a major paradigm shift by adopting a transformer-based backbone similar to DiT [34], while SDXL [36] scaled up model capacity for higher-resolution generation. These four models share the same latent diffusion framework but differ in architecture scale, training data, and design choices, presenting a challenging test for distinguishing models within the same lineage. We additionally include SD1.5-1.2-Base and SD1.5-1.4-Base, intermediate checkpoints from SD1.5’s training trajectory, to evaluate whether fingerprints can differentiate between temporally close versions that share nearly identical architectures and overlapping training data.

**Flux Family.** Flux-Base [23] represents a recent shift toward fully transformer-based architectures, departing from the U-Net paradigm. Its adoption of attention-based processing throughout the model challenges whether fingerprinting methods designed for convolutional architectures can generalize to transformer-native designs.

**Kandinsky Family.** Kandinsky-Base [41] employs a unique two-stage pipeline with separate prior and decoder models, where the prior maps text to image embeddings before the decoder generates pixels. This architectural distinction from single-stage models like Stable Diffusion tests whether fingerprints can adapt to multi-stage generation processes.

The diversity across these base models—spanning U-Net vs. transformer architectures, single-stage vs. two-stage pipelines, and different capacity scales—provides a comprehensive testbed for evaluating cross-architecture fingerprint generalization.

#### A.2. Fine-tuned and Adapted Models

We include 13 fine-tuned variants spanning diverse adaptation strategies to test fingerprint persistence under practical model modifications:

**Parameter-Efficient Fine-Tuning.** Flux-LoRA, Kandinsky-Pokemon-LoRA, SD2.1-DPO, and SDXL-DPO apply LoRA [13] for low-rank adaptation, testing whether fingerprints survive when only a small fraction ( $<1\%$ ) of parameters are modified. The latter two additionally incorporate Direct Preference Optimization [39] for alignment with human preferences, combining parameter efficiency with RLHF-style objectives that may disrupt learned semantic biases.

**Domain-Specific Fine-Tuning.** Kandinsky-Naruto (anime style), SD1.5-DreamShaper (aesthetic quality optimization), and SD2.1-LAION-Art (artistic style from LAION-Aesthetics [46]) undergo substantial fine-tuning on domain-specific data. These models challenge fingerprint robustness under significant distribution shift, where the semantic space may deviate considerably from the base model’s training distribution.

**Model Merging.** SD1.5-DreamShaper and SD3-Reality-Mix represent community-created models that interpolate or merge weights from multiple checkpoints to achieve desired aesthetic or photorealistic qualities. Weight merging presents a unique challenge as the resulting model’s semantic space is a non-linear combination of its constituent models, potentially diluting or obscuring individual model fingerprints.

**Component-Specific Modification.** SD3-VAE-Anime fine-tunes only the VAE decoder while keeping the diffusion model frozen, isolating the impact of decoder modifications on fingerprinting. This tests whether fingerprints embedded in the semantic (latent) space persist when only the pixel-space decoder is modified.

**Inference Optimization.** Flux-Turbo-Alpha and SDXL-Lightning-4Step are distilled for few-step inference (4-8 steps vs. 50+ steps), representing the most extreme adaptation scenario. These models undergo aggressive knowledge distillation and inference optimization that fundamentally alters the denoising trajectory. Crucially, such distillation has been shown to defeat even white-box watermarking methods [56], making it the hardest case for any fingerprinting approach. Our evaluation on these models tests whether semantic fingerprints can survive optimization pressures that eliminate traditional cryptographic signatures.

This comprehensive selection ensures our evaluation covers the practical challenges faced in real-world model fingerprinting, from lightweight adaptations to aggressive compression and merging strategies.

## B. Results with Alternative Metrics

We evaluate our fingerprinting approach using alternative distance metrics to validate robustness. Results are reported at 95% confidence intervals.

### B.1. Baseline Clustering Methods

Table A3 and Table A4 show results for hierarchical clustering on raw fingerprint vectors. Without model specifications (Table A3), naive clustering fails to achieve reliable fingerprinting due to high false positive rates. Incorporating specifications (Table A4) improves performance but still underperforms our compositional approach, confirming that how we structure semantic biases matters.

### B.2. Jensen-Shannon Divergence

Table A7, Table A6, and Table A5 present JSD-based fingerprinting results. While JSD is a principled distribution metric, it struggles to capture the subtle compositional structure of semantic biases:

- JSD treats all fingerprint dimensions equally, missing compositionally-structured patterns
- Smoothing in JSD computation reduces discriminability at decision boundaries
- Higher variance in confidence intervals suggests less stable matching

These results explain why LPIPS, designed for perceptual differences, outperforms distribution-based metrics. Our compositional prompts produce semantically meaningful visual variations that may appear statistically minor under symmetric divergence measures.

## C. Fingerprinting Prompt Templates

### C.1. Prompt Design Rationale

Our 42 fingerprinting prompts are designed to systematically probe semantic biases across multiple dimensions:

**Compositional structure** All prompts follow the template "A photo of a [ADJECTIVE] [OBJECT] [LOCATION]", which allows independent manipulation of each semantic component. This compositionality is crucial for isolating specific bias sources and measuring their persistence through fine-tuning.

**Attribute variation** Each object category includes three semantically distinct adjectives that probe different semantic associations. For example, baked goods vary along the savory-sweet spectrum (savory, cheesy, sweet), while animals vary in perceived threat level (dangerous, wild, peaceful). This diversity ensures we capture a broad range of potential semantic biases.

**Context variation** We systematically vary background settings across three types: controlled studio environments (dimmed studio), natural contexts (grassland, forest, grass, savana), and textured surfaces (dark wood, brick wall, pot, vase, dish, wooden floor). The dimmed studio setting appears across all categories to provide a consistent baseline for cross-category comparison, while category-specific contexts test bias robustness in semantically appropriate settings.

**Coverage and efficiency** The resulting 42 prompts (5 categories  $\times$  3 attributes  $\times$  2-3 contexts) provide sufficient coverage to establish reliable fingerprints while remaining computationally tractable for fingerprinting verification in black-box settings.

## C.2. Prompt Template Structure

Table A8 summarizes the compositional structure of our fingerprinting prompts. The full enumeration of all 42 prompts is provided in Section G.3.

## D. Hyperparameter Settings

- **Standard Diffusion Models (SD1.5, SD2.1, SDXL Base):** We used a unified setting of **30 inference steps** and a **guidance scale (CFG) of 7.5**. This applies to the majority of fine-tuned models in our benchmark (e.g., DreamShaper, LAION-Art).
- **SDXL-Lightning:** As this model is distilled for extreme speed, we used **4 inference steps** with a **guidance scale of 0.0**, utilizing the `EulerDiscreteScheduler` with trailing timesteps.
- **Stable Diffusion 3 (SD3):** For the base medium model, we used **28 steps** with a CFG of **7.0**. For the *Reality Mix* variant, we lowered the CFG to **5.5** and set the guidance rescale to 0.0 to prevent artifacts.
- **Flux.1-dev:** We utilized the `FluxPipeline` with **50 inference steps** and a **guidance scale of 3.5**. The generation resolution was explicitly set to  $512 \times 512$ , and for LoRA variants (e.g., RealismLora), adapter weights were loaded with a scale of 1.0.
- **DPO-Adapted Models:** For SD2.1-DPO and SDXL-DPO, we switched the scheduler to `DPMSolverMultistepScheduler` (SDE-DPM++ with Karras sigmas) to better handle the preference-aligned weights. The LoRA adapter strength was set to **0.9**.
- **Kandinsky 2.2:** We employed the specific `KandinskyV22PriorPipeline` for embedding generation (CFG 1.0), followed by the decoder pipeline.

## E. Visualization

Figures B9 and B10 show the results when generated with our prompts, and Figures B3 to B6 present example questions used in the human study.

## F. Heatmap

In Table A2, similar to other fingerprinting methods, our method can also be evaluated by visualizing a heatmap. We visualized the results by averaging each column.

## G. Details of the Analysis experiments

### G.1. Details of the Scene-Context Validation Experiment

We provide the full protocol for the scene-context validation experiment shown in Figure 5. The goal of this experiment was to verify that the semantic signal isolated by CSF changes systematically when only the contextual component of an underspecified prompt is modified.

**Task.** We instantiated the validation experiment in the fruit domain. For each trial, we fixed the superordinate category and the underspecified component of the prompt, and varied only the scene context. We considered three contextual settings: *dimmed studio*, *dish*, and *wooden floor*.

**Prompt conditions.** All prompt components other than the scene phrase were kept unchanged across conditions. This design isolates the effect of context alone, allowing us to test whether a single contextual modification can induce a measurable shift in the generated semantic category distribution.

**Protocol.** For each context, we generated 40 images using the same model and identical sampling settings. The generation pipeline, including the prompt template and all sampling hyperparameters, was kept fixed across the three conditions.

**Category extraction.** Each generated image was mapped to a fixed fruit-category vocabulary using the same zero-shot CLIP-based category extraction procedure used throughout the main experiments. The category set consisted of Apple, Nectarine, Grapefruit, Lime, Coconut, Honeydew, and Others.

**Interpretation.** As shown in Figure 5, changing only the scene context produces a substantial and systematic shift in the generated category distribution. Compared with the dimmed-studio setting, the dish and wooden-floor settings yield broader and differently redistributed mixtures over categories. This supports our claim that compositional underspecification reveals model-dependent semantic biases, and that contextual variation alone is sufficient to alter how the model resolves semantic ambiguity.

## G.2. Details of the Human Perceptual Study

We provide the full protocol for the human perceptual validation experiment used in Figure 4. The goal of this study was to test whether the semantic signal isolated by CSF is also accessible to human observers, rather than being an artifact of the computational attribution procedure.

**Task.** We ran a four-way forced-choice “Name That Dataset” experiment on Amazon Mechanical Turk. In each trial, a participant was shown a fine-tuned model and asked to identify its underlying base model from four candidates. To mirror the abstraction used by CSF, participants were explicitly instructed to ignore visual style and rely only on recurring content-distribution cues.

**Prompt conditions.** We compared two prompt sources: (i) naive prompts randomly sampled from LAION-2B, and (ii) CSF prompts generated by our method. The candidate set size was fixed across conditions, yielding a chance level of 25%.

**Protocol.** For each condition, we collected responses from 50 independent participants under the same interface and instruction template. Candidate ordering was randomized to reduce position bias, while the task format was kept identical across conditions.

**Metric and error bars.** We report identification accuracy for each condition. Since each response is a binary correct/incorrect outcome, we model the measured accuracy under a binomial distribution and compute the error bars as

$$100\sqrt{\frac{p(1-p)}{n}},$$

where  $p$  is the observed accuracy and  $n = 50$  is the number of independent participant responses.

**Interpretation.** Naive prompts lead to substantially weaker identification performance, whereas CSF prompts noticeably improve human recognition of the correct model lineage. This supports our claim that the signal captured by CSF is not merely machine-readable, but also perceptually robust.

Table A1. Model details for fingerprinting evaluation. All models are available at [https://huggingface.co/\[model-path\]](https://huggingface.co/[model-path]).

| Model Name              | HuggingFace Path                                         |
|-------------------------|----------------------------------------------------------|
| <i>Flux Family</i>      |                                                          |
| Flux-Base               | black-forest-labs/FLUX.1-dev                             |
| Flux-LoRA               | XLabs-AI/flux-RealismLora                                |
| Flux-Turbo-Alpha        | alimama-creative/FLUX.1-Turbo-Alpha                      |
| <i>Kandinsky Family</i> |                                                          |
| Kandinsky-Base          | kandinsky-community/kandinsky-2-2-prior                  |
| Kandinsky-Naruto        | JeonghyunLee/kandi2-prior-naruto-model                   |
| Kandinsky-Pokemon-LoRA  | YiYiXu/pokeman_kandinsky_decoder_lora                    |
| <i>SD1.5 Family</i>     |                                                          |
| SD1.5-Base              | stable-diffusion-v1-5/stable-diffusion-v1-5              |
| SD1.5-1.2-Base          | CompVis/stable-diffusion-v1-2                            |
| SD1.5-1.4-Base          | CompVis/stable-diffusion-v1-4                            |
| SD1.5-DreamShaper       | Lykon/dreamshaper-8                                      |
| <i>SD2.1 Family</i>     |                                                          |
| SD2.1-Base              | stabilityai/stable-diffusion-2-1                         |
| SD2.1-DPO               | radames/sd-21-DPO-LoRA                                   |
| SD2.1-LAION-Art         | Vishnou/sd-laion-art                                     |
| <i>SD3 Family</i>       |                                                          |
| SD3-Medium-Base         | stabilityai/stable-diffusion-3-medium-diffusers          |
| SD3-Reality-Mix         | terminusresearch/stable-diffusion-3.0-medium-reality-mix |
| SD3-VAE-Anime           | Disty0/sd3.vae.anime.ft                                  |
| <i>SDXL Family</i>      |                                                          |
| SDXL-Base               | stabilityai/stable-diffusion-xl-base-1.0                 |
| SDXL-DPO                | radames/sd-xl-DPO-LoRA                                   |
| SDXL-Lightning-4Step    | ByteDance/SDXL-Lightning                                 |

Table A2. Average Normalized Wasserstein Distance Matrix across all prompts. Each value is the mean of column-normalized distances across all 42 prompts. ■ Short, ■ Medium-low, ■ Medium-high, ■ Long distance.

|           | AVERAGE ACROSS ALL PROMPTS |        |         |        |        |        |          |          |          |           |         |          |         |          |            |           |        |         |          |
|-----------|----------------------------|--------|---------|--------|--------|--------|----------|----------|----------|-----------|---------|----------|---------|----------|------------|-----------|--------|---------|----------|
|           | Flux                       |        |         | Kand   |        |        | SD1.5    |          |          |           | SD2.1   |          | SD3     |          |            | SDXL      |        |         |          |
|           | F-Base                     | F-LoRA | F-Turbo | K-Base | K-Naru | K-Poke | 1.5-v1.2 | 1.5-v1.4 | 1.5-Base | 1.5-Dream | 2.1-DPO | 2.1-Base | 2.1-Art | SD3-Real | SD3-Medium | SD3-Anime | XL-DPO | XL-Base | XL-Light |
| F-Base    | 0.00                       | 0.34   | 0.25    | 0.71   | 0.71   | 0.71   | 0.85     | 0.84     | 0.84     | 0.77      | 0.81    | 0.83     | 0.83    | 0.63     | 0.65       | 0.66      | 0.78   | 0.79    | 0.73     |
| F-LoRA    | 0.33                       | 0.00   | 0.41    | 0.71   | 0.71   | 0.75   | 0.86     | 0.83     | 0.82     | 0.81      | 0.80    | 0.81     | 0.81    | 0.68     | 0.73       | 0.73      | 0.74   | 0.74    | 0.70     |
| F-Turbo   | 0.24                       | 0.41   | 0.00    | 0.73   | 0.78   | 0.73   | 0.78     | 0.78     | 0.79     | 0.77      | 0.76    | 0.77     | 0.77    | 0.67     | 0.69       | 0.69      | 0.78   | 0.78    | 0.72     |
| K-Base    | 0.67                       | 0.70   | 0.71    | 0.00   | 0.18   | 0.34   | 0.79     | 0.83     | 0.83     | 0.78      | 0.81    | 0.79     | 0.79    | 0.78     | 0.78       | 0.78      | 0.65   | 0.65    | 0.63     |
| K-Naru    | 0.67                       | 0.70   | 0.73    | 0.15   | 0.00   | 0.35   | 0.80     | 0.84     | 0.84     | 0.78      | 0.81    | 0.80     | 0.79    | 0.74     | 0.76       | 0.77      | 0.63   | 0.64    | 0.62     |
| K-Poke    | 0.69                       | 0.76   | 0.75    | 0.36   | 0.36   | 0.00   | 0.87     | 0.88     | 0.80     | 0.78      | 0.82    | 0.82     | 0.82    | 0.71     | 0.74       | 0.74      | 0.64   | 0.66    | 0.66     |
| 1.5-v1.2  | 0.91                       | 0.95   | 0.86    | 0.89   | 0.91   | 0.91   | 0.00     | 0.41     | 0.46     | 0.58      | 0.80    | 0.74     | 0.74    | 0.96     | 0.95       | 0.95      | 0.81   | 0.84    | 0.86     |
| 1.5-v1.4  | 0.81                       | 0.82   | 0.79    | 0.83   | 0.84   | 0.81   | 0.57     | 0.00     | 0.34     | 0.51      | 0.67    | 0.63     | 0.63    | 0.73     | 0.81       | 0.81      | 0.77   | 0.75    | 0.79     |
| 1.5-Base  | 0.78                       | 0.79   | 0.77    | 0.80   | 0.80   | 0.81   | 0.39     | 0.33     | 0.00     | 0.50      | 0.66    | 0.62     | 0.62    | 0.76     | 0.79       | 0.79      | 0.74   | 0.72    | 0.75     |
| 1.5-Dream | 0.80                       | 0.85   | 0.82    | 0.84   | 0.85   | 0.81   | 0.55     | 0.55     | 0.56     | 0.00      | 0.80    | 0.80     | 0.80    | 0.77     | 0.84       | 0.84      | 0.82   | 0.80    | 0.80     |
| 2.1-DPO   | 0.75                       | 0.77   | 0.74    | 0.79   | 0.78   | 0.76   | 0.69     | 0.65     | 0.66     | 0.72      | 0.00    | 0.26     | 0.28    | 0.64     | 0.71       | 0.72      | 0.74   | 0.73    | 0.78     |
| 2.1-Base  | 0.79                       | 0.79   | 0.77    | 0.80   | 0.80   | 0.79   | 0.65     | 0.63     | 0.64     | 0.73      | 0.25    | 0.00     | 0.02    | 0.67     | 0.74       | 0.74      | 0.75   | 0.74    | 0.80     |
| 2.1-Art   | 0.79                       | 0.79   | 0.77    | 0.79   | 0.79   | 0.78   | 0.65     | 0.62     | 0.63     | 0.72      | 0.26    | 0.02     | 0.00    | 0.67     | 0.74       | 0.74      | 0.75   | 0.74    | 0.79     |
| SD3-Real  | 0.73                       | 0.78   | 0.80    | 0.97   | 0.92   | 0.87   | 0.84     | 0.86     | 0.97     | 0.85      | 0.82    | 0.84     | 0.84    | 0.00     | 0.54       | 0.53      | 0.81   | 0.82    | 0.87     |
| SD3-Base  | 0.59                       | 0.67   | 0.63    | 0.73   | 0.72   | 0.68   | 0.78     | 0.75     | 0.76     | 0.73      | 0.68    | 0.68     | 0.68    | 0.40     | 0.00       | 0.00      | 0.64   | 0.65    | 0.67     |
| SD3-Anime | 0.59                       | 0.68   | 0.63    | 0.73   | 0.72   | 0.67   | 0.78     | 0.75     | 0.76     | 0.73      | 0.67    | 0.68     | 0.68    | 0.40     | 0.00       | 0.00      | 0.64   | 0.65    | 0.67     |
| XL-DPO    | 0.68                       | 0.67   | 0.71    | 0.59   | 0.57   | 0.56   | 0.70     | 0.71     | 0.71     | 0.70      | 0.69    | 0.68     | 0.68    | 0.59     | 0.62       | 0.63      | 0.00   | 0.18    | 0.36     |
| XL-Base   | 0.71                       | 0.69   | 0.74    | 0.61   | 0.59   | 0.61   | 0.69     | 0.71     | 0.71     | 0.71      | 0.71    | 0.70     | 0.70    | 0.62     | 0.66       | 0.66      | 0.19   | 0.00    | 0.36     |
| XL-Light  | 0.67                       | 0.67   | 0.70    | 0.60   | 0.59   | 0.63   | 0.70     | 0.75     | 0.75     | 0.72      | 0.77    | 0.75     | 0.75    | 0.67     | 0.69       | 0.69      | 0.37   | 0.36    | 0.00     |

| Prompt: "A photo of a cheesy baked good on a dimmed studio" |                                                                                     |                                                                                     |                                                                                     |                                                                                     |                                                                                     |                                                                                      |                                                                                       |                                                                                       |                                                                                       |                                                                                       |
|-------------------------------------------------------------|-------------------------------------------------------------------------------------|-------------------------------------------------------------------------------------|-------------------------------------------------------------------------------------|-------------------------------------------------------------------------------------|-------------------------------------------------------------------------------------|--------------------------------------------------------------------------------------|---------------------------------------------------------------------------------------|---------------------------------------------------------------------------------------|---------------------------------------------------------------------------------------|---------------------------------------------------------------------------------------|
| Model                                                       | S1                                                                                  | S2                                                                                  | S3                                                                                  | S4                                                                                  | S5                                                                                  | S6                                                                                   | S7                                                                                    | S8                                                                                    | S9                                                                                    | S10                                                                                   |
| <i>Flux Family</i>                                          |                                                                                     |                                                                                     |                                                                                     |                                                                                     |                                                                                     |                                                                                      |                                                                                       |                                                                                       |                                                                                       |                                                                                       |
| Flux-Base                                                   |    |    |    |    |    |    |    |    |    |    |
| Flux-LoRA                                                   |    |    |    |    |    |    |    |    |    |    |
| Flux-Turbo-Alpha                                            |    |    |    |    |    |    |    |    |    |    |
| <i>Kandinsky Family</i>                                     |                                                                                     |                                                                                     |                                                                                     |                                                                                     |                                                                                     |                                                                                      |                                                                                       |                                                                                       |                                                                                       |                                                                                       |
| Kandinsky-Base                                              |    |    |    |    |    |    |    |    |    |    |
| Kandinsky-Naruto                                            |   |   |   |   |   |   |   |   |   |   |
| Kandinsky-Pokemon-LoRA                                      |  |  |  |  |  |  |  |  |  |  |
| <i>SD1.5 Family</i>                                         |                                                                                     |                                                                                     |                                                                                     |                                                                                     |                                                                                     |                                                                                      |                                                                                       |                                                                                       |                                                                                       |                                                                                       |
| SD1.5-Base                                                  |  |  |  |  |  |  |  |  |  |  |
| SD1.5-1.2-Base                                              |  |  |  |  |  |  |  |  |  |  |
| SD1.5-1.4-Base                                              |  |  |  |  |  |  |  |  |  |  |
| SD1.5-DreamShaper                                           |  |  |  |  |  |  |  |  |  |  |

Figure B1. Qualitative results (Part 1): Flux, Kandinsky, and SD1.5 families.

| Model                | Prompt: "A photo of a cheesy baked good on a dimmed studio"                         |                                                                                     |                                                                                     |                                                                                     |                                                                                     |                                                                                      |                                                                                       |                                                                                       |                                                                                       |                                                                                       |
|----------------------|-------------------------------------------------------------------------------------|-------------------------------------------------------------------------------------|-------------------------------------------------------------------------------------|-------------------------------------------------------------------------------------|-------------------------------------------------------------------------------------|--------------------------------------------------------------------------------------|---------------------------------------------------------------------------------------|---------------------------------------------------------------------------------------|---------------------------------------------------------------------------------------|---------------------------------------------------------------------------------------|
|                      | S1                                                                                  | S2                                                                                  | S3                                                                                  | S4                                                                                  | S5                                                                                  | S6                                                                                   | S7                                                                                    | S8                                                                                    | S9                                                                                    | S10                                                                                   |
| <i>SD2.1 Family</i>  |                                                                                     |                                                                                     |                                                                                     |                                                                                     |                                                                                     |                                                                                      |                                                                                       |                                                                                       |                                                                                       |                                                                                       |
| SD2.1-Base           |    |    |    |    |    |    |    |    |    |    |
| SD2.1-DPO            |    |    |    |    |    |    |    |    |    |    |
| SD2.1-LAION-Art      |    |    |    |    |    |    |    |    |    |    |
| <i>SD3 Family</i>    |                                                                                     |                                                                                     |                                                                                     |                                                                                     |                                                                                     |                                                                                      |                                                                                       |                                                                                       |                                                                                       |                                                                                       |
| SD3-Medium-Base      |   |   |   |   |   |   |   |   |   |   |
| SD3-Reality-Mix      |  |  |  |  |  |  |  |  |  |  |
| SD3-VAE-Anime        |  |  |  |  |  |  |  |  |  |  |
| <i>SDXL Family</i>   |                                                                                     |                                                                                     |                                                                                     |                                                                                     |                                                                                     |                                                                                      |                                                                                       |                                                                                       |                                                                                       |                                                                                       |
| SDXL-Base            |  |  |  |  |  |  |  |  |  |  |
| SDXL-DPO             |  |  |  |  |  |  |  |  |  |  |
| SDXL-Lightning-4Step |  |  |  |  |  |  |  |  |  |  |

Figure B2. Qualitative results (Part 2): SD2.1, SD3, and SDXL families.

Table A3. 95% Confidence Interval Lower Bound of the Derived Models with base method

|                               | Base Models |                |            |            |                 |           |
|-------------------------------|-------------|----------------|------------|------------|-----------------|-----------|
|                               | Flux-Base   | Kandinsky-Base | SD1.5-Base | SD2.1-Base | SD3-Medium-Base | SDXL-Base |
| <i>Flux Family</i>            |             |                |            |            |                 |           |
| <b>Flux-LoRA</b>              | 0.541       | 0.004          | 0.004      | 0.004      | 0.004           | 0.004     |
| <b>Flux-Turbo-Alpha</b>       | 0.541       | 0.004          | 0.004      | 0.004      | 0.004           | 0.004     |
| <i>Kandinsky Family</i>       |             |                |            |            |                 |           |
| <b>Kandinsky-Naruto</b>       | 0.004       | 0.541          | 0.004      | 0.004      | 0.004           | 0.004     |
| <b>Kandinsky-Pokemon-LoRA</b> | 0.004       | 0.541          | 0.004      | 0.004      | 0.004           | 0.004     |
| <i>SD1.5 Family</i>           |             |                |            |            |                 |           |
| <b>SD1.5-1.2-Base</b>         | 0.004       | 0.004          | 0.223      | 0.004      | 0.004           | 0.118     |
| <b>SD1.5-1.4-Base</b>         | 0.004       | 0.004          | 0.541      | 0.004      | 0.004           | 0.004     |
| <b>SD1.5-DreamShaper</b>      | 0.004       | 0.223          | 0.043      | 0.004      | 0.004           | 0.043     |
| <i>SD2.1 Family</i>           |             |                |            |            |                 |           |
| <b>SD2.1-DPO</b>              | 0.004       | 0.004          | 0.004      | 0.541      | 0.004           | 0.004     |
| <b>SD2.1-LAION-Art</b>        | 0.004       | 0.004          | 0.004      | 0.541      | 0.004           | 0.004     |
| <i>SD3 Family</i>             |             |                |            |            |                 |           |
| <b>SD3-Reality-Mix</b>        | 0.004       | 0.004          | 0.004      | 0.043      | 0.359           | 0.004     |
| <b>SD3-VAE-Anime</b>          | 0.004       | 0.004          | 0.004      | 0.004      | 0.541           | 0.004     |
| <i>SDXL Family</i>            |             |                |            |            |                 |           |
| <b>SDXL-DPO</b>               | 0.004       | 0.004          | 0.004      | 0.004      | 0.004           | 0.541     |
| <b>SDXL-Lightning-4Step</b>   | 0.004       | 0.043          | 0.004      | 0.004      | 0.004           | 0.359     |

Table A4. 95% Confidence Posterior mean of the Derived Models with base method

|                               | Base Models |                |            |            |                 |           |
|-------------------------------|-------------|----------------|------------|------------|-----------------|-----------|
|                               | Flux-Base   | Kandinsky-Base | SD1.5-Base | SD2.1-Base | SD3-Medium-Base | SDXL-Base |
| <i>Flux Family</i>            |             |                |            |            |                 |           |
| <b>Flux-LoRA</b>              | 0.857       | 0.143          | 0.143      | 0.143      | 0.143           | 0.143     |
| <b>Flux-Turbo-Alpha</b>       | 0.857       | 0.143          | 0.143      | 0.143      | 0.143           | 0.143     |
| <i>Kandinsky Family</i>       |             |                |            |            |                 |           |
| <b>Kandinsky-Naruto</b>       | 0.143       | 0.857          | 0.143      | 0.143      | 0.143           | 0.143     |
| <b>Kandinsky-Pokemon-LoRA</b> | 0.143       | 0.857          | 0.143      | 0.143      | 0.143           | 0.143     |
| <i>SD1.5 Family</i>           |             |                |            |            |                 |           |
| <b>SD1.5-1.2-Base</b>         | 0.143       | 0.143          | 0.571      | 0.143      | 0.143           | 0.429     |
| <b>SD1.5-1.4-Base</b>         | 0.143       | 0.143          | 0.857      | 0.143      | 0.143           | 0.143     |
| <b>SD1.5-DreamShaper</b>      | 0.143       | 0.571          | 0.286      | 0.143      | 0.143           | 0.286     |
| <i>SD2.1 Family</i>           |             |                |            |            |                 |           |
| <b>SD2.1-DPO</b>              | 0.143       | 0.143          | 0.143      | 0.857      | 0.143           | 0.143     |
| <b>SD2.1-LAION-Art</b>        | 0.143       | 0.143          | 0.143      | 0.857      | 0.143           | 0.143     |
| <i>SD3 Family</i>             |             |                |            |            |                 |           |
| <b>SD3-Reality-Mix</b>        | 0.143       | 0.143          | 0.143      | 0.286      | 0.714           | 0.143     |
| <b>SD3-VAE-Anime</b>          | 0.143       | 0.143          | 0.143      | 0.143      | 0.857           | 0.143     |
| <i>SDXL Family</i>            |             |                |            |            |                 |           |
| <b>SDXL-DPO</b>               | 0.143       | 0.143          | 0.143      | 0.143      | 0.143           | 0.857     |
| <b>SDXL-Lightning-4Step</b>   | 0.143       | 0.286          | 0.143      | 0.143      | 0.143           | 0.714     |

Table A5. 95% Confidence Interval Lower Bound of the Derived Models with our method

|                               | Base Models |                |            |            |                 |           |
|-------------------------------|-------------|----------------|------------|------------|-----------------|-----------|
|                               | Flux-Base   | Kandinsky-Base | SD1.5-Base | SD2.1-Base | SD3-Medium-Base | SDXL-Base |
| <i>Flux Family</i>            |             |                |            |            |                 |           |
| <b>Flux-LoRA</b>              | 0.842       | 0.001          | 0.001      | 0.001      | 0.001           | 0.015     |
| <b>Flux-Turbo-Alpha</b>       | 0.918       | 0.001          | 0.001      | 0.001      | 0.001           | 0.001     |
| <i>Kandinsky Family</i>       |             |                |            |            |                 |           |
| <b>Kandinsky-Naruto</b>       | 0.001       | 0.918          | 0.001      | 0.001      | 0.001           | 0.001     |
| <b>Kandinsky-Pokemon-LoRA</b> | 0.006       | 0.702          | 0.006      | 0.028      | 0.001           | 0.006     |
| <i>SD1.5 Family</i>           |             |                |            |            |                 |           |
| <b>SD1.5-1.2-Base</b>         | 0.001       | 0.001          | 0.721      | 0.039      | 0.001           | 0.015     |
| <b>SD1.5-1.4-Base</b>         | 0.001       | 0.001          | 0.918      | 0.001      | 0.001           | 0.001     |
| <b>SD1.5-DreamShaper</b>      | 0.026       | 0.015          | 0.515      | 0.006      | 0.015           | 0.068     |
| <i>SD2.1 Family</i>           |             |                |            |            |                 |           |
| <b>SD2.1-DPO</b>              | 0.001       | 0.001          | 0.001      | 0.918      | 0.001           | 0.001     |
| <b>SD2.1-LAION-Art</b>        | 0.001       | 0.001          | 0.001      | 0.918      | 0.001           | 0.001     |
| <i>SD3 Family</i>             |             |                |            |            |                 |           |
| <b>SD3-Reality-Mix</b>        | 0.053       | 0.026          | 0.001      | 0.006      | 0.563           | 0.026     |
| <b>SD3-VAE-Anime</b>          | 0.001       | 0.001          | 0.001      | 0.001      | 0.918           | 0.001     |
| <i>SDXL Family</i>            |             |                |            |            |                 |           |
| <b>SDXL-DPO</b>               | 0.001       | 0.001          | 0.001      | 0.001      | 0.001           | 0.918     |
| <b>SDXL-Lightning-4Step</b>   | 0.001       | 0.026          | 0.001      | 0.015      | 0.001           | 0.749     |

Table A6. 95% Confidence Interval Lower Bound of the Derived Models in jsd

|                               | Base Models |                |            |            |                 |           |
|-------------------------------|-------------|----------------|------------|------------|-----------------|-----------|
|                               | Flux-Base   | Kandinsky-Base | SD1.5-Base | SD2.1-Base | SD3-Medium-Base | SDXL-Base |
| <i>Flux Family</i>            |             |                |            |            |                 |           |
| <b>Flux-LoRA</b>              | 0.640       | 0.001          | 0.015      | 0.006      | 0.026           | 0.026     |
| <b>Flux-Turbo-Alpha</b>       | 0.842       | 0.006          | 0.001      | 0.001      | 0.001           | 0.006     |
| <i>Kandinsky Family</i>       |             |                |            |            |                 |           |
| <b>Kandinsky-Naruto</b>       | 0.015       | 0.291          | 0.118      | 0.053      | 0.015           | 0.068     |
| <b>Kandinsky-Pokemon-LoRA</b> | 0.015       | 0.842          | 0.001      | 0.001      | 0.001           | 0.001     |
| <i>SD1.5 Family</i>           |             |                |            |            |                 |           |
| <b>SD1.5-1.2-Base</b>         | 0.006       | 0.001          | 0.721      | 0.026      | 0.001           | 0.015     |
| <b>SD1.5-1.4-Base</b>         | 0.006       | 0.001          | 0.809      | 0.015      | 0.001           | 0.001     |
| <b>SD1.5-DreamShaper</b>      | 0.026       | 0.026          | 0.515      | 0.039      | 0.001           | 0.039     |
| <i>SD2.1 Family</i>           |             |                |            |            |                 |           |
| <b>SD2.1-DPO</b>              | 0.026       | 0.001          | 0.001      | 0.809      | 0.001           | 0.001     |
| <b>SD2.1-LAION-Art</b>        | 0.006       | 0.001          | 0.001      | 0.877      | 0.001           | 0.001     |
| <i>SD3 Family</i>             |             |                |            |            |                 |           |
| <b>SD3-Reality-Mix</b>        | 0.053       | 0.006          | 0.015      | 0.026      | 0.421           | 0.084     |
| <b>SD3-VAE-Anime</b>          | 0.026       | 0.001          | 0.001      | 0.001      | 0.779           | 0.006     |
| <i>SDXL Family</i>            |             |                |            |            |                 |           |
| <b>SDXL-DPO</b>               | 0.100       | 0.006          | 0.001      | 0.015      | 0.006           | 0.563     |
| <b>SDXL-Lightning-4Step</b>   | 0.053       | 0.006          | 0.006      | 0.026      | 0.006           | 0.588     |

Table A7. Posterior mean of JSD

|                               | Base Models |                |            |            |                 |           |
|-------------------------------|-------------|----------------|------------|------------|-----------------|-----------|
|                               | Flux-Base   | Kandinsky-Base | SD1.5-Base | SD2.1-Base | SD3-Medium-Base | SDXL-Base |
| <i>Flux Family</i>            |             |                |            |            |                 |           |
| <b>Flux-LoRA</b>              | 0.773       | 0.023          | 0.068      | 0.045      | 0.091           | 0.091     |
| <b>Flux-Turbo-Alpha</b>       | 0.932       | 0.045          | 0.023      | 0.023      | 0.023           | 0.045     |
| <i>Kandinsky Family</i>       |             |                |            |            |                 |           |
| <b>Kandinsky-Naruto</b>       | 0.068       | 0.432          | 0.227      | 0.136      | 0.068           | 0.159     |
| <b>Kandinsky-Pokemon-LoRA</b> | 0.068       | 0.932          | 0.023      | 0.023      | 0.023           | 0.023     |
| <i>SD1.5 Family</i>           |             |                |            |            |                 |           |
| <b>SD1.5-1.2-Base</b>         | 0.045       | 0.023          | 0.841      | 0.091      | 0.023           | 0.068     |
| <b>SD1.5-1.4-Base</b>         | 0.045       | 0.023          | 0.909      | 0.068      | 0.023           | 0.023     |
| <b>SD1.5-DreamShaper</b>      | 0.091       | 0.091          | 0.659      | 0.114      | 0.023           | 0.114     |
| <i>SD2.1 Family</i>           |             |                |            |            |                 |           |
| <b>SD2.1-DPO</b>              | 0.091       | 0.023          | 0.023      | 0.909      | 0.023           | 0.023     |
| <b>SD2.1-LAION-Art</b>        | 0.045       | 0.023          | 0.023      | 0.955      | 0.023           | 0.023     |
| <i>SD3 Family</i>             |             |                |            |            |                 |           |
| <b>SD3-Reality-Mix</b>        | 0.136       | 0.045          | 0.068      | 0.091      | 0.568           | 0.182     |
| <b>SD3-VAE-Anime</b>          | 0.091       | 0.023          | 0.023      | 0.023      | 0.886           | 0.045     |
| <i>SDXL Family</i>            |             |                |            |            |                 |           |
| <b>SDXL-DPO</b>               | 0.205       | 0.045          | 0.023      | 0.068      | 0.045           | 0.705     |
| <b>SDXL-Lightning-4Step</b>   | 0.136       | 0.045          | 0.045      | 0.091      | 0.045           | 0.727     |

Question 9 of 11

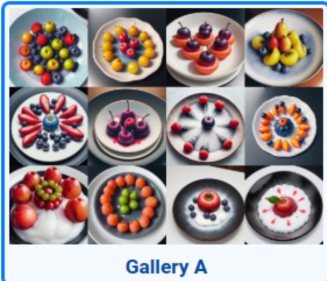

Gallery A

Which gallery (B, C, or D) has the most similar content distribution to Gallery A?



Gallery B



Gallery C



Gallery D

Figure B3. Example of human study

Question 10 of 11

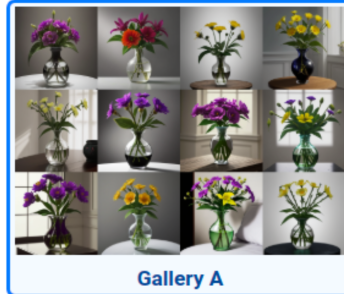

Which gallery (B, C, or D) has the most similar content distribution to Gallery A?

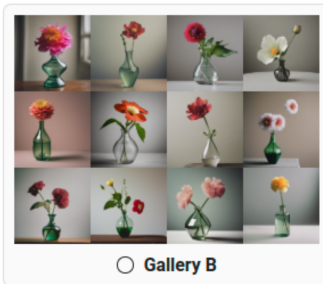

Gallery B

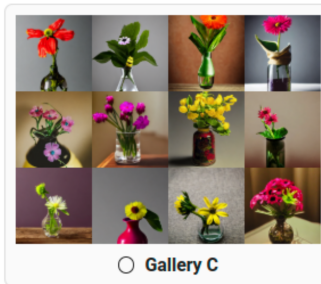

Gallery C

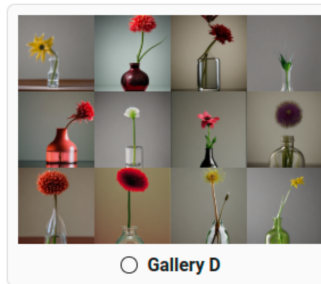

Gallery D

Figure B4. Example of human study

### Task Instructions

You will be shown 11 questions. For each question, you will see one image gallery (Gallery A) and three other galleries (B, C, D).

Gallery A shares a similar 'content distribution pattern' with **only one** of the other galleries (B, C, or D).

#### Your Task:

For each of the 11 questions, please find the gallery (B, C, or D) that has the **most similar 'content distribution pattern'** to Gallery A.

A 'content distribution pattern' means **what is being shown** (e.g., the class of objects/animals) and **their ratios**.

**Please ignore the visual style** (e.g., photo vs. painting, color, mood).

**Note:** This survey includes one screening question (attention check) to ensure data quality. Please read all instructions carefully to ensure your work is approved.

Figure B5. An instruction of human study

**Task Instructions**

You will be shown 11 questions. For each question, you will see one image gallery (Gallery A) and three other galleries (B, C, D). Gallery A shares a similar 'content distribution pattern' with **only one** of the other galleries (B, C, or D).

**Your Task:**

For each of the 11 questions, please find the gallery (B, C, or D) that has the **most similar 'content distribution pattern'** to Gallery A. A 'content distribution pattern' means **what is being shown** (e.g., the class of objects/animals) and **their ratios**. Please ignore the visual style (e.g., photo vs. painting, color, mood).

**Note:** This survey includes one screening question (attention check) to ensure data quality. Please read all instructions carefully to ensure your work is approved.

Figure B6. Example of human study for comparison

| Object Category | Adjectives                      | Locations                                    |
|-----------------|---------------------------------|----------------------------------------------|
| Baked good      | savory, cheesy, sweet           | dimmed studio, dark wood surface, brick wall |
| Animal          | dangerous, wild, peaceful       | grassland, forest, dimmed studio             |
| Flower          | vibrant, tropical               | pot, dimmed studio, vase                     |
| Bird            | peaceful, dangerous, flightless | grass, savana, dimmed studio                 |
| Fruit           | sweet, frozen, savory           | dish, wooden floor, dimmed studio            |

Table A8. Compositional structure of fingerprinting prompts. Each category systematically varies semantic attributes and visual contexts, yielding 42 total prompts (9+9+6+9+9). The dimmed studio setting appears across all categories to enable cross-category comparison.

Table A9. Average Normalized Wasserstein Distance Matrix across all prompts. Each value is the mean of column-normalized distances across all 42 prompts. ■ Short, ■ Medium-low, ■ Medium-high, ■ Long distance.

|           | AVERAGE ACROSS ALL PROMPTS |        |         |        |        |        |          |          |          |           |         |          |         |          |          |          |        |         |          |
|-----------|----------------------------|--------|---------|--------|--------|--------|----------|----------|----------|-----------|---------|----------|---------|----------|----------|----------|--------|---------|----------|
|           | Flux                       |        |         | Kand   |        |        | SD1.5    |          |          |           | SD2.1   |          |         | SD3      |          |          | SDXL   |         |          |
|           | F-Base                     | F-LoRA | F-Turbo | K-Base | K-Naru | K-Poke | 1.5-v1.2 | 1.5-v1.4 | 1.5-Base | 1.5-Dream | 2.1-DPO | 2.1-Base | 2.1-Art | SD3-Real | SD3-Base | SD3-Anim | XL-DPO | XL-Base | XL-Light |
| F-Base    | 0.00                       | 0.34   | 0.25    | 0.71   | 0.71   | 0.71   | 0.85     | 0.84     | 0.84     | 0.77      | 0.81    | 0.83     | 0.83    | 0.63     | 0.65     | 0.66     | 0.78   | 0.79    | 0.73     |
| F-LoRA    | 0.33                       | 0.00   | 0.41    | 0.71   | 0.71   | 0.75   | 0.86     | 0.83     | 0.82     | 0.81      | 0.80    | 0.81     | 0.81    | 0.68     | 0.73     | 0.73     | 0.74   | 0.74    | 0.70     |
| F-Turbo   | 0.24                       | 0.41   | 0.00    | 0.73   | 0.74   | 0.73   | 0.78     | 0.78     | 0.79     | 0.77      | 0.76    | 0.77     | 0.77    | 0.67     | 0.69     | 0.69     | 0.78   | 0.79    | 0.73     |
| K-Base    | 0.67                       | 0.70   | 0.73    | 0.00   | 0.14   | 0.34   | 0.79     | 0.83     | 0.83     | 0.78      | 0.81    | 0.79     | 0.79    | 0.78     | 0.78     | 0.78     | 0.65   | 0.65    | 0.63     |
| K-Naru    | 0.67                       | 0.70   | 0.73    | 0.15   | 0.00   | 0.35   | 0.80     | 0.84     | 0.84     | 0.78      | 0.81    | 0.80     | 0.79    | 0.74     | 0.76     | 0.77     | 0.63   | 0.64    | 0.62     |
| K-Poke    | 0.69                       | 0.76   | 0.75    | 0.36   | 0.36   | 0.00   | 0.87     | 0.88     | 0.89     | 0.78      | 0.82    | 0.82     | 0.82    | 0.71     | 0.74     | 0.74     | 0.64   | 0.66    | 0.66     |
| 1.5-v1.2  | 0.91                       | 0.95   | 0.88    | 0.89   | 0.91   | 0.93   | 0.00     | 0.41     | 0.46     | 0.58      | 0.80    | 0.74     | 0.74    | 0.96     | 0.95     | 0.95     | 0.87   | 0.84    | 0.86     |
| 1.5-v1.4  | 0.81                       | 0.82   | 0.79    | 0.83   | 0.84   | 0.83   | 0.37     | 0.00     | 0.34     | 0.51      | 0.67    | 0.63     | 0.63    | 0.78     | 0.81     | 0.81     | 0.77   | 0.75    | 0.79     |
| 1.5-Base  | 0.78                       | 0.79   | 0.77    | 0.80   | 0.80   | 0.81   | 0.39     | 0.33     | 0.00     | 0.50      | 0.66    | 0.62     | 0.62    | 0.76     | 0.79     | 0.79     | 0.74   | 0.72    | 0.75     |
| 1.5-Dream | 0.80                       | 0.85   | 0.82    | 0.84   | 0.85   | 0.81   | 0.55     | 0.55     | 0.56     | 0.00      | 0.80    | 0.80     | 0.80    | 0.77     | 0.84     | 0.84     | 0.82   | 0.80    | 0.80     |
| 2.1-DPO   | 0.75                       | 0.77   | 0.74    | 0.79   | 0.78   | 0.76   | 0.69     | 0.65     | 0.66     | 0.72      | 0.00    | 0.26     | 0.26    | 0.64     | 0.71     | 0.72     | 0.74   | 0.73    | 0.78     |
| 2.1-Base  | 0.79                       | 0.79   | 0.77    | 0.80   | 0.80   | 0.79   | 0.65     | 0.63     | 0.64     | 0.73      | 0.26    | 0.00     | 0.02    | 0.67     | 0.74     | 0.74     | 0.75   | 0.74    | 0.80     |
| 2.1-Art   | 0.79                       | 0.79   | 0.77    | 0.79   | 0.79   | 0.78   | 0.65     | 0.62     | 0.63     | 0.72      | 0.26    | 0.02     | 0.00    | 0.67     | 0.74     | 0.74     | 0.75   | 0.74    | 0.79     |
| SD3-Real  | 0.73                       | 0.78   | 0.80    | 0.97   | 0.92   | 0.87   | 1.04     | 0.96     | 0.97     | 0.85      | 0.82    | 0.84     | 0.84    | 0.00     | 0.54     | 0.53     | 0.81   | 0.82    | 0.87     |
| SD3-Base  | 0.59                       | 0.67   | 0.63    | 0.73   | 0.72   | 0.68   | 0.78     | 0.75     | 0.76     | 0.73      | 0.68    | 0.68     | 0.68    | 0.40     | 0.00     | 0.00     | 0.64   | 0.65    | 0.67     |
| SD3-Anim  | 0.59                       | 0.68   | 0.63    | 0.73   | 0.72   | 0.67   | 0.78     | 0.75     | 0.76     | 0.73      | 0.67    | 0.68     | 0.68    | 0.40     | 0.00     | 0.00     | 0.64   | 0.65    | 0.67     |
| XL-DPO    | 0.68                       | 0.67   | 0.71    | 0.59   | 0.57   | 0.56   | 0.70     | 0.71     | 0.71     | 0.70      | 0.69    | 0.69     | 0.69    | 0.59     | 0.62     | 0.63     | 0.00   | 0.18    | 0.36     |
| XL-Base   | 0.71                       | 0.69   | 0.74    | 0.61   | 0.59   | 0.61   | 0.69     | 0.71     | 0.71     | 0.71      | 0.71    | 0.70     | 0.70    | 0.62     | 0.66     | 0.66     | 0.19   | 0.00    | 0.36     |
| XL-Light  | 0.67                       | 0.67   | 0.70    | 0.60   | 0.59   | 0.63   | 0.70     | 0.75     | 0.75     | 0.72      | 0.77    | 0.75     | 0.75    | 0.67     | 0.69     | 0.69     | 0.37   | 0.36    | 0.00     |

Table A10. Normalized Wasserstein Distance Matrix. Each column normalized by max distance to base models. ■ Short, ■ Medium-low, ■ Medium-high, ■ Long distance.

| Prompt: A Photo Of A Cheesy Baked Good Against A Brick Wall |        |        |         |        |        |        |          |          |          |           |         |          |         |          |          |          |        |         |          |  |
|-------------------------------------------------------------|--------|--------|---------|--------|--------|--------|----------|----------|----------|-----------|---------|----------|---------|----------|----------|----------|--------|---------|----------|--|
|                                                             | Flux   |        |         | Kand   |        |        | SD1.5    |          |          |           | SD2.1   |          |         | SD3      |          |          | SDXL   |         |          |  |
|                                                             | F-Base | F-LoRA | F-Turbo | K-Base | K-Naru | K-Poke | 1.5-v1.2 | 1.5-v1.4 | 1.5-Base | 1.5-Dream | 2.1-DPO | 2.1-Base | 2.1-Art | SD3-Real | SD3-Base | SD3-Anim | XL-DPO | XL-Base | XL-Light |  |
| F-Base                                                      | 0.00   | 0.15   | 0.15    | 0.96   | 0.96   | 0.96   | 0.47     | 0.30     | 0.36     | 0.29      | 0.93    | 0.94     | 0.94    | 0.35     | 0.39     | 0.42     | 0.50   | 0.42    | 0.37     |  |
| F-LoRA                                                      | 0.14   | 0.00   | 0.19    | 0.86   | 0.87   | 0.83   | 0.46     | 0.29     | 0.35     | 0.32      | 0.75    | 0.79     | 0.79    | 0.26     | 0.32     | 0.34     | 0.40   | 0.36    | 0.29     |  |
| F-Turbo                                                     | 0.15   | 0.21   | 0.00    | 0.98   | 0.99   | 0.97   | 0.40     | 0.27     | 0.33     | 0.30      | 0.93    | 0.92     | 0.93    | 0.34     | 0.39     | 0.43     | 0.49   | 0.40    | 0.35     |  |
| K-Base                                                      | 1.00   | 1.00   | 1.00    | 0.00   | 0.05   | 0.25   | 1.00     | 1.00     | 1.00     | 1.00      | 0.87    | 0.55     | 0.59    | 1.00     | 1.00     | 1.00     | 1.00   | 1.00    | 1.00     |  |
| K-Naru                                                      | 0.94   | 0.94   | 0.94    | 0.05   | 0.00   | 0.22   | 0.93     | 0.94     | 0.93     | 0.93      | 0.80    | 0.52     | 0.56    | 0.93     | 0.92     | 0.92     | 0.90   | 0.92    | 0.92     |  |
| K-Poke                                                      | 0.68   | 0.65   | 0.66    | 0.17   | 0.16   | 0.00   | 0.68     | 0.66     | 0.67     | 0.67      | 0.44    | 0.33     | 0.35    | 0.60     | 0.61     | 0.61     | 0.55   | 0.59    | 0.57     |  |
| 1.5-v1.2                                                    | 0.43   | 0.47   | 0.36    | 0.88   | 0.88   | 0.89   | 0.00     | 0.20     | 0.18     | 0.25      | 0.90    | 0.86     | 0.86    | 0.50     | 0.62     | 0.64     | 0.51   | 0.40    | 0.44     |  |
| 1.5-v1.4                                                    | 0.33   | 0.35   | 0.28    | 1.04   | 1.04   | 1.02   | 0.23     | 0.00     | 0.17     | 0.20      | 0.99    | 1.00     | 1.00    | 0.46     | 0.60     | 0.63     | 0.51   | 0.38    | 0.38     |  |
| 1.5-Base                                                    | 0.37   | 0.41   | 0.33    | 1.00   | 1.00   | 1.00   | 0.20     | 0.16     | 0.00     | 0.18      | 1.00    | 1.00     | 1.00    | 0.47     | 0.63     | 0.66     | 0.48   | 0.36    | 0.38     |  |
| 1.5-Dream                                                   | 0.39   | 0.47   | 0.39    | 1.27   | 1.27   | 1.28   | 0.36     | 0.25     | 0.23     | 0.00      | 1.36    | 1.38     | 1.40    | 0.57     | 0.79     | 0.83     | 0.64   | 0.46    | 0.48     |  |
| 2.1-DPO                                                     | 0.42   | 0.38   | 0.41    | 0.37   | 0.37   | 0.28   | 0.44     | 0.41     | 0.43     | 0.46      | 0.00    | 0.20     | 0.19    | 0.38     | 0.38     | 0.38     | 0.35   | 0.36    | 0.36     |  |
| 2.1-Base                                                    | 0.53   | 0.50   | 0.51    | 0.30   | 0.30   | 0.27   | 0.53     | 0.52     | 0.54     | 0.59      | 0.25    | 0.00     | 0.03    | 0.50     | 0.48     | 0.47     | 0.50   | 0.52    | 0.50     |  |
| 2.1-Art                                                     | 0.51   | 0.48   | 0.49    | 0.31   | 0.31   | 0.27   | 0.51     | 0.50     | 0.52     | 0.57      | 0.23    | 0.03     | 0.00    | 0.48     | 0.45     | 0.45     | 0.48   | 0.49    | 0.48     |  |
| SD3-Real                                                    | 0.28   | 0.24   | 0.27    | 0.77   | 0.77   | 0.68   | 0.44     | 0.34     | 0.36     | 0.34      | 0.67    | 0.71     | 0.71    | 0.00     | 0.24     | 0.25     | 0.26   | 0.25    | 0.19     |  |
| SD3-Base                                                    | 0.26   | 0.23   | 0.26    | 0.63   | 0.63   | 0.58   | 0.45     | 0.37     | 0.40     | 0.39      | 0.56    | 0.56     | 0.55    | 0.20     | 0.00     | 0.00     | 0.32   | 0.31    | 0.26     |  |
| SD3-Anim                                                    | 0.27   | 0.24   | 0.27    | 0.61   | 0.60   | 0.55   | 0.45     | 0.37     | 0.40     | 0.40      | 0.54    | 0.53     | 0.53    | 0.20     | 0.00     | 0.00     | 0.32   | 0.31    | 0.27     |  |
| XL-DPO                                                      | 0.32   | 0.28   | 0.30    | 0.60   | 0.59   | 0.49   | 0.35     | 0.30     | 0.29     | 0.30      | 0.49    | 0.56     | 0.55    | 0.21     | 0.31     | 0.32     | 0.00   | 0.14    | 0.18     |  |
| XL-Base                                                     | 0.32   | 0.30   | 0.30    | 0.73   | 0.71   | 0.64   | 0.33     | 0.26     | 0.26     | 0.26      | 0.62    | 0.69     | 0.69    | 0.23     | 0.36     | 0.37     | 0.17   | 0.00    | 0.19     |  |
| XL-Light                                                    | 0.29   | 0.26   | 0.27    | 0.75   | 0.74   | 0.64   | 0.38     | 0.28     | 0.28     | 0.28      | 0.63    | 0.69     | 0.69    | 0.19     | 0.31     | 0.33     | 0.22   | 0.19    | 0.00     |  |

Table A11. Normalized Wasserstein Distance Matrix. Each column normalized by max distance to base models. ■ Short, ■ Medium-low, ■ Medium-high, ■ Long distance.

| Prompt: A Photo Of A Cheesy Baked Good On A Dark Wood Surface |        |        |         |        |        |        |          |          |          |           |         |          |         |          |          |          |        |         |          |  |
|---------------------------------------------------------------|--------|--------|---------|--------|--------|--------|----------|----------|----------|-----------|---------|----------|---------|----------|----------|----------|--------|---------|----------|--|
|                                                               | Flux   |        |         | Kand   |        |        | SD1.5    |          |          |           | SD2.1   |          |         | SD3      |          |          | SDXL   |         |          |  |
|                                                               | F-Base | F-LoRA | F-Turbo | K-Base | K-Naru | K-Poke | 1.5-v1.2 | 1.5-v1.4 | 1.5-Base | 1.5-Dream | 2.1-DPO | 2.1-Base | 2.1-Art | SD3-Real | SD3-Base | SD3-Anim | XL-DPO | XL-Base | XL-Light |  |
| F-Base                                                        | 0.00   | 0.14   | 0.14    | 1.00   | 1.00   | 1.00   | 0.68     | 0.26     | 0.31     | 0.22      | 0.74    | 0.78     | 0.77    | 0.27     | 0.54     | 0.55     | 1.00   | 1.00    | 1.00     |  |
| F-LoRA                                                        | 0.12   | 0.00   | 0.19    | 0.86   | 0.86   | 0.82   | 0.65     | 0.27     | 0.31     | 0.28      | 0.67    | 0.67     | 0.67    | 0.29     | 0.43     | 0.44     | 0.84   | 0.82    | 0.86     |  |
| F-Turbo                                                       | 0.12   | 0.19   | 0.00    | 0.85   | 0.85   | 0.86   | 0.58     | 0.27     | 0.31     | 0.27      | 0.67    | 0.68     | 0.68    | 0.32     | 0.51     | 0.52     | 0.83   | 0.82    | 0.85     |  |
| K-Base                                                        | 1.00   | 1.00   | 1.00    | 0.00   | 0.04   | 0.27   | 1.00     | 1.00     | 1.00     | 1.00      | 1.00    | 1.00     | 1.00    | 1.00     | 1.00     | 1.00     | 0.38   | 0.50    | 0.71     |  |
| K-Naru                                                        | 1.02   | 1.03   | 1.02    | 0.04   | 0.00   | 0.29   | 1.00     | 1.00     | 0.99     | 1.00      | 1.00    | 1.01     | 1.01    | 1.00     | 0.99     | 0.99     | 0.38   | 0.50    | 0.71     |  |
| K-Poke                                                        | 0.59   | 0.57   | 0.59    | 0.16   | 0.16   | 0.00   | 0.66     | 0.59     | 0.60     | 0.63      | 0.43    | 0.45     | 0.45    | 0.63     | 0.57     | 0.57     | 0.24   | 0.28    | 0.38     |  |
| 1.5-v1.2                                                      | 0.42   | 0.47   | 0.42    | 0.61   | 0.60   | 0.68   | 0.00     | 0.32     | 0.31     | 0.40      | 0.59    | 0.55     | 0.55    | 0.56     | 0.65     | 0.65     | 0.54   | 0.54    | 0.62     |  |
| 1.5-v1.4                                                      | 0.24   | 0.30   | 0.30    | 0.93   | 0.91   | 0.94   | 0.48     | 0.00     | 0.18     | 0.20      | 0.60    | 0.63     | 0.63    | 0.29     | 0.53     | 0.54     | 0.83   | 0.82    | 0.88     |  |
| 1.5-Base                                                      | 0.28   | 0.34   | 0.33    | 0.92   | 0.89   | 0.93   | 0.46     | 0.17     | 0.00     | 0.21      | 0.57    | 0.61     | 0.60    | 0.33     | 0.60     | 0.61     | 0.81   | 0.80    | 0.85     |  |
| 1.5-Dream                                                     | 0.34   | 0.48   | 0.48    | 1.50   | 1.46   | 1.61   | 0.97     | 0.32     | 0.34     | 0.00      | 1.10    | 1.24     | 1.22    | 0.21     | 0.87     | 0.89     | 1.47   | 1.51    | 1.59     |  |
| 2.1-DPO                                                       | 0.36   | 0.38   | 0.38    | 0.48   | 0.47   | 0.35   | 0.47     | 0.31     | 0.30     | 0.36      | 0.00    | 0.18     | 0.18    | 0.39     | 0.44     | 0.44     | 0.35   | 0.35    | 0.35     |  |
| 2.1-Base                                                      | 0.36   | 0.36   | 0.37    | 0.46   | 0.46   | 0.35   | 0.42     | 0.31     | 0.31     | 0.38      | 0.17    | 0.00     | 0.01    | 0.42     | 0.44     | 0.44     | 0.33   | 0.32    | 0.32     |  |
| 2.1-Art                                                       | 0.36   | 0.37   | 0.37    | 0.47   | 0.46   | 0.36   | 0.42     | 0.31     | 0.31     | 0.38      | 0.18    | 0.01     | 0.00    | 0.42     | 0.44     | 0.44     | 0.33   | 0.32    | 0.32     |  |
| SD3-Real                                                      | 0.45   | 0.57   | 0.63    | 1.69   | 1.65   | 1.81   | 1.58     | 0.52     | 0.61     | 0.24      | 1.36    | 1.54     | 1.83    | 0.00     | 0.86     | 0.88     | 1.71   | 1.78    | 1.80     |  |
| SD3-Base                                                      | 0.34   | 0.32   | 0.38    | 0.63   | 0.61   | 0.62   | 0.67     | 0.36     | 0.42     | 0.37      | 0.58    | 0.60     | 0.60    | 0.32     | 0.00     | 0.00     | 0.50   | 0.51    | 0.55     |  |
| SD3-Anim                                                      | 0.34   | 0.32   | 0.38    | 0.62   | 0.60   | 0.61   | 0.66     | 0.36     | 0.41     | 0.37      | 0.57    | 0.59     | 0.59    | 0.33     | 0.00     | 0.00     | 0.49   | 0.51    | 0.54     |  |
| XL-DPO                                                        | 0.61   | 0.59   | 0.59    | 0.23   | 0.22   | 0.25   | 0.53     | 0.54     | 0.54     | 0.60      | 0.44    | 0.43     | 0.44    | 0.62     | 0.48     | 0.48     | 0.00   | 0.09    | 0.28     |  |
| XL-Base                                                       | 0.54   | 0.52   | 0.53    | 0.27   | 0.27   | 0.26   | 0.48     | 0.48     | 0.47     | 0.55      | 0.39    | 0.38     | 0.38    | 0.57     | 0.44     | 0.44     | 0.08   | 0.00    | 0.27     |  |
| XL-Light                                                      | 0.48   | 0.48   | 0.47    | 0.34   | 0.33   | 0.31   | 0.48     | 0.45     | 0.44     | 0.51      | 0.34    | 0.33     | 0.33    | 0.51     | 0.41     | 0.41     | 0.22   | 0.23    | 0.00     |  |

Table A12. Normalized Wasserstein Distance Matrix. Each column normalized by max distance to base models. ■ Short, ■ Medium-low, ■ Medium-high, ■ Long distance.

| Prompt: A Photo Of A Cheesy Baked Good On A Dimmed Studio |        |        |         |        |        |        |          |          |          |           |         |          |         |          |          |          |        |         |          |
|-----------------------------------------------------------|--------|--------|---------|--------|--------|--------|----------|----------|----------|-----------|---------|----------|---------|----------|----------|----------|--------|---------|----------|
|                                                           | Flux   |        |         | Kand   |        |        | SD1.5    |          |          |           | SD2.1   |          |         | SD3      |          |          | SDXL   |         |          |
|                                                           | F-Base | F-LoRA | F-Turbo | K-Base | K-Naru | K-Poke | 1.5-v1.2 | 1.5-v1.4 | 1.5-Base | 1.5-Dream | 2.1-DPO | 2.1-Base | 2.1-Art | SD3-Real | SD3-Base | SD3-Anim | XL-DPO | XL-Base | XL-Light |
| F-Base                                                    | 0.00   | 0.43   | 0.45    | 0.74   | 0.69   | 0.61   | 0.80     | 0.68     | 0.70     | 0.56      | 0.53    | 0.64     | 0.62    | 0.50     | 0.65     | 0.65     | 0.55   | 0.59    | 0.55     |
| F-LoRA                                                    | 0.42   | 0.00   | 0.61    | 0.63   | 0.61   | 0.65   | 0.74     | 0.71     | 0.72     | 0.64      | 0.54    | 0.58     | 0.58    | 0.57     | 0.71     | 0.71     | 0.55   | 0.58    | 0.60     |
| F-Turbo                                                   | 0.45   | 0.63   | 0.00    | 0.74   | 0.70   | 0.67   | 0.70     | 0.72     | 0.69     | 0.64      | 0.65    | 0.76     | 0.74    | 0.57     | 0.65     | 0.65     | 0.65   | 0.70    | 0.59     |
| K-Base                                                    | 1.00   | 0.87   | 1.00    | 0.00   | 0.20   | 0.69   | 0.77     | 1.00     | 1.00     | 1.00      | 1.00    | 1.00     | 1.00    | 1.00     | 1.00     | 1.00     | 1.00   | 1.00    | 1.00     |
| K-Naru                                                    | 0.89   | 0.81   | 1.00    | 0.19   | 0.00   | 0.63   | 0.85     | 0.98     | 0.96     | 0.89      | 0.88    | 0.95     | 0.96    | 0.83     | 0.90     | 0.90     | 0.82   | 0.83    | 0.81     |
| K-Poke                                                    | 0.56   | 0.61   | 0.61    | 0.47   | 0.45   | 0.00   | 0.80     | 0.71     | 0.68     | 0.55      | 0.55    | 0.66     | 0.64    | 0.52     | 0.65     | 0.65     | 0.55   | 0.61    | 0.58     |
| 1.5-v1.2                                                  | 1.12   | 1.05   | 0.97    | 0.79   | 0.91   | 1.22   | 0.00     | 0.67     | 0.65     | 0.86      | 1.01    | 0.95     | 0.95    | 1.03     | 0.96     | 0.97     | 1.10   | 1.05    | 1.01     |
| 1.5-v1.4                                                  | 0.82   | 0.88   | 0.86    | 0.90   | 0.91   | 0.94   | 0.58     | 0.00     | 0.36     | 0.46      | 0.64    | 0.67     | 0.70    | 0.70     | 0.88     | 0.89     | 0.67   | 0.66    | 0.67     |
| 1.5-Base                                                  | 0.94   | 1.00   | 0.92    | 1.00   | 1.00   | 1.00   | 0.63     | 0.40     | 0.00     | 0.41      | 0.66    | 0.68     | 0.71    | 0.65     | 0.82     | 0.83     | 0.69   | 0.69    | 0.69     |
| 1.5-Dream                                                 | 1.16   | 1.36   | 1.32    | 1.54   | 1.43   | 1.24   | 1.28     | 0.78     | 0.62     | 0.00      | 0.75    | 1.16     | 1.19    | 0.57     | 1.07     | 1.09     | 0.68   | 0.71    | 0.79     |
| 2.1-DPO                                                   | 0.59   | 0.61   | 0.72    | 0.82   | 0.75   | 0.67   | 0.81     | 0.59     | 0.54     | 0.40      | 0.00    | 0.41     | 0.43    | 0.44     | 0.65     | 0.66     | 0.38   | 0.42    | 0.46     |
| 2.1-Base                                                  | 0.58   | 0.54   | 0.68    | 0.67   | 0.67   | 0.65   | 0.62     | 0.50     | 0.46     | 0.51      | 0.34    | 0.00     | 0.06    | 0.55     | 0.63     | 0.64     | 0.50   | 0.52    | 0.54     |
| 2.1-Art                                                   | 0.55   | 0.53   | 0.66    | 0.66   | 0.67   | 0.63   | 0.61     | 0.52     | 0.47     | 0.51      | 0.34    | 0.06     | 0.00    | 0.52     | 0.59     | 0.60     | 0.51   | 0.53    | 0.53     |
| SD3-Real                                                  | 0.80   | 0.93   | 0.90    | 1.18   | 1.02   | 0.90   | 1.18     | 0.93     | 0.76     | 0.44      | 0.63    | 0.96     | 0.93    | 0.00     | 0.50     | 0.50     | 0.51   | 0.56    | 0.60     |
| SD3-Base                                                  | 0.74   | 0.83   | 0.74    | 0.85   | 0.79   | 0.82   | 0.79     | 0.83     | 0.69     | 0.59      | 0.67    | 0.80     | 0.76    | 0.36     | 0.00     | 0.00     | 0.65   | 0.71    | 0.67     |
| SD3-Anim                                                  | 0.73   | 0.82   | 0.73    | 0.84   | 0.78   | 0.80   | 0.78     | 0.83     | 0.69     | 0.59      | 0.67    | 0.79     | 0.75    | 0.35     | 0.00     | 0.00     | 0.65   | 0.71    | 0.67     |
| XL-DPO                                                    | 0.72   | 0.75   | 0.85    | 0.97   | 0.84   | 0.79   | 1.03     | 0.72     | 0.67     | 0.43      | 0.45    | 0.72     | 0.75    | 0.42     | 0.75     | 0.75     | 0.00   | 0.22    | 0.43     |
| XL-Base                                                   | 0.78   | 0.78   | 0.92    | 0.98   | 0.84   | 0.88   | 1.00     | 0.72     | 0.68     | 0.45      | 0.50    | 0.76     | 0.78    | 0.47     | 0.82     | 0.83     | 0.23   | 0.00    | 0.42     |
| XL-Light                                                  | 0.67   | 0.74   | 0.70    | 0.89   | 0.75   | 0.76   | 0.87     | 0.67     | 0.61     | 0.46      | 0.49    | 0.72     | 0.72    | 0.46     | 0.71     | 0.71     | 0.39   | 0.38    | 0.00     |

Table A13. Normalized Wasserstein Distance Matrix. Each column normalized by max distance to base models. ■ Short, ■ Medium-low, ■ Medium-high, ■ Long distance.

| Prompt: A Photo Of A Dangerous Animal In A Dimmed Studio |        |        |         |        |        |        |          |          |          |           |         |          |         |          |          |          |        |         |          |
|----------------------------------------------------------|--------|--------|---------|--------|--------|--------|----------|----------|----------|-----------|---------|----------|---------|----------|----------|----------|--------|---------|----------|
|                                                          | Flux   |        |         | Kand   |        |        | SD1.5    |          |          |           | SD2.1   |          |         | SD3      |          |          | SDXL   |         |          |
|                                                          | F-Base | F-LoRA | F-Turbo | K-Base | K-Naru | K-Poke | 1.5-v1.2 | 1.5-v1.4 | 1.5-Base | 1.5-Dream | 2.1-DPO | 2.1-Base | 2.1-Art | SD3-Real | SD3-Base | SD3-Anim | XL-DPO | XL-Base | XL-Light |
| F-Base                                                   | 0.00   | 0.60   | 0.25    | 0.88   | 0.90   | 0.90   | 0.95     | 0.96     | 0.95     | 0.98      | 0.61    | 0.56     | 0.57    | 0.45     | 0.43     | 0.44     | 0.88   | 0.89    | 0.79     |
| F-LoRA                                                   | 0.57   | 0.00   | 0.66    | 0.76   | 0.75   | 0.83   | 0.85     | 0.86     | 0.87     | 0.89      | 0.92    | 0.90     | 0.91    | 0.66     | 0.83     | 0.83     | 0.79   | 0.75    | 0.65     |
| F-Turbo                                                  | 0.24   | 0.68   | 0.00    | 0.85   | 0.87   | 0.85   | 0.91     | 0.92     | 0.92     | 0.92      | 0.50    | 0.50     | 0.50    | 0.46     | 0.44     | 0.44     | 0.91   | 0.93    | 0.80     |
| K-Base                                                   | 0.88   | 0.80   | 0.87    | 0.00   | 0.10   | 0.32   | 0.51     | 0.53     | 0.56     | 0.52      | 0.89    | 0.95     | 0.94    | 0.87     | 0.89     | 0.89     | 0.70   | 0.56    | 0.58     |
| K-Naru                                                   | 0.93   | 0.82   | 0.94    | 0.11   | 0.00   | 0.34   | 0.50     | 0.53     | 0.55     | 0.51      | 0.93    | 0.98     | 0.97    | 0.91     | 0.95     | 0.95     | 0.69   | 0.56    | 0.57     |
| K-Poke                                                   | 0.92   | 0.89   | 0.89    | 0.32   | 0.33   | 0.00   | 0.50     | 0.51     | 0.53     | 0.41      | 0.86    | 0.97     | 0.95    | 0.95     | 0.92     | 0.92     | 0.79   | 0.65    | 0.62     |
| 1.5-v1.2                                                 | 1.15   | 1.09   | 1.14    | 0.62   | 0.59   | 0.60   | 0.00     | 0.28     | 0.34     | 0.37      | 1.13    | 1.15     | 1.16    | 1.18     | 1.13     | 1.13     | 0.89   | 0.66    | 0.59     |
| 1.5-v1.4                                                 | 1.08   | 1.01   | 1.06    | 0.59   | 0.57   | 0.56   | 0.26     | 0.00     | 0.28     | 0.38      | 1.03    | 1.06     | 1.06    | 1.07     | 1.04     | 1.05     | 0.83   | 0.62    | 0.57     |
| 1.5-Base                                                 | 1.00   | 0.97   | 1.00    | 0.59   | 0.56   | 0.54   | 0.29     | 0.26     | 0.00     | 0.38      | 1.00    | 1.00     | 1.00    | 1.00     | 1.00     | 1.00     | 0.81   | 0.64    | 0.58     |
| 1.5-Dream                                                | 1.34   | 1.29   | 1.30    | 0.72   | 0.68   | 0.55   | 0.41     | 0.47     | 0.50     | 0.00      | 1.16    | 1.26     | 1.25    | 1.41     | 1.31     | 1.30     | 1.13   | 0.82    | 0.73     |
| 2.1-DPO                                                  | 0.61   | 0.97   | 0.52    | 0.89   | 0.90   | 0.85   | 0.93     | 0.93     | 0.95     | 0.85      | 0.00    | 0.22     | 0.22    | 0.48     | 0.55     | 0.55     | 0.97   | 0.98    | 0.97     |
| 2.1-Base                                                 | 0.59   | 1.00   | 0.55    | 1.00   | 1.00   | 1.00   | 1.00     | 1.00     | 1.00     | 0.97      | 0.23    | 0.00     | 0.03    | 0.45     | 0.53     | 0.53     | 1.00   | 1.00    | 1.00     |
| 2.1-Art                                                  | 0.59   | 0.98   | 0.53    | 0.96   | 0.96   | 0.95   | 0.97     | 0.97     | 0.97     | 0.93      | 0.23    | 0.03     | 0.00    | 0.46     | 0.53     | 0.54     | 0.98   | 0.98    | 0.98     |
| SD3-Real                                                 | 0.58   | 0.90   | 0.61    | 1.13   | 1.13   | 1.21   | 1.25     | 1.23     | 1.22     | 1.32      | 0.62    | 0.54     | 0.58    | 0.00     | 0.52     | 0.53     | 1.00   | 1.09    | 1.07     |
| SD3-Base                                                 | 0.46   | 0.92   | 0.48    | 0.94   | 0.96   | 0.95   | 0.97     | 0.98     | 1.00     | 1.00      | 0.57    | 0.52     | 0.55    | 0.43     | 0.00     | 0.00     | 0.82   | 0.84    | 0.77     |
| SD3-Anim                                                 | 0.46   | 0.92   | 0.48    | 0.93   | 0.95   | 0.95   | 0.97     | 0.98     | 0.99     | 0.99      | 0.57    | 0.53     | 0.55    | 0.43     | 0.00     | 0.00     | 0.82   | 0.83    | 0.76     |
| XL-DPO                                                   | 0.71   | 0.67   | 0.76    | 0.56   | 0.53   | 0.62   | 0.59     | 0.60     | 0.62     | 0.67      | 0.78    | 0.76     | 0.78    | 0.63     | 0.63     | 0.63     | 0.00   | 0.25    | 0.34     |
| XL-Base                                                  | 0.87   | 0.77   | 0.93    | 0.55   | 0.52   | 0.62   | 0.52     | 0.54     | 0.59     | 0.58      | 0.95    | 0.92     | 0.93    | 0.82     | 0.77     | 0.77     | 0.30   | 0.00    | 0.30     |
| XL-Light                                                 | 0.89   | 0.77   | 0.93    | 0.65   | 0.63   | 0.69   | 0.55     | 0.58     | 0.62     | 0.60      | 1.09    | 1.07     | 1.08    | 0.94     | 0.83     | 0.83     | 0.48   | 0.35    | 0.00     |

Table A14. Normalized Wasserstein Distance Matrix. Each column normalized by max distance to base models. ■ Short, ■ Medium-low, ■ Medium-high, ■ Long distance.

|           |  | Prompt: A Photo Of A Dangerous Animal In A Forest |        |         |        |        |        |          |          |          |           |         |          |         |          |          |          |        |         |          |
|-----------|--|---------------------------------------------------|--------|---------|--------|--------|--------|----------|----------|----------|-----------|---------|----------|---------|----------|----------|----------|--------|---------|----------|
|           |  | Flux                                              |        |         | Kand   |        |        | SD1.5    |          |          |           | SD2.1   |          |         | SD3      |          |          | SDXL   |         |          |
|           |  | F-Base                                            | F-LoRA | F-Turbo | K-Base | K-Naru | K-Poke | 1.5-v1.2 | 1.5-v1.4 | 1.5-Base | 1.5-Dream | 2.1-DPO | 2.1-Base | 2.1-Art | SD3-Real | SD3-Base | SD3-Anim | XL-DPO | XL-Base | XL-Light |
| F-Base    |  | 0.00                                              | 0.70   | 0.32    | 0.77   | 0.70   | 0.77   | 0.90     | 0.86     | 0.74     | 0.98      | 0.86    | 0.98     | 0.98    | 0.78     | 0.57     | 0.57     | 0.45   | 0.58    | 0.35     |
| F-LoRA    |  | 0.77                                              | 0.00   | 1.18    | 0.81   | 0.87   | 0.81   | 1.05     | 0.99     | 1.03     | 1.03      | 1.04    | 1.08     | 1.07    | 1.05     | 0.84     | 0.86     | 0.47   | 0.44    | 0.51     |
| F-Turbo   |  | 0.30                                              | 1.01   | 0.00    | 0.89   | 0.79   | 0.87   | 0.90     | 0.88     | 0.76     | 0.95      | 0.85    | 0.93     | 0.93    | 0.81     | 0.89     | 0.88     | 0.76   | 0.89    | 0.67     |
| K-Base    |  | 0.73                                              | 0.70   | 0.89    | 0.00   | 0.14   | 0.27   | 0.71     | 0.59     | 0.67     | 0.70      | 0.72    | 0.79     | 0.78    | 1.00     | 0.93     | 0.94     | 0.62   | 0.62    | 0.55     |
| K-Naru    |  | 0.63                                              | 0.72   | 0.76    | 0.13   | 0.00   | 0.28   | 0.69     | 0.56     | 0.63     | 0.70      | 0.69    | 0.76     | 0.75    | 0.91     | 0.90     | 0.90     | 0.59   | 0.60    | 0.51     |
| K-Poke    |  | 0.83                                              | 0.79   | 0.99    | 0.31   | 0.32   | 0.00   | 0.75     | 0.58     | 0.73     | 0.71      | 0.74    | 0.78     | 0.77    | 1.13     | 1.06     | 1.07     | 0.76   | 0.76    | 0.63     |
| 1.5-v1.2  |  | 0.84                                              | 0.88   | 0.89    | 0.69   | 0.71   | 0.65   | 0.00     | 0.36     | 0.49     | 0.47      | 0.53    | 0.53     | 0.54    | 0.84     | 0.91     | 0.91     | 0.82   | 0.84    | 0.78     |
| 1.5-v1.4  |  | 0.85                                              | 0.88   | 0.91    | 0.61   | 0.61   | 0.53   | 0.38     | 0.00     | 0.45     | 0.47      | 0.50    | 0.51     | 0.50    | 0.93     | 0.97     | 0.97     | 0.85   | 0.86    | 0.78     |
| 1.5-Base  |  | 0.64                                              | 0.81   | 0.69    | 0.61   | 0.59   | 0.59   | 0.46     | 0.40     | 0.00     | 0.56      | 0.56    | 0.58     | 0.58    | 0.78     | 0.85     | 0.85     | 0.69   | 0.73    | 0.65     |
| 1.5-Dream |  | 1.04                                              | 0.99   | 1.06    | 0.79   | 0.82   | 0.70   | 0.54     | 0.51     | 0.69     | 0.00      | 0.50    | 0.60     | 0.60    | 0.87     | 1.04     | 1.03     | 0.93   | 0.95    | 0.97     |
| 2.1-DPO   |  | 0.82                                              | 0.89   | 0.85    | 0.72   | 0.72   | 0.66   | 0.54     | 0.48     | 0.62     | 0.44      | 0.00    | 0.35     | 0.36    | 0.86     | 0.93     | 0.93     | 0.84   | 0.85    | 0.85     |
| 2.1-Base  |  | 1.00                                              | 1.00   | 1.00    | 0.85   | 0.84   | 0.74   | 0.58     | 0.52     | 0.69     | 0.57      | 0.38    | 0.00     | 0.02    | 0.88     | 1.00     | 1.00     | 1.00   | 1.00    | 1.00     |
| 2.1-Art   |  | 1.00                                              | 0.99   | 1.00    | 0.84   | 0.84   | 0.73   | 0.59     | 0.52     | 0.69     | 0.58      | 0.38    | 0.02     | 0.00    | 0.91     | 1.00     | 1.01     | 1.00   | 0.99    | 0.99     |
| SD3-Real  |  | 1.14                                              | 1.39   | 1.25    | 1.54   | 1.45   | 1.54   | 1.32     | 1.37     | 1.32     | 1.20      | 1.32    | 1.27     | 1.30    | 0.00     | 1.15     | 1.11     | 1.21   | 1.35    | 1.31     |
| SD3-Base  |  | 0.58                                              | 0.78   | 0.96    | 1.00   | 1.00   | 1.00   | 1.00     | 1.00     | 1.00     | 1.00      | 1.00    | 1.00     | 1.00    | 0.80     | 0.00     | 0.00     | 0.51   | 0.66    | 0.46     |
| SD3-Anim  |  | 0.57                                              | 0.79   | 0.95    | 1.01   | 1.01   | 1.01   | 0.99     | 1.00     | 1.00     | 0.99      | 0.99    | 1.00     | 1.00    | 0.77     | 0.00     | 0.00     | 0.51   | 0.67    | 0.47     |
| XL-DPO    |  | 0.47                                              | 0.44   | 0.83    | 0.68   | 0.67   | 0.73   | 0.91     | 0.89     | 0.83     | 0.91      | 0.92    | 1.02     | 1.02    | 0.86     | 0.52     | 0.53     | 0.00   | 0.16    | 0.21     |
| XL-Base   |  | 0.58                                              | 0.40   | 0.94    | 0.65   | 0.65   | 0.71   | 0.90     | 0.87     | 0.85     | 0.89      | 0.89    | 0.98     | 0.97    | 0.92     | 0.64     | 0.66     | 0.15   | 0.00    | 0.26     |
| XL-Light  |  | 0.40                                              | 0.52   | 0.80    | 0.65   | 0.64   | 0.67   | 0.95     | 0.89     | 0.86     | 1.03      | 1.02    | 1.11     | 1.10    | 1.01     | 0.51     | 0.53     | 0.22   | 0.29    | 0.00     |

Table A15. Normalized Wasserstein Distance Matrix. Each column normalized by max distance to base models. ■ Short, ■ Medium-low, ■ Medium-high, ■ Long distance.

|           |  | Prompt: A Photo Of A Dangerous Animal In A Grassland |        |         |        |        |        |          |          |          |           |         |          |         |          |          |          |        |         |          |
|-----------|--|------------------------------------------------------|--------|---------|--------|--------|--------|----------|----------|----------|-----------|---------|----------|---------|----------|----------|----------|--------|---------|----------|
|           |  | Flux                                                 |        |         | Kand   |        |        | SD1.5    |          |          |           | SD2.1   |          |         | SD3      |          |          | SDXL   |         |          |
|           |  | F-Base                                               | F-LoRA | F-Turbo | K-Base | K-Naru | K-Poke | 1.5-v1.2 | 1.5-v1.4 | 1.5-Base | 1.5-Dream | 2.1-DPO | 2.1-Base | 2.1-Art | SD3-Real | SD3-Base | SD3-Anim | XL-DPO | XL-Base | XL-Light |
| F-Base    |  | 0.00                                                 | 0.28   | 0.18    | 0.88   | 0.84   | 0.97   | 1.00     | 1.00     | 1.00     | 1.00      | 1.00    | 1.00     | 1.00    | 1.00     | 0.93     | 0.93     | 0.74   | 0.69    | 0.78     |
| F-LoRA    |  | 0.36                                                 | 0.00   | 0.50    | 0.98   | 0.93   | 1.19   | 1.19     | 1.08     | 1.09     | 1.12      | 1.17    | 1.18     | 1.17    | 1.17     | 1.32     | 1.33     | 0.71   | 0.66    | 0.69     |
| F-Turbo   |  | 0.16                                                 | 0.35   | 0.00    | 0.87   | 0.85   | 0.97   | 0.88     | 0.88     | 0.89     | 0.90      | 0.87    | 0.90     | 0.90    | 0.85     | 0.79     | 0.79     | 0.75   | 0.74    | 0.81     |
| K-Base    |  | 0.85                                                 | 0.74   | 0.94    | 0.00   | 0.09   | 0.27   | 0.66     | 0.63     | 0.61     | 0.61      | 0.64    | 0.63     | 0.62    | 0.92     | 1.00     | 1.00     | 0.47   | 0.53    | 0.73     |
| K-Naru    |  | 0.82                                                 | 0.71   | 0.94    | 0.09   | 0.00   | 0.28   | 0.68     | 0.65     | 0.63     | 0.62      | 0.65    | 0.65     | 0.64    | 0.94     | 1.01     | 1.02     | 0.46   | 0.52    | 0.72     |
| K-Poke    |  | 0.80                                                 | 0.76   | 0.89    | 0.23   | 0.24   | 0.00   | 0.64     | 0.62     | 0.63     | 0.57      | 0.57    | 0.58     | 0.58    | 0.82     | 0.84     | 0.84     | 0.53   | 0.59    | 0.80     |
| 1.5-v1.2  |  | 1.02                                                 | 0.94   | 1.00    | 0.69   | 0.70   | 0.79   | 0.00     | 0.23     | 0.27     | 0.24      | 0.49    | 0.53     | 0.53    | 0.70     | 0.80     | 0.78     | 0.80   | 0.84    | 0.91     |
| 1.5-v1.4  |  | 1.15                                                 | 0.97   | 1.14    | 0.74   | 0.76   | 0.88   | 0.26     | 0.00     | 0.24     | 0.26      | 0.53    | 0.54     | 0.53    | 0.66     | 0.85     | 0.84     | 0.80   | 0.84    | 0.95     |
| 1.5-Base  |  | 1.00                                                 | 0.85   | 1.00    | 0.63   | 0.64   | 0.77   | 0.27     | 0.21     | 0.00     | 0.29      | 0.48    | 0.48     | 0.46    | 0.68     | 0.83     | 0.82     | 0.69   | 0.72    | 0.82     |
| 1.5-Dream |  | 1.18                                                 | 1.03   | 1.19    | 0.74   | 0.75   | 0.82   | 0.28     | 0.27     | 0.34     | 0.00      | 0.67    | 0.68     | 0.68    | 0.85     | 1.04     | 1.02     | 0.92   | 0.95    | 1.04     |
| 2.1-DPO   |  | 0.93                                                 | 0.85   | 0.91    | 0.61   | 0.61   | 0.64   | 0.45     | 0.42     | 0.45     | 0.52      | 0.00    | 0.33     | 0.33    | 0.46     | 0.52     | 0.51     | 0.63   | 0.67    | 0.76     |
| 2.1-Base  |  | 0.86                                                 | 0.79   | 0.86    | 0.56   | 0.57   | 0.61   | 0.45     | 0.41     | 0.41     | 0.49      | 0.30    | 0.00     | 0.02    | 0.53     | 0.58     | 0.58     | 0.59   | 0.61    | 0.78     |
| 2.1-Art   |  | 0.87                                                 | 0.79   | 0.88    | 0.56   | 0.57   | 0.62   | 0.45     | 0.40     | 0.40     | 0.50      | 0.31    | 0.02     | 0.00    | 0.54     | 0.60     | 0.59     | 0.60   | 0.63    | 0.78     |
| SD3-Real  |  | 1.30                                                 | 1.18   | 1.24    | 1.23   | 1.23   | 1.30   | 0.89     | 0.75     | 0.88     | 0.93      | 0.65    | 0.80     | 0.80    | 0.00     | 0.41     | 0.40     | 1.17   | 1.19    | 1.12     |
| SD3-Base  |  | 0.90                                                 | 1.00   | 0.86    | 1.00   | 1.00   | 1.00   | 0.76     | 0.71     | 0.80     | 0.85      | 0.54    | 0.65     | 0.66    | 0.31     | 0.00     | 0.00     | 1.00   | 1.00    | 1.00     |
| SD3-Anim  |  | 0.93                                                 | 1.03   | 0.88    | 1.02   | 1.03   | 1.02   | 0.77     | 0.72     | 0.81     | 0.86      | 0.55    | 0.66     | 0.67    | 0.30     | 0.00     | 0.00     | 1.03   | 1.03    | 1.02     |
| XL-DPO    |  | 0.65                                                 | 0.49   | 0.74    | 0.43   | 0.41   | 0.58   | 0.69     | 0.62     | 0.61     | 0.69      | 0.60    | 0.61     | 0.61    | 0.80     | 0.91     | 0.92     | 0.00   | 0.17    | 0.47     |
| XL-Base   |  | 0.60                                                 | 0.44   | 0.72    | 0.47   | 0.46   | 0.62   | 0.71     | 0.64     | 0.62     | 0.70      | 0.62    | 0.62     | 0.62    | 0.80     | 0.90     | 0.90     | 0.17   | 0.00    | 0.46     |
| XL-Light  |  | 0.72                                                 | 0.49   | 0.82    | 0.69   | 0.67   | 0.90   | 0.82     | 0.75     | 0.75     | 0.81      | 0.75    | 0.83     | 0.82    | 0.79     | 0.94     | 0.94     | 0.49   | 0.48    | 0.00     |

Table A16. Normalized Wasserstein Distance Matrix. Each column normalized by max distance to base models. ■ Short, ■ Medium-low, ■ Medium-high, ■ Long distance.

|           |  | Prompt: A Photo Of A Frozen Single Fruit On A Dimmed Studio |        |         |        |        |        |          |          |          |           |         |          |         |          |          |          |        |         |          |  |  |
|-----------|--|-------------------------------------------------------------|--------|---------|--------|--------|--------|----------|----------|----------|-----------|---------|----------|---------|----------|----------|----------|--------|---------|----------|--|--|
|           |  | Flux                                                        |        |         | Kand   |        |        | SD1.5    |          |          |           | SD2.1   |          |         | SD3      |          |          | SDXL   |         |          |  |  |
|           |  | F-Base                                                      | F-LoRA | F-Turbo | K-Base | K-Naru | K-Poke | 1.5-v1.2 | 1.5-v1.4 | 1.5-Base | 1.5-Dream | 2.1-DPO | 2.1-Base | 2.1-Art | SD3-Real | SD3-Base | SD3-Anim | XL-DPO | XL-Base | XL-Light |  |  |
| F-Base    |  | 0.00                                                        | 0.18   | 0.20    | 0.48   | 0.50   | 0.48   | 1.00     | 1.00     | 1.00     | 0.99      | 0.92    | 0.92     | 0.91    | 0.83     | 0.81     | 0.80     | 0.73   | 0.81    | 0.55     |  |  |
| F-LoRA    |  | 0.16                                                        | 0.00   | 0.25    | 0.46   | 0.45   | 0.50   | 0.94     | 0.91     | 0.89     | 0.96      | 0.89    | 0.85     | 0.83    | 0.79     | 0.87     | 0.86     | 0.67   | 0.74    | 0.48     |  |  |
| F-Turbo   |  | 0.17                                                        | 0.24   | 0.00    | 0.44   | 0.48   | 0.49   | 0.88     | 0.90     | 0.85     | 0.86      | 0.80    | 0.79     | 0.78    | 0.79     | 0.82     | 0.82     | 0.62   | 0.69    | 0.47     |  |  |
| K-Base    |  | 0.34                                                        | 0.37   | 0.37    | 0.00   | 0.14   | 0.17   | 0.75     | 0.70     | 0.70     | 0.64      | 0.80    | 0.75     | 0.74    | 0.35     | 0.49     | 0.50     | 0.41   | 0.48    | 0.37     |  |  |
| K-Naru    |  | 0.40                                                        | 0.40   | 0.45    | 0.16   | 0.00   | 0.22   | 0.86     | 0.78     | 0.76     | 0.75      | 0.92    | 0.83     | 0.82    | 0.38     | 0.67     | 0.68     | 0.41   | 0.56    | 0.42     |  |  |
| K-Poke    |  | 0.40                                                        | 0.47   | 0.48    | 0.20   | 0.22   | 0.00   | 0.84     | 0.75     | 0.81     | 0.71      | 0.93    | 0.86     | 0.85    | 0.27     | 0.34     | 0.35     | 0.50   | 0.58    | 0.49     |  |  |
| 1.5-v1.2  |  | 0.85                                                        | 0.89   | 0.87    | 0.88   | 0.90   | 0.85   | 0.00     | 0.40     | 0.40     | 0.86      | 0.74    | 0.67     | 0.66    | 0.92     | 0.78     | 0.77     | 0.81   | 0.86    | 0.84     |  |  |
| 1.5-v1.4  |  | 0.88                                                        | 0.90   | 0.93    | 0.86   | 0.86   | 0.79   | 0.42     | 0.00     | 0.36     | 0.85      | 0.81    | 0.71     | 0.71    | 0.81     | 0.73     | 0.73     | 0.77   | 0.81    | 0.82     |  |  |
| 1.5-Base  |  | 1.00                                                        | 1.00   | 1.00    | 0.98   | 0.94   | 0.97   | 0.47     | 0.41     | 0.00     | 0.91      | 0.75    | 0.64     | 0.64    | 0.96     | 0.92     | 0.91     | 0.83   | 0.88    | 0.91     |  |  |
| 1.5-Dream |  | 0.57                                                        | 0.61   | 0.57    | 0.51   | 0.53   | 0.49   | 0.58     | 0.55     | 0.52     | 0.00      | 0.59    | 0.55     | 0.54    | 0.51     | 0.59     | 0.60     | 0.51   | 0.57    | 0.54     |  |  |
| 2.1-DPO   |  | 0.91                                                        | 0.98   | 0.92    | 1.00   | 1.13   | 1.10   | 0.86     | 0.90     | 0.74     | 1.02      | 0.00    | 0.26     | 0.25    | 1.15     | 1.02     | 1.02     | 1.03   | 0.98    | 1.02     |  |  |
| 2.1-Base  |  | 0.89                                                        | 0.92   | 0.89    | 1.00   | 1.00   | 1.00   | 0.76     | 0.78     | 0.62     | 0.92      | 0.25    | 0.00     | 0.01    | 1.00     | 1.00     | 1.00     | 0.85   | 0.89    | 0.87     |  |  |
| 2.1-Art   |  | 0.88                                                        | 0.90   | 0.88    | 0.98   | 0.98   | 0.98   | 0.75     | 0.77     | 0.62     | 0.90      | 0.25    | 0.01     | 0.00    | 0.99     | 1.00     | 1.00     | 0.83   | 0.87    | 0.86     |  |  |
| SD3-Real  |  | 0.55                                                        | 0.58   | 0.61    | 0.32   | 0.31   | 0.22   | 0.71     | 0.61     | 0.63     | 0.59      | 0.76    | 0.68     | 0.67    | 0.00     | 0.34     | 0.35     | 0.46   | 0.56    | 0.55     |  |  |
| SD3-Base  |  | 0.78                                                        | 0.94   | 0.92    | 0.66   | 0.81   | 0.39   | 0.89     | 0.80     | 0.88     | 1.00      | 1.00    | 1.00     | 1.00    | 0.50     | 0.00     | 0.00     | 1.00   | 1.00    | 1.00     |  |  |
| SD3-Anim  |  | 0.79                                                        | 0.95   | 0.94    | 0.69   | 0.84   | 0.41   | 0.90     | 0.81     | 0.90     | 1.03      | 1.02    | 1.02     | 1.02    | 0.53     | 0.00     | 0.00     | 1.04   | 1.03    | 1.03     |  |  |
| XL-DPO    |  | 0.50                                                        | 0.51   | 0.49    | 0.39   | 0.35   | 0.41   | 0.66     | 0.60     | 0.57     | 0.61      | 0.71    | 0.60     | 0.59    | 0.48     | 0.71     | 0.72     | 0.00   | 0.27    | 0.33     |  |  |
| XL-Base   |  | 0.50                                                        | 0.51   | 0.50    | 0.41   | 0.42   | 0.43   | 0.62     | 0.57     | 0.54     | 0.61      | 0.61    | 0.57     | 0.55    | 0.52     | 0.64     | 0.64     | 0.24   | 0.00    | 0.39     |  |  |
| XL-Light  |  | 0.39                                                        | 0.38   | 0.38    | 0.36   | 0.37   | 0.41   | 0.70     | 0.66     | 0.64     | 0.67      | 0.73    | 0.63     | 0.63    | 0.59     | 0.73     | 0.73     | 0.34   | 0.45    | 0.00     |  |  |

Table A17. Normalized Wasserstein Distance Matrix. Each column normalized by max distance to base models. ■ Short, ■ Medium-low, ■ Medium-high, ■ Long distance.

|           |  | Prompt: A Photo Of A Frozen Single Fruit On A Dish |        |         |        |        |        |          |          |          |           |         |          |         |          |          |          |        |         |          |  |  |
|-----------|--|----------------------------------------------------|--------|---------|--------|--------|--------|----------|----------|----------|-----------|---------|----------|---------|----------|----------|----------|--------|---------|----------|--|--|
|           |  | Flux                                               |        |         | Kand   |        |        | SD1.5    |          |          |           | SD2.1   |          |         | SD3      |          |          | SDXL   |         |          |  |  |
|           |  | F-Base                                             | F-LoRA | F-Turbo | K-Base | K-Naru | K-Poke | 1.5-v1.2 | 1.5-v1.4 | 1.5-Base | 1.5-Dream | 2.1-DPO | 2.1-Base | 2.1-Art | SD3-Real | SD3-Base | SD3-Anim | XL-DPO | XL-Base | XL-Light |  |  |
| F-Base    |  | 0.00                                               | 0.28   | 0.21    | 1.00   | 1.00   | 1.00   | 1.00     | 1.00     | 1.00     | 1.00      | 0.90    | 1.00     | 1.00    | 0.94     | 1.00     | 1.00     | 1.00   | 0.97    | 1.00     |  |  |
| F-LoRA    |  | 0.22                                               | 0.00   | 0.33    | 0.81   | 0.79   | 0.78   | 0.80     | 0.84     | 0.80     | 0.83      | 0.89    | 0.94     | 0.95    | 0.81     | 0.84     | 0.84     | 0.81   | 0.83    | 0.80     |  |  |
| F-Turbo   |  | 0.20                                               | 0.41   | 0.00    | 0.96   | 1.03   | 1.10   | 0.97     | 0.96     | 0.99     | 0.89      | 0.90    | 1.03     | 1.02    | 1.10     | 1.15     | 1.15     | 1.08   | 1.07    | 1.06     |  |  |
| K-Base    |  | 0.65                                               | 0.66   | 0.64    | 0.00   | 0.27   | 0.42   | 0.53     | 0.54     | 0.54     | 0.55      | 0.83    | 0.81     | 0.79    | 1.00     | 0.85     | 0.85     | 0.83   | 0.90    | 0.70     |  |  |
| K-Naru    |  | 0.65                                               | 0.64   | 0.68    | 0.27   | 0.00   | 0.36   | 0.53     | 0.57     | 0.57     | 0.57      | 0.89    | 0.87     | 0.85    | 0.96     | 0.85     | 0.84     | 0.82   | 0.89    | 0.63     |  |  |
| K-Poke    |  | 0.84                                               | 0.82   | 0.93    | 0.54   | 0.47   | 0.00   | 0.57     | 0.61     | 0.53     | 0.71      | 1.08    | 1.04     | 1.02    | 0.87     | 0.73     | 0.73     | 0.80   | 0.94    | 0.71     |  |  |
| 1.5-v1.2  |  | 0.97                                               | 0.97   | 0.95    | 0.79   | 0.79   | 0.66   | 0.00     | 0.35     | 0.34     | 0.55      | 1.06    | 0.99     | 0.99    | 0.99     | 1.00     | 0.99     | 1.05   | 1.08    | 0.83     |  |  |
| 1.5-v1.4  |  | 0.95                                               | 1.00   | 0.92    | 0.78   | 0.83   | 0.69   | 0.34     | 0.00     | 0.29     | 0.54      | 0.98    | 0.96     | 0.96    | 0.92     | 0.94     | 0.93     | 0.98   | 1.00    | 0.82     |  |  |
| 1.5-Base  |  | 1.00                                               | 1.00   | 1.00    | 0.82   | 0.88   | 0.63   | 0.35     | 0.30     | 0.00     | 0.58      | 1.00    | 0.94     | 0.93    | 0.87     | 0.94     | 0.93     | 0.97   | 1.00    | 0.81     |  |  |
| 1.5-Dream |  | 0.78                                               | 0.81   | 0.70    | 0.66   | 0.69   | 0.66   | 0.45     | 0.44     | 0.46     | 0.00      | 0.95    | 0.96     | 0.94    | 1.04     | 0.95     | 0.94     | 1.02   | 1.05    | 0.74     |  |  |
| 2.1-DPO   |  | 0.67                                               | 0.83   | 0.68    | 0.95   | 1.03   | 0.96   | 0.82     | 0.77     | 0.75     | 0.91      | 0.00    | 0.44     | 0.43    | 0.72     | 0.88     | 0.88     | 1.03   | 0.98    | 0.94     |  |  |
| 2.1-Base  |  | 0.69                                               | 0.81   | 0.72    | 0.85   | 0.92   | 0.85   | 0.70     | 0.70     | 0.64     | 0.84      | 0.40    | 0.00     | 0.03    | 0.73     | 0.82     | 0.82     | 1.00   | 0.99    | 0.85     |  |  |
| 2.1-Art   |  | 0.69                                               | 0.81   | 0.71    | 0.83   | 0.90   | 0.84   | 0.70     | 0.70     | 0.64     | 0.83      | 0.40    | 0.03     | 0.00    | 0.73     | 0.82     | 0.82     | 1.00   | 0.98    | 0.84     |  |  |
| SD3-Real  |  | 0.81                                               | 0.88   | 0.95    | 1.32   | 1.27   | 0.90   | 0.88     | 0.83     | 0.75     | 1.15      | 0.83    | 0.91     | 0.92    | 0.00     | 0.56     | 0.57     | 0.94   | 0.91    | 0.97     |  |  |
| SD3-Base  |  | 0.68                                               | 0.71   | 0.79    | 0.89   | 0.89   | 0.60   | 0.70     | 0.68     | 0.64     | 0.83      | 0.80    | 0.81     | 0.81    | 0.44     | 0.00     | 0.00     | 0.87   | 0.89    | 0.76     |  |  |
| SD3-Anim  |  | 0.67                                               | 0.71   | 0.78    | 0.87   | 0.87   | 0.58   | 0.69     | 0.66     | 0.63     | 0.81      | 0.79    | 0.81     | 0.80    | 0.45     | 0.00     | 0.00     | 0.87   | 0.88    | 0.75     |  |  |
| XL-DPO    |  | 0.55                                               | 0.55   | 0.59    | 0.70   | 0.69   | 0.52   | 0.59     | 0.57     | 0.53     | 0.71      | 0.75    | 0.79     | 0.80    | 0.59     | 0.70     | 0.70     | 0.00   | 0.34    | 0.60     |  |  |
| XL-Base   |  | 0.54                                               | 0.58   | 0.59    | 0.76   | 0.76   | 0.62   | 0.62     | 0.58     | 0.55     | 0.74      | 0.72    | 0.80     | 0.79    | 0.59     | 0.72     | 0.72     | 0.34   | 0.00    | 0.65     |  |  |
| XL-Light  |  | 0.58                                               | 0.58   | 0.62    | 0.63   | 0.57   | 0.50   | 0.50     | 0.50     | 0.47     | 0.55      | 0.73    | 0.72     | 0.71    | 0.66     | 0.65     | 0.65     | 0.64   | 0.69    | 0.00     |  |  |

Table A18. Normalized Wasserstein Distance Matrix. Each column normalized by max distance to base models. ■ Short, ■ Medium-low, ■ Medium-high, ■ Long distance.

|           |  | Prompt: A Photo Of A Frozen Single Fruit On A Wooden Floor |        |         |        |        |        |          |          |          |           |         |          |         |          |          |          |        |         |          |
|-----------|--|------------------------------------------------------------|--------|---------|--------|--------|--------|----------|----------|----------|-----------|---------|----------|---------|----------|----------|----------|--------|---------|----------|
|           |  | Flux                                                       |        |         | Kand   |        |        | SD1.5    |          |          |           | SD2.1   |          |         | SD3      |          |          | SDXL   |         |          |
|           |  | F-Base                                                     | F-LoRA | F-Turbo | K-Base | K-Naru | K-Poke | 1.5-v1.2 | 1.5-v1.4 | 1.5-Base | 1.5-Dream | 2.1-DPO | 2.1-Base | 2.1-Art | SD3-Real | SD3-Base | SD3-Anim | XL-DPO | XL-Base | XL-Light |
| F-Base    |  | 0.00                                                       | 0.18   | 0.26    | 0.32   | 0.34   | 0.30   | 0.86     | 0.87     | 0.88     | 0.67      | 0.88    | 0.87     | 0.86    | 0.76     | 0.77     | 0.76     | 0.38   | 0.39    | 0.38     |
| F-LoRA    |  | 0.18                                                       | 0.00   | 0.30    | 0.32   | 0.31   | 0.32   | 0.96     | 0.94     | 0.93     | 0.66      | 0.91    | 0.89     | 0.89    | 0.67     | 0.86     | 0.86     | 0.38   | 0.39    | 0.38     |
| F-Turbo   |  | 0.25                                                       | 0.27   | 0.00    | 0.37   | 0.39   | 0.37   | 0.98     | 0.97     | 1.02     | 0.69      | 0.85    | 0.82     | 0.82    | 0.66     | 1.05     | 1.04     | 0.42   | 0.44    | 0.40     |
| K-Base    |  | 0.37                                                       | 0.36   | 0.45    | 0.00   | 0.13   | 0.18   | 1.00     | 0.95     | 1.00     | 0.61      | 1.00    | 1.00     | 1.00    | 0.61     | 1.00     | 1.00     | 0.32   | 0.32    | 0.39     |
| K-Naru    |  | 0.40                                                       | 0.36   | 0.48    | 0.13   | 0.00   | 0.18   | 1.06     | 0.96     | 1.02     | 0.59      | 1.05    | 1.03     | 1.02    | 0.58     | 0.98     | 0.98     | 0.37   | 0.35    | 0.45     |
| K-Poke    |  | 0.41                                                       | 0.43   | 0.54    | 0.21   | 0.21   | 0.00   | 1.12     | 1.02     | 1.10     | 0.60      | 1.20    | 1.18     | 1.18    | 0.65     | 1.04     | 1.03     | 0.34   | 0.32    | 0.42     |
| 1.5-v1.2  |  | 0.75                                                       | 0.82   | 0.91    | 0.76   | 0.78   | 0.72   | 0.00     | 0.48     | 0.48     | 0.80      | 0.70    | 0.70     | 0.69    | 1.09     | 1.05     | 1.04     | 0.71   | 0.68    | 0.76     |
| 1.5-v1.4  |  | 0.68                                                       | 0.71   | 0.80    | 0.64   | 0.63   | 0.58   | 0.43     | 0.00     | 0.41     | 0.68      | 0.72    | 0.68     | 0.67    | 0.92     | 0.91     | 0.90     | 0.60   | 0.59    | 0.68     |
| 1.5-Base  |  | 0.76                                                       | 0.78   | 0.93    | 0.75   | 0.74   | 0.69   | 0.47     | 0.45     | 0.00     | 0.74      | 0.68    | 0.66     | 0.65    | 1.00     | 0.94     | 0.93     | 0.70   | 0.70    | 0.79     |
| 1.5-Dream |  | 0.64                                                       | 0.61   | 0.70    | 0.50   | 0.48   | 0.42   | 0.87     | 0.83     | 0.81     | 0.00      | 0.83    | 0.83     | 0.82    | 0.51     | 0.98     | 0.99     | 0.65   | 0.61    | 0.72     |
| 2.1-DPO   |  | 1.00                                                       | 1.01   | 1.04    | 0.99   | 1.01   | 1.01   | 0.92     | 1.05     | 0.91     | 1.00      | 0.00    | 0.24     | 0.24    | 0.88     | 1.05     | 1.04     | 0.99   | 1.00    | 0.98     |
| 2.1-Base  |  | 1.00                                                       | 1.00   | 1.00    | 1.00   | 1.00   | 1.00   | 0.92     | 1.00     | 0.88     | 1.00      | 0.24    | 0.00     | 0.01    | 0.87     | 1.00     | 1.00     | 1.00   | 1.00    | 1.00     |
| 2.1-Art   |  | 1.01                                                       | 1.01   | 1.01    | 1.01   | 1.00   | 1.01   | 0.92     | 1.00     | 0.88     | 1.01      | 0.24    | 0.01     | 0.00    | 0.88     | 1.01     | 1.00     | 1.01   | 1.01    | 1.02     |
| SD3-Real  |  | 1.00                                                       | 0.86   | 0.91    | 0.69   | 0.64   | 0.62   | 1.63     | 1.54     | 1.52     | 0.70      | 1.01    | 1.00     | 0.99    | 0.00     | 1.51     | 1.53     | 0.88   | 0.86    | 0.96     |
| SD3-Base  |  | 0.51                                                       | 0.56   | 0.74    | 0.58   | 0.55   | 0.51   | 0.81     | 0.78     | 0.73     | 0.69      | 0.61    | 0.58     | 0.58    | 0.77     | 0.00     | 0.00     | 0.66   | 0.63    | 0.73     |
| SD3-Anim  |  | 0.51                                                       | 0.56   | 0.74    | 0.58   | 0.55   | 0.51   | 0.79     | 0.76     | 0.72     | 0.69      | 0.61    | 0.58     | 0.57    | 0.78     | 0.00     | 0.00     | 0.65   | 0.63    | 0.73     |
| XL-DPO    |  | 0.40                                                       | 0.39   | 0.47    | 0.29   | 0.33   | 0.26   | 0.85     | 0.81     | 0.86     | 0.71      | 0.91    | 0.91     | 0.91    | 0.70     | 1.03     | 1.02     | 0.00   | 0.18    | 0.29     |
| XL-Base   |  | 0.40                                                       | 0.39   | 0.47    | 0.28   | 0.30   | 0.24   | 0.79     | 0.77     | 0.83     | 0.65      | 0.89    | 0.88     | 0.88    | 0.67     | 0.97     | 0.96     | 0.17   | 0.00    | 0.30     |
| XL-Light  |  | 0.40                                                       | 0.38   | 0.44    | 0.35   | 0.39   | 0.32   | 0.90     | 0.89     | 0.95     | 0.78      | 0.89    | 0.90     | 0.90    | 0.75     | 1.13     | 1.13     | 0.29   | 0.30    | 0.00     |

Table A19. Normalized Wasserstein Distance Matrix. Each column normalized by max distance to base models. ■ Short, ■ Medium-low, ■ Medium-high, ■ Long distance.

|           |  | Prompt: A Photo Of A Peaceful Animal In A Dimmed Studio |        |         |        |        |        |          |          |          |           |         |          |         |          |          |          |        |         |          |
|-----------|--|---------------------------------------------------------|--------|---------|--------|--------|--------|----------|----------|----------|-----------|---------|----------|---------|----------|----------|----------|--------|---------|----------|
|           |  | Flux                                                    |        |         | Kand   |        |        | SD1.5    |          |          |           | SD2.1   |          |         | SD3      |          |          | SDXL   |         |          |
|           |  | F-Base                                                  | F-LoRA | F-Turbo | K-Base | K-Naru | K-Poke | 1.5-v1.2 | 1.5-v1.4 | 1.5-Base | 1.5-Dream | 2.1-DPO | 2.1-Base | 2.1-Art | SD3-Real | SD3-Base | SD3-Anim | XL-DPO | XL-Base | XL-Light |
| F-Base    |  | 0.00                                                    | 0.43   | 0.27    | 0.71   | 0.74   | 0.72   | 0.92     | 1.00     | 1.00     | 0.97      | 0.69    | 0.69     | 0.69    | 0.66     | 0.70     | 0.69     | 0.85   | 0.81    | 0.88     |
| F-LoRA    |  | 0.44                                                    | 0.00   | 0.43    | 0.67   | 0.69   | 0.73   | 0.77     | 0.88     | 0.90     | 0.88      | 0.70    | 0.70     | 0.70    | 0.77     | 0.83     | 0.83     | 0.72   | 0.67    | 0.79     |
| F-Turbo   |  | 0.27                                                    | 0.42   | 0.00    | 0.71   | 0.76   | 0.74   | 0.91     | 1.03     | 1.02     | 0.99      | 0.69    | 0.67     | 0.68    | 0.69     | 0.70     | 0.69     | 0.82   | 0.80    | 0.83     |
| K-Base    |  | 0.86                                                    | 0.79   | 0.88    | 0.00   | 0.11   | 0.51   | 0.68     | 0.86     | 0.90     | 0.69      | 1.00    | 1.00     | 1.00    | 0.95     | 0.94     | 0.94     | 0.59   | 0.54    | 0.81     |
| K-Naru    |  | 0.87                                                    | 0.78   | 0.91    | 0.11   | 0.00   | 0.45   | 0.64     | 0.82     | 0.84     | 0.67      | 0.97    | 0.96     | 0.96    | 0.93     | 0.91     | 0.91     | 0.55   | 0.51    | 0.77     |
| K-Poke    |  | 0.81                                                    | 0.80   | 0.85    | 0.47   | 0.44   | 0.00   | 0.78     | 0.98     | 1.01     | 0.71      | 0.94    | 0.93     | 0.93    | 0.84     | 0.87     | 0.87     | 0.60   | 0.58    | 0.78     |
| 1.5-v1.2  |  | 1.06                                                    | 0.87   | 1.07    | 0.64   | 0.63   | 0.80   | 0.00     | 0.60     | 0.64     | 0.49      | 0.99    | 0.95     | 0.95    | 0.98     | 0.91     | 0.92     | 0.54   | 0.52    | 0.72     |
| 1.5-v1.4  |  | 0.84                                                    | 0.73   | 0.89    | 0.60   | 0.60   | 0.74   | 0.44     | 0.00     | 0.42     | 0.50      | 0.70    | 0.70     | 0.69    | 0.70     | 0.65     | 0.65     | 0.55   | 0.50    | 0.67     |
| 1.5-Base  |  | 0.85                                                    | 0.74   | 0.88    | 0.63   | 0.61   | 0.76   | 0.47     | 0.42     | 0.00     | 0.50      | 0.68    | 0.64     | 0.64    | 0.66     | 0.64     | 0.64     | 0.54   | 0.52    | 0.67     |
| 1.5-Dream |  | 1.26                                                    | 1.13   | 1.32    | 0.74   | 0.75   | 0.82   | 0.56     | 0.77     | 0.77     | 0.00      | 1.10    | 1.08     | 1.07    | 0.91     | 0.89     | 0.90     | 0.69   | 0.64    | 0.99     |
| 2.1-DPO   |  | 0.82                                                    | 0.82   | 0.85    | 0.99   | 1.00   | 1.00   | 1.03     | 1.00     | 0.96     | 1.01      | 0.00    | 0.24     | 0.24    | 0.43     | 0.55     | 0.54     | 0.88   | 0.83    | 0.92     |
| 2.1-Base  |  | 0.83                                                    | 0.83   | 0.83    | 1.00   | 1.00   | 1.00   | 1.00     | 1.00     | 0.92     | 1.00      | 0.24    | 0.00     | 0.01    | 0.41     | 0.52     | 0.52     | 0.88   | 0.83    | 0.90     |
| 2.1-Art   |  | 0.84                                                    | 0.83   | 0.84    | 1.00   | 1.00   | 1.00   | 1.00     | 1.00     | 0.91     | 0.99      | 0.24    | 0.01     | 0.00    | 0.41     | 0.52     | 0.52     | 0.88   | 0.83    | 0.90     |
| SD3-Real  |  | 0.94                                                    | 1.08   | 1.00    | 1.12   | 1.14   | 1.06   | 1.22     | 1.18     | 1.10     | 0.99      | 0.51    | 0.48     | 0.48    | 0.00     | 0.36     | 0.36     | 1.20   | 1.15    | 1.26     |
| SD3-Base  |  | 0.86                                                    | 1.00   | 0.88    | 0.96   | 0.97   | 0.96   | 0.98     | 0.96     | 0.93     | 0.84      | 0.56    | 0.53     | 0.53    | 0.31     | 0.00     | 0.00     | 1.00   | 1.00    | 1.00     |
| SD3-Anim  |  | 0.86                                                    | 1.00   | 0.87    | 0.96   | 0.97   | 0.96   | 0.99     | 0.96     | 0.94     | 0.85      | 0.56    | 0.53     | 0.53    | 0.31     | 0.00     | 0.00     | 1.00   | 1.00    | 1.00     |
| XL-DPO    |  | 0.98                                                    | 0.81   | 0.97    | 0.56   | 0.55   | 0.61   | 0.55     | 0.75     | 0.73     | 0.61      | 0.85    | 0.84     | 0.84    | 0.98     | 0.94     | 0.94     | 0.00   | 0.20    | 0.49     |
| XL-Base   |  | 1.00                                                    | 0.80   | 1.00    | 0.55   | 0.54   | 0.64   | 0.55     | 0.74     | 0.76     | 0.60      | 0.86    | 0.85     | 0.84    | 1.00     | 1.00     | 1.00     | 0.21   | 0.00    | 0.51     |
| XL-Light  |  | 0.79                                                    | 0.69   | 0.76    | 0.60   | 0.60   | 0.62   | 0.56     | 0.71     | 0.72     | 0.68      | 0.70    | 0.67     | 0.67    | 0.80     | 0.73     | 0.73     | 0.38   | 0.37    | 0.00     |

Table A20. Normalized Wasserstein Distance Matrix. Each column normalized by max distance to base models. ■ Short, ■ Medium-low, ■ Medium-high, ■ Long distance.

|           | Prompt: A Photo Of A Peaceful Animal In A Forest |        |         |        |        |        |          |          |          |           |         |          |         |          |          |          |        |         |          |
|-----------|--------------------------------------------------|--------|---------|--------|--------|--------|----------|----------|----------|-----------|---------|----------|---------|----------|----------|----------|--------|---------|----------|
|           | Flux                                             |        |         | Kand   |        |        | SD1.5    |          |          |           | SD2.1   |          |         | SD3      |          |          | SDXL   |         |          |
|           | F-Base                                           | F-LoRA | F-Turbo | K-Base | K-Naru | K-Poke | 1.5-v1.2 | 1.5-v1.4 | 1.5-Base | 1.5-Dream | 2.1-DPO | 2.1-Base | 2.1-Art | SD3-Real | SD3-Base | SD3-Anim | XL-DPO | XL-Base | XL-Light |
| F-Base    | 0.00                                             | 0.65   | 0.28    | 0.57   | 0.57   | 0.58   | 0.94     | 1.00     | 0.96     | 0.86      | 0.92    | 1.00     | 1.00    | 0.91     | 0.79     | 0.79     | 0.84   | 0.89    | 0.84     |
| F-LoRA    | 0.56                                             | 0.00   | 0.58    | 0.66   | 0.67   | 0.81   | 0.84     | 0.84     | 0.82     | 0.76      | 0.85    | 0.83     | 0.82    | 0.86     | 0.71     | 0.72     | 0.71   | 0.68    | 0.59     |
| F-Turbo   | 0.26                                             | 0.63   | 0.00    | 0.60   | 0.59   | 0.54   | 0.85     | 0.89     | 0.88     | 0.82      | 0.87    | 0.94     | 0.93    | 0.79     | 0.66     | 0.66     | 0.77   | 0.84    | 0.78     |
| K-Base    | 0.69                                             | 0.93   | 0.77    | 0.00   | 0.14   | 0.45   | 0.91     | 0.93     | 0.92     | 0.80      | 0.95    | 0.98     | 0.97    | 1.00     | 1.00     | 1.00     | 0.86   | 0.89    | 0.88     |
| K-Naru    | 0.65                                             | 0.89   | 0.71    | 0.13   | 0.00   | 0.40   | 0.84     | 0.85     | 0.81     | 0.71      | 0.91    | 0.94     | 0.94    | 0.88     | 0.94     | 0.94     | 0.81   | 0.85    | 0.84     |
| K-Poke    | 0.64                                             | 1.04   | 0.64    | 0.41   | 0.39   | 0.00   | 0.93     | 0.92     | 0.87     | 0.66      | 0.98    | 1.02     | 1.01    | 0.84     | 0.91     | 0.90     | 0.85   | 0.92    | 0.92     |
| 1.5-v1.2  | 0.83                                             | 0.85   | 0.80    | 0.66   | 0.65   | 0.75   | 0.00     | 0.57     | 0.55     | 0.62      | 0.82    | 0.70     | 0.71    | 0.66     | 0.73     | 0.72     | 0.88   | 0.88    | 0.83     |
| 1.5-v1.4  | 0.88                                             | 0.86   | 0.83    | 0.68   | 0.65   | 0.73   | 0.57     | 0.00     | 0.50     | 0.62      | 0.73    | 0.68     | 0.69    | 0.58     | 0.71     | 0.70     | 0.88   | 0.88    | 0.87     |
| 1.5-Base  | 0.96                                             | 0.95   | 0.93    | 0.76   | 0.70   | 0.78   | 0.62     | 0.57     | 0.00     | 0.62      | 0.91    | 0.82     | 0.82    | 0.65     | 0.82     | 0.81     | 0.97   | 0.95    | 0.93     |
| 1.5-Dream | 0.90                                             | 0.91   | 0.91    | 0.69   | 0.64   | 0.62   | 0.73     | 0.74     | 0.65     | 0.00      | 0.93    | 0.81     | 0.81    | 0.61     | 0.86     | 0.84     | 0.81   | 0.81    | 0.84     |
| 2.1-DPO   | 0.81                                             | 0.86   | 0.81    | 0.69   | 0.70   | 0.78   | 0.81     | 0.73     | 0.80     | 0.78      | 0.00    | 0.47     | 0.48    | 0.73     | 0.72     | 0.72     | 0.96   | 0.95    | 0.94     |
| 2.1-Base  | 1.00                                             | 0.95   | 1.00    | 0.81   | 0.82   | 0.92   | 0.80     | 0.77     | 0.82     | 0.78      | 0.54    | 0.00     | 0.01    | 0.69     | 0.68     | 0.68     | 1.00   | 1.00    | 1.00     |
| 2.1-Art   | 1.01                                             | 0.95   | 1.00    | 0.80   | 0.82   | 0.92   | 0.81     | 0.78     | 0.83     | 0.78      | 0.55    | 0.01     | 0.00    | 0.70     | 0.69     | 0.69     | 1.00   | 1.00    | 1.01     |
| SD3-Real  | 1.42                                             | 1.55   | 1.31    | 1.28   | 1.19   | 1.18   | 1.16     | 1.02     | 1.02     | 0.90      | 1.29    | 1.07     | 1.08    | 0.00     | 0.76     | 0.72     | 1.32   | 1.37    | 1.47     |
| SD3-Base  | 0.96                                             | 1.00   | 0.86    | 1.00   | 1.00   | 1.00   | 1.00     | 0.99     | 1.00     | 1.00      | 1.00    | 0.83     | 0.84    | 0.59     | 0.00     | 0.00     | 0.75   | 0.79    | 0.81     |
| SD3-Anim  | 0.97                                             | 1.02   | 0.86    | 1.01   | 1.00   | 0.99   | 1.00     | 0.98     | 0.99     | 0.99      | 1.01    | 0.83     | 0.84    | 0.57     | 0.00     | 0.00     | 0.76   | 0.80    | 0.82     |
| XL-DPO    | 0.65                                             | 0.63   | 0.63    | 0.55   | 0.55   | 0.60   | 0.77     | 0.78     | 0.76     | 0.60      | 0.85    | 0.78     | 0.77    | 0.66     | 0.48     | 0.48     | 0.00   | 0.20    | 0.31     |
| XL-Base   | 0.69                                             | 0.60   | 0.69    | 0.57   | 0.57   | 0.65   | 0.78     | 0.78     | 0.74     | 0.60      | 0.84    | 0.78     | 0.77    | 0.68     | 0.50     | 0.50     | 0.20   | 0.00    | 0.28     |
| XL-Light  | 0.68                                             | 0.55   | 0.67    | 0.58   | 0.59   | 0.67   | 0.76     | 0.80     | 0.75     | 0.65      | 0.86    | 0.81     | 0.81    | 0.76     | 0.53     | 0.54     | 0.32   | 0.29    | 0.00     |

Table A21. Normalized Wasserstein Distance Matrix. Each column normalized by max distance to base models. ■ Short, ■ Medium-low, ■ Medium-high, ■ Long distance.

|           | Prompt: A Photo Of A Peaceful Animal In A Grassland |        |         |        |        |        |          |          |          |           |         |          |         |          |          |          |        |         |          |
|-----------|-----------------------------------------------------|--------|---------|--------|--------|--------|----------|----------|----------|-----------|---------|----------|---------|----------|----------|----------|--------|---------|----------|
|           | Flux                                                |        |         | Kand   |        |        | SD1.5    |          |          |           | SD2.1   |          |         | SD3      |          |          | SDXL   |         |          |
|           | F-Base                                              | F-LoRA | F-Turbo | K-Base | K-Naru | K-Poke | 1.5-v1.2 | 1.5-v1.4 | 1.5-Base | 1.5-Dream | 2.1-DPO | 2.1-Base | 2.1-Art | SD3-Real | SD3-Base | SD3-Anim | XL-DPO | XL-Base | XL-Light |
| F-Base    | 0.00                                                | 0.36   | 0.21    | 0.80   | 0.78   | 0.82   | 0.98     | 0.92     | 0.87     | 1.00      | 1.00    | 1.00     | 1.00    | 0.68     | 0.47     | 0.49     | 0.68   | 0.62    | 0.66     |
| F-LoRA    | 0.35                                                | 0.00   | 0.36    | 0.94   | 0.93   | 1.06   | 1.02     | 0.85     | 0.87     | 1.04      | 0.98    | 0.96     | 0.96    | 0.77     | 0.65     | 0.67     | 0.73   | 0.63    | 0.58     |
| F-Turbo   | 0.22                                                | 0.39   | 0.00    | 0.86   | 0.86   | 0.85   | 0.99     | 0.95     | 0.88     | 1.03      | 1.04    | 1.03     | 1.02    | 0.70     | 0.46     | 0.47     | 0.72   | 0.67    | 0.67     |
| K-Base    | 0.80                                                | 0.97   | 0.83    | 0.00   | 0.14   | 0.54   | 1.00     | 1.00     | 1.00     | 0.77      | 0.98    | 0.99     | 0.98    | 1.00     | 1.00     | 1.00     | 1.00   | 1.00    | 1.00     |
| K-Naru    | 0.73                                                | 0.91   | 0.78    | 0.13   | 0.00   | 0.54   | 0.94     | 0.94     | 0.94     | 0.74      | 0.94    | 0.94     | 0.93    | 0.95     | 0.93     | 0.93     | 0.94   | 0.94    | 0.95     |
| K-Poke    | 0.70                                                | 0.94   | 0.71    | 0.46   | 0.49   | 0.00   | 0.85     | 0.88     | 0.83     | 0.72      | 0.80    | 0.86     | 0.86    | 0.65     | 0.68     | 0.68     | 0.80   | 0.85    | 0.98     |
| 1.5-v1.2  | 0.93                                                | 1.00   | 0.91    | 0.95   | 0.94   | 0.94   | 0.00     | 0.57     | 0.55     | 0.54      | 0.71    | 0.73     | 0.74    | 0.65     | 0.90     | 0.89     | 1.00   | 0.87    | 1.08     |
| 1.5-v1.4  | 0.89                                                | 0.85   | 0.90    | 0.97   | 0.97   | 0.99   | 0.58     | 0.00     | 0.40     | 0.64      | 0.60    | 0.60     | 0.62    | 0.53     | 0.81     | 0.81     | 0.81   | 0.71    | 0.83     |
| 1.5-Base  | 0.87                                                | 0.90   | 0.86    | 1.00   | 0.99   | 0.97   | 0.58     | 0.42     | 0.00     | 0.64      | 0.62    | 0.66     | 0.67    | 0.51     | 0.78     | 0.77     | 0.85   | 0.77    | 0.90     |
| 1.5-Dream | 1.26                                                | 1.36   | 1.27    | 0.98   | 0.99   | 1.06   | 0.73     | 0.84     | 0.81     | 0.00      | 0.84    | 0.83     | 0.85    | 0.89     | 1.19     | 1.19     | 1.32   | 1.23    | 1.42     |
| 2.1-DPO   | 1.12                                                | 1.14   | 1.13    | 1.10   | 1.12   | 1.04   | 0.85     | 0.69     | 0.70     | 0.74      | 0.00    | 0.36     | 0.37    | 0.54     | 0.91     | 0.90     | 0.84   | 0.77    | 0.97     |
| 2.1-Base  | 1.00                                                | 1.00   | 1.00    | 0.99   | 1.00   | 1.00   | 0.77     | 0.63     | 0.66     | 0.66      | 0.32    | 0.00     | 0.03    | 0.58     | 0.86     | 0.85     | 0.85   | 0.78    | 0.95     |
| 2.1-Art   | 1.00                                                | 1.00   | 1.00    | 0.98   | 0.99   | 1.01   | 0.79     | 0.64     | 0.68     | 0.67      | 0.33    | 0.03     | 0.00    | 0.60     | 0.88     | 0.88     | 0.88   | 0.80    | 0.96     |
| SD3-Real  | 0.84                                                | 0.99   | 0.84    | 1.25   | 1.25   | 0.95   | 0.86     | 0.68     | 0.64     | 0.88      | 0.60    | 0.73     | 0.75    | 0.00     | 0.51     | 0.49     | 0.79   | 0.73    | 0.96     |
| SD3-Base  | 0.45                                                | 0.64   | 0.42    | 0.96   | 0.95   | 0.76   | 0.90     | 0.80     | 0.75     | 0.90      | 0.77    | 0.82     | 0.84    | 0.39     | 0.00     | 0.00     | 0.61   | 0.60    | 0.68     |
| SD3-Anim  | 0.47                                                | 0.66   | 0.44    | 0.96   | 0.95   | 0.75   | 0.90     | 0.80     | 0.74     | 0.90      | 0.76    | 0.81     | 0.83    | 0.38     | 0.00     | 0.00     | 0.60   | 0.60    | 0.68     |
| XL-DPO    | 0.49                                                | 0.54   | 0.50    | 0.72   | 0.72   | 0.67   | 0.76     | 0.60     | 0.61     | 0.75      | 0.54    | 0.61     | 0.63    | 0.45     | 0.46     | 0.45     | 0.00   | 0.25    | 0.45     |
| XL-Base   | 0.50                                                | 0.53   | 0.53    | 0.81   | 0.81   | 0.81   | 0.75     | 0.60     | 0.62     | 0.79      | 0.56    | 0.63     | 0.64    | 0.47     | 0.51     | 0.51     | 0.28   | 0.00    | 0.45     |
| XL-Light  | 0.54                                                | 0.49   | 0.53    | 0.82   | 0.82   | 0.94   | 0.93     | 0.71     | 0.74     | 0.92      | 0.70    | 0.78     | 0.78    | 0.63     | 0.58     | 0.59     | 0.51   | 0.45    | 0.00     |

Table A22. Normalized Wasserstein Distance Matrix. Each column normalized by max distance to base models. ■ Short, ■ Medium-low, ■ Medium-high, ■ Long distance.

| Prompt: A Photo Of A Savory Baked Good Against A Brick Wall |        |        |         |        |        |        |          |          |          |           |         |          |         |          |          |          |        |         |          |
|-------------------------------------------------------------|--------|--------|---------|--------|--------|--------|----------|----------|----------|-----------|---------|----------|---------|----------|----------|----------|--------|---------|----------|
|                                                             | Flux   |        |         | Kand   |        |        | SD1.5    |          |          |           | SD2.1   |          |         | SD3      |          |          | SDXL   |         |          |
|                                                             | F-Base | F-LoRA | F-Turbo | K-Base | K-Naru | K-Poke | 1.5-v1.2 | 1.5-v1.4 | 1.5-Base | 1.5-Dream | 2.1-DPO | 2.1-Base | 2.1-Art | SD3-Real | SD3-Base | SD3-Anim | XL-DPO | XL-Base | XL-Light |
| F-Base                                                      | 0.00   | 0.11   | 0.11    | 1.00   | 1.00   | 1.00   | 1.00     | 0.56     | 0.66     | 0.71      | 0.76    | 1.00     | 1.00    | 0.34     | 0.48     | 0.51     | 0.93   | 0.91    | 1.00     |
| F-LoRA                                                      | 0.13   | 0.00   | 0.18    | 1.16   | 1.17   | 1.12   | 1.16     | 0.65     | 0.76     | 0.94      | 0.79    | 1.07     | 1.06    | 0.27     | 0.38     | 0.41     | 0.94   | 0.93    | 1.08     |
| F-Turbo                                                     | 0.09   | 0.14   | 0.00    | 0.87   | 0.87   | 0.84   | 0.85     | 0.46     | 0.55     | 0.68      | 0.64    | 0.82     | 0.82    | 0.32     | 0.43     | 0.45     | 0.81   | 0.79    | 0.83     |
| K-Base                                                      | 1.00   | 1.00   | 1.00    | 0.00   | 0.06   | 0.31   | 0.95     | 1.00     | 1.00     | 0.86      | 1.00    | 0.56     | 0.59    | 1.00     | 1.00     | 1.00     | 1.00   | 1.00    | 0.67     |
| K-Naru                                                      | 0.94   | 0.95   | 0.94    | 0.06   | 0.00   | 0.30   | 0.89     | 0.94     | 0.94     | 0.80      | 0.96    | 0.56     | 0.58    | 0.97     | 0.96     | 0.96     | 0.96   | 0.96    | 0.64     |
| K-Poke                                                      | 0.72   | 0.69   | 0.69    | 0.23   | 0.23   | 0.00   | 0.75     | 0.64     | 0.69     | 0.78      | 0.54    | 0.36     | 0.38    | 0.62     | 0.62     | 0.61     | 0.52   | 0.51    | 0.32     |
| 1.5-v1.2                                                    | 0.43   | 0.43   | 0.42    | 0.41   | 0.41   | 0.45   | 0.00     | 0.28     | 0.27     | 0.39      | 0.54    | 0.44     | 0.43    | 0.46     | 0.46     | 0.47     | 0.50   | 0.47    | 0.43     |
| 1.5-v1.4                                                    | 0.30   | 0.29   | 0.28    | 0.53   | 0.53   | 0.47   | 0.34     | 0.00     | 0.21     | 0.43      | 0.49    | 0.49     | 0.48    | 0.34     | 0.39     | 0.40     | 0.45   | 0.42    | 0.42     |
| 1.5-Base                                                    | 0.33   | 0.33   | 0.32    | 0.50   | 0.50   | 0.48   | 0.31     | 0.20     | 0.00     | 0.36      | 0.50    | 0.48     | 0.48    | 0.38     | 0.41     | 0.42     | 0.48   | 0.46    | 0.44     |
| 1.5-Dream                                                   | 0.46   | 0.52   | 0.50    | 0.55   | 0.54   | 0.70   | 0.59     | 0.52     | 0.47     | 0.00      | 0.98    | 0.87     | 0.88    | 0.73     | 0.78     | 0.80     | 1.02   | 0.98    | 0.84     |
| 2.1-DPO                                                     | 0.38   | 0.34   | 0.37    | 0.50   | 0.51   | 0.38   | 0.63     | 0.46     | 0.50     | 0.76      | 0.00    | 0.20     | 0.20    | 0.25     | 0.30     | 0.30     | 0.36   | 0.36    | 0.37     |
| 2.1-Base                                                    | 0.56   | 0.51   | 0.52    | 0.31   | 0.33   | 0.28   | 0.57     | 0.51     | 0.54     | 0.75      | 0.22    | 0.00     | 0.01    | 0.41     | 0.41     | 0.41     | 0.39   | 0.38    | 0.32     |
| 2.1-Art                                                     | 0.55   | 0.50   | 0.52    | 0.32   | 0.34   | 0.29   | 0.55     | 0.50     | 0.53     | 0.75      | 0.21    | 0.01     | 0.00    | 0.39     | 0.39     | 0.39     | 0.39   | 0.38    | 0.32     |
| SD3-Real                                                    | 0.31   | 0.21   | 0.33    | 0.91   | 0.94   | 0.78   | 0.97     | 0.60     | 0.70     | 1.03      | 0.45    | 0.67     | 0.66    | 0.00     | 0.17     | 0.18     | 0.55   | 0.57    | 0.69     |
| SD3-Base                                                    | 0.40   | 0.27   | 0.41    | 0.83   | 0.84   | 0.71   | 0.89     | 0.61     | 0.68     | 1.00      | 0.49    | 0.61     | 0.60    | 0.15     | 0.00     | 0.00     | 0.57   | 0.59    | 0.66     |
| SD3-Anim                                                    | 0.41   | 0.28   | 0.42    | 0.81   | 0.82   | 0.69   | 0.88     | 0.61     | 0.67     | 1.00      | 0.48    | 0.59     | 0.58    | 0.16     | 0.00     | 0.00     | 0.56   | 0.58    | 0.64     |
| XL-DPO                                                      | 0.42   | 0.37   | 0.42    | 0.46   | 0.46   | 0.33   | 0.53     | 0.39     | 0.44     | 0.72      | 0.32    | 0.32     | 0.32    | 0.27     | 0.32     | 0.31     | 0.00   | 0.17    | 0.25     |
| XL-Base                                                     | 0.42   | 0.37   | 0.41    | 0.46   | 0.47   | 0.32   | 0.49     | 0.36     | 0.42     | 0.69      | 0.33    | 0.31     | 0.32    | 0.28     | 0.32     | 0.32     | 0.17   | 0.00    | 0.24     |
| XL-Light                                                    | 0.53   | 0.49   | 0.50    | 0.35   | 0.36   | 0.24   | 0.52     | 0.42     | 0.47     | 0.69      | 0.39    | 0.30     | 0.31    | 0.40     | 0.42     | 0.42     | 0.29   | 0.28    | 0.00     |

Table A23. Normalized Wasserstein Distance Matrix. Each column normalized by max distance to base models. ■ Short, ■ Medium-low, ■ Medium-high, ■ Long distance.

| Prompt: A Photo Of A Savory Baked Good On A Dark Wood Surface |        |        |         |        |        |        |          |          |          |           |         |          |         |          |          |          |        |         |          |
|---------------------------------------------------------------|--------|--------|---------|--------|--------|--------|----------|----------|----------|-----------|---------|----------|---------|----------|----------|----------|--------|---------|----------|
|                                                               | Flux   |        |         | Kand   |        |        | SD1.5    |          |          |           | SD2.1   |          |         | SD3      |          |          | SDXL   |         |          |
|                                                               | F-Base | F-LoRA | F-Turbo | K-Base | K-Naru | K-Poke | 1.5-v1.2 | 1.5-v1.4 | 1.5-Base | 1.5-Dream | 2.1-DPO | 2.1-Base | 2.1-Art | SD3-Real | SD3-Base | SD3-Anim | XL-DPO | XL-Base | XL-Light |
| F-Base                                                        | 0.00   | 0.20   | 0.18    | 1.00   | 1.00   | 0.93   | 1.00     | 0.87     | 1.00     | 0.32      | 1.00    | 1.00     | 1.00    | 0.35     | 0.81     | 0.82     | 1.00   | 1.00    | 1.00     |
| F-LoRA                                                        | 0.16   | 0.00   | 0.22    | 0.84   | 0.86   | 0.68   | 0.81     | 0.65     | 0.75     | 0.30      | 0.79    | 0.77     | 0.76    | 0.32     | 0.59     | 0.59     | 0.78   | 0.79    | 0.86     |
| F-Turbo                                                       | 0.14   | 0.22   | 0.00    | 0.74   | 0.77   | 0.69   | 0.78     | 0.69     | 0.77     | 0.37      | 0.80    | 0.76     | 0.76    | 0.42     | 0.67     | 0.68     | 0.79   | 0.78    | 0.81     |
| K-Base                                                        | 0.80   | 0.85   | 0.76    | 0.00   | 0.09   | 0.78   | 0.43     | 1.00     | 0.90     | 0.94      | 0.68    | 0.52     | 0.51    | 0.96     | 1.00     | 1.00     | 0.32   | 0.31    | 0.28     |
| K-Naru                                                        | 0.89   | 0.98   | 0.87    | 0.10   | 0.00   | 0.99   | 0.49     | 1.18     | 1.07     | 1.06      | 0.77    | 0.61     | 0.60    | 1.07     | 1.16     | 1.17     | 0.35   | 0.33    | 0.28     |
| K-Poke                                                        | 0.39   | 0.36   | 0.37    | 0.41   | 0.46   | 0.00   | 0.39     | 0.42     | 0.46     | 0.38      | 0.39    | 0.37     | 0.36    | 0.48     | 0.47     | 0.47     | 0.41   | 0.42    | 0.49     |
| 1.5-v1.2                                                      | 0.71   | 0.73   | 0.71    | 0.39   | 0.39   | 0.67   | 0.00     | 0.56     | 0.54     | 0.65      | 0.41    | 0.35     | 0.35    | 0.78     | 0.64     | 0.63     | 0.21   | 0.21    | 0.27     |
| 1.5-v1.4                                                      | 0.38   | 0.37   | 0.39    | 0.55   | 0.58   | 0.44   | 0.35     | 0.00     | 0.34     | 0.31      | 0.39    | 0.36     | 0.36    | 0.46     | 0.46     | 0.45     | 0.43   | 0.44    | 0.52     |
| 1.5-Base                                                      | 0.40   | 0.38   | 0.40    | 0.45   | 0.48   | 0.44   | 0.31     | 0.31     | 0.00     | 0.38      | 0.34    | 0.34     | 0.33    | 0.52     | 0.48     | 0.48     | 0.38   | 0.39    | 0.45     |
| 1.5-Dream                                                     | 0.29   | 0.34   | 0.42    | 1.05   | 1.07   | 0.82   | 0.82     | 0.63     | 0.86     | 0.00      | 0.81    | 0.88     | 0.86    | 0.24     | 0.73     | 0.72     | 0.89   | 0.90    | 0.91     |
| 2.1-DPO                                                       | 0.49   | 0.49   | 0.51    | 0.42   | 0.43   | 0.47   | 0.29     | 0.43     | 0.42     | 0.45      | 0.00    | 0.20     | 0.20    | 0.60     | 0.50     | 0.50     | 0.30   | 0.31    | 0.39     |
| 2.1-Base                                                      | 0.54   | 0.53   | 0.52    | 0.35   | 0.37   | 0.47   | 0.26     | 0.44     | 0.45     | 0.53      | 0.22    | 0.00     | 0.03    | 0.66     | 0.54     | 0.54     | 0.28   | 0.28    | 0.35     |
| 2.1-Art                                                       | 0.54   | 0.52   | 0.52    | 0.35   | 0.36   | 0.47   | 0.26     | 0.44     | 0.45     | 0.52      | 0.21    | 0.03     | 0.00    | 0.66     | 0.53     | 0.53     | 0.27   | 0.27    | 0.35     |
| SD3-Real                                                      | 0.52   | 0.62   | 0.82    | 1.80   | 1.81   | 1.73   | 1.66     | 1.86     | 1.96     | 0.41      | 1.82    | 1.86     | 1.84    | 0.00     | 1.35     | 1.32     | 1.52   | 1.51    | 1.48     |
| SD3-Base                                                      | 0.40   | 0.37   | 0.42    | 0.62   | 0.64   | 0.56   | 0.44     | 0.51     | 0.59     | 0.40      | 0.50    | 0.49     | 0.48    | 0.44     | 0.00     | 0.00     | 0.40   | 0.41    | 0.55     |
| SD3-Anim                                                      | 0.41   | 0.37   | 0.43    | 0.62   | 0.65   | 0.56   | 0.44     | 0.51     | 0.59     | 0.40      | 0.50    | 0.50     | 0.49    | 0.43     | 0.00     | 0.00     | 0.39   | 0.41    | 0.55     |
| XL-DPO                                                        | 0.95   | 0.94   | 0.96    | 0.38   | 0.37   | 0.93   | 0.28     | 0.93     | 0.89     | 0.95      | 0.58    | 0.49     | 0.48    | 0.96     | 0.76     | 0.76     | 0.00   | 0.07    | 0.18     |
| XL-Base                                                       | 1.00   | 1.00   | 1.00    | 0.39   | 0.36   | 1.00   | 0.30     | 0.99     | 0.96     | 1.00      | 0.63    | 0.51     | 0.51    | 1.00     | 0.83     | 0.82     | 0.07   | 0.00    | 0.17     |
| XL-Light                                                      | 1.44   | 1.57   | 1.48    | 0.51   | 0.44   | 1.69   | 0.55     | 1.68     | 1.61     | 1.45      | 1.13    | 0.94     | 0.93    | 1.41     | 1.60     | 1.59     | 0.28   | 0.24    | 0.00     |

Table A24. Normalized Wasserstein Distance Matrix. Each column normalized by max distance to base models. ■ Short, ■ Medium-low, ■ Medium-high, ■ Long distance.

| Prompt: A Photo Of A Savory Baked Good On A Dimmed Studio |        |        |         |        |        |        |          |          |          |           |         |          |         |          |          |          |        |         |          |
|-----------------------------------------------------------|--------|--------|---------|--------|--------|--------|----------|----------|----------|-----------|---------|----------|---------|----------|----------|----------|--------|---------|----------|
|                                                           | Flux   |        |         | Kand   |        |        | SD1.5    |          |          |           | SD2.1   |          |         | SD3      |          |          | SDXL   |         |          |
|                                                           | F-Base | F-LoRA | F-Turbo | K-Base | K-Naru | K-Poke | 1.5-v1.2 | 1.5-v1.4 | 1.5-Base | 1.5-Dream | 2.1-DPO | 2.1-Base | 2.1-Art | SD3-Real | SD3-Base | SD3-Anim | XL-DPO | XL-Base | XL-Light |
| F-Base                                                    | 0.00   | 0.43   | 0.37    | 1.00   | 1.00   | 0.82   | 1.00     | 1.00     | 1.00     | 0.63      | 0.82    | 1.00     | 1.00    | 0.38     | 0.57     | 0.57     | 1.00   | 1.00    | 1.00     |
| F-LoRA                                                    | 0.29   | 0.00   | 0.41    | 0.71   | 0.74   | 0.56   | 0.65     | 0.63     | 0.65     | 0.56      | 0.51    | 0.61     | 0.60    | 0.39     | 0.48     | 0.47     | 0.55   | 0.57    | 0.65     |
| F-Turbo                                                   | 0.26   | 0.43   | 0.00    | 0.63   | 0.64   | 0.54   | 0.69     | 0.68     | 0.71     | 0.61      | 0.64    | 0.67     | 0.68    | 0.44     | 0.53     | 0.53     | 0.72   | 0.70    | 0.67     |
| K-Base                                                    | 0.95   | 1.00   | 0.84    | 0.00   | 0.14   | 0.43   | 0.47     | 0.92     | 0.97     | 0.91      | 1.00    | 0.71     | 0.70    | 1.00     | 1.00     | 1.00     | 0.59   | 0.49    | 0.39     |
| K-Naru                                                    | 0.96   | 1.05   | 0.87    | 0.15   | 0.00   | 0.51   | 0.52     | 0.97     | 1.06     | 0.93      | 1.08    | 0.80     | 0.78    | 1.00     | 1.02     | 1.02     | 0.65   | 0.56    | 0.41     |
| K-Poke                                                    | 0.62   | 0.63   | 0.58    | 0.34   | 0.40   | 0.00   | 0.47     | 0.66     | 0.68     | 0.70      | 0.67    | 0.51     | 0.49    | 0.78     | 0.83     | 0.83     | 0.50   | 0.45    | 0.43     |
| 1.5-v1.2                                                  | 1.15   | 1.11   | 1.13    | 0.57   | 0.62   | 0.71   | 0.00     | 0.68     | 0.75     | 1.06      | 0.78    | 0.49     | 0.48    | 0.96     | 0.85     | 0.85     | 0.37   | 0.28    | 0.27     |
| 1.5-v1.4                                                  | 0.54   | 0.51   | 0.53    | 0.53   | 0.55   | 0.47   | 0.32     | 0.00     | 0.37     | 0.64      | 0.43    | 0.36     | 0.36    | 0.51     | 0.52     | 0.52     | 0.37   | 0.36    | 0.41     |
| 1.5-Base                                                  | 0.51   | 0.50   | 0.51    | 0.53   | 0.57   | 0.46   | 0.33     | 0.35     | 0.00     | 0.55      | 0.40    | 0.35     | 0.36    | 0.50     | 0.50     | 0.50     | 0.39   | 0.39    | 0.40     |
| 1.5-Dream                                                 | 0.48   | 0.63   | 0.65    | 0.72   | 0.73   | 0.69   | 0.69     | 0.88     | 0.81     | 0.00      | 0.77    | 0.86     | 0.86    | 0.52     | 0.64     | 0.63     | 0.74   | 0.75    | 0.62     |
| 2.1-DPO                                                   | 0.46   | 0.43   | 0.51    | 0.60   | 0.64   | 0.50   | 0.38     | 0.44     | 0.44     | 0.58      | 0.00    | 0.27     | 0.27    | 0.42     | 0.43     | 0.43     | 0.38   | 0.38    | 0.44     |
| 2.1-Base                                                  | 0.67   | 0.60   | 0.64    | 0.50   | 0.56   | 0.45   | 0.28     | 0.44     | 0.46     | 0.77      | 0.32    | 0.00     | 0.02    | 0.60     | 0.54     | 0.55     | 0.35   | 0.31    | 0.35     |
| 2.1-Art                                                   | 0.69   | 0.61   | 0.66    | 0.51   | 0.56   | 0.44   | 0.28     | 0.45     | 0.48     | 0.79      | 0.32    | 0.02     | 0.00    | 0.62     | 0.56     | 0.57     | 0.35   | 0.31    | 0.35     |
| SD3-Real                                                  | 0.40   | 0.61   | 0.66    | 1.11   | 1.09   | 1.08   | 0.87     | 0.98     | 1.02     | 0.72      | 0.79    | 0.94     | 0.95    | 0.00     | 0.27     | 0.27     | 0.93   | 0.94    | 0.95     |
| SD3-Base                                                  | 0.52   | 0.65   | 0.69    | 0.96   | 0.96   | 1.00   | 0.67     | 0.87     | 0.89     | 0.78      | 0.70    | 0.74     | 0.75    | 0.23     | 0.00     | 0.00     | 0.79   | 0.74    | 0.80     |
| SD3-Anim                                                  | 0.52   | 0.64   | 0.69    | 0.97   | 0.97   | 1.00   | 0.68     | 0.88     | 0.89     | 0.77      | 0.70    | 0.75     | 0.76    | 0.23     | 0.00     | 0.00     | 0.79   | 0.75    | 0.80     |
| XL-DPO                                                    | 0.84   | 0.68   | 0.86    | 0.52   | 0.57   | 0.55   | 0.27     | 0.56     | 0.63     | 0.82      | 0.57    | 0.43     | 0.42    | 0.74     | 0.72     | 0.72     | 0.00   | 0.11    | 0.25     |
| XL-Base                                                   | 1.00   | 0.84   | 1.00    | 0.52   | 0.58   | 0.59   | 0.24     | 0.67     | 0.76     | 1.00      | 0.67    | 0.46     | 0.45    | 0.89     | 0.82     | 0.82     | 0.13   | 0.00    | 0.22     |
| XL-Light                                                  | 1.17   | 1.13   | 1.11    | 0.48   | 0.50   | 0.67   | 0.28     | 0.88     | 0.92     | 0.96      | 0.91    | 0.61     | 0.59    | 1.05     | 1.02     | 1.02     | 0.35   | 0.26    | 0.00     |

Table A25. Normalized Wasserstein Distance Matrix. Each column normalized by max distance to base models. ■ Short, ■ Medium-low, ■ Medium-high, ■ Long distance.

| Prompt: A Photo Of A Savory Single Fruit On A Dimmed Studio |        |        |         |        |        |        |          |          |          |           |         |          |         |          |          |          |        |         |          |
|-------------------------------------------------------------|--------|--------|---------|--------|--------|--------|----------|----------|----------|-----------|---------|----------|---------|----------|----------|----------|--------|---------|----------|
|                                                             | Flux   |        |         | Kand   |        |        | SD1.5    |          |          |           | SD2.1   |          |         | SD3      |          |          | SDXL   |         |          |
|                                                             | F-Base | F-LoRA | F-Turbo | K-Base | K-Naru | K-Poke | 1.5-v1.2 | 1.5-v1.4 | 1.5-Base | 1.5-Dream | 2.1-DPO | 2.1-Base | 2.1-Art | SD3-Real | SD3-Base | SD3-Anim | XL-DPO | XL-Base | XL-Light |
| F-Base                                                      | 0.00   | 0.29   | 0.23    | 1.00   | 1.00   | 1.00   | 0.75     | 0.86     | 1.00     | 1.00      | 1.00    | 1.00     | 1.00    | 0.83     | 0.74     | 0.73     | 1.00   | 1.00    | 1.00     |
| F-LoRA                                                      | 0.25   | 0.00   | 0.28    | 0.78   | 0.80   | 0.89   | 0.73     | 0.79     | 0.89     | 0.90      | 0.84    | 0.83     | 0.84    | 0.72     | 0.65     | 0.66     | 0.89   | 0.85    | 0.92     |
| F-Turbo                                                     | 0.24   | 0.34   | 0.00    | 1.16   | 1.20   | 1.16   | 0.58     | 0.77     | 0.92     | 1.09      | 1.20    | 1.20     | 1.20    | 1.13     | 0.91     | 0.90     | 1.03   | 0.98    | 0.98     |
| K-Base                                                      | 0.91   | 0.83   | 1.00    | 0.00   | 0.21   | 0.54   | 1.00     | 1.00     | 0.96     | 0.71      | 0.56    | 0.56     | 0.59    | 0.69     | 0.92     | 0.98     | 0.71   | 0.70    | 0.96     |
| K-Naru                                                      | 0.87   | 0.82   | 0.99    | 0.20   | 0.00   | 0.50   | 1.01     | 1.00     | 0.96     | 0.72      | 0.53    | 0.51     | 0.54    | 0.63     | 0.88     | 0.93     | 0.69   | 0.69    | 0.93     |
| K-Poke                                                      | 1.70   | 1.78   | 1.87    | 1.02   | 0.97   | 0.00   | 1.79     | 1.86     | 1.78     | 1.25      | 0.66    | 0.80     | 0.82    | 1.14     | 1.58     | 1.70     | 0.98   | 1.04    | 1.58     |
| 1.5-v1.2                                                    | 1.12   | 1.27   | 0.82    | 1.63   | 1.72   | 1.56   | 0.00     | 0.39     | 0.59     | 1.13      | 1.70    | 1.74     | 1.76    | 1.79     | 1.56     | 1.54     | 1.11   | 0.96    | 1.19     |
| 1.5-v1.4                                                    | 0.93   | 1.00   | 0.79    | 1.19   | 1.24   | 1.19   | 0.29     | 0.00     | 0.44     | 0.78      | 1.20    | 1.23     | 1.25    | 1.26     | 1.13     | 1.12     | 0.85   | 0.75    | 0.95     |
| 1.5-Base                                                    | 0.89   | 0.94   | 0.78    | 0.95   | 0.99   | 0.94   | 0.36     | 0.37     | 0.00     | 0.63      | 0.92    | 0.94     | 0.95    | 1.00     | 1.00     | 1.00     | 0.66   | 0.57    | 0.77     |
| 1.5-Dream                                                   | 0.83   | 0.88   | 0.85    | 0.65   | 0.68   | 0.61   | 0.64     | 0.60     | 0.58     | 0.00      | 0.52    | 0.58     | 0.59    | 0.52     | 0.57     | 0.59     | 0.41   | 0.46    | 0.63     |
| 2.1-DPO                                                     | 0.86   | 0.85   | 0.97    | 0.53   | 0.52   | 0.33   | 0.99     | 0.95     | 0.88     | 0.53      | 0.00    | 0.23     | 0.23    | 0.43     | 0.63     | 0.68     | 0.48   | 0.52    | 0.73     |
| 2.1-Base                                                    | 0.81   | 0.80   | 0.92    | 0.51   | 0.48   | 0.38   | 0.96     | 0.93     | 0.86     | 0.57      | 0.22    | 0.00     | 0.01    | 0.48     | 0.70     | 0.75     | 0.50   | 0.55    | 0.76     |
| 2.1-Art                                                     | 0.79   | 0.79   | 0.90    | 0.52   | 0.49   | 0.38   | 0.95     | 0.92     | 0.85     | 0.57      | 0.21    | 0.01     | 0.00    | 0.48     | 0.69     | 0.74     | 0.49   | 0.54    | 0.74     |
| SD3-Real                                                    | 0.59   | 0.60   | 0.75    | 0.54   | 0.51   | 0.47   | 0.86     | 0.82     | 0.79     | 0.44      | 0.36    | 0.42     | 0.42    | 0.00     | 0.30     | 0.32     | 0.51   | 0.54    | 0.72     |
| SD3-Base                                                    | 0.50   | 0.51   | 0.58    | 0.68   | 0.67   | 0.62   | 0.71     | 0.70     | 0.75     | 0.46      | 0.49    | 0.58     | 0.58    | 0.28     | 0.00     | 0.01     | 0.58   | 0.57    | 0.73     |
| SD3-Anim                                                    | 0.48   | 0.51   | 0.56    | 0.71   | 0.70   | 0.66   | 0.68     | 0.68     | 0.74     | 0.47      | 0.52    | 0.61     | 0.61    | 0.30     | 0.01     | 0.00     | 0.59   | 0.59    | 0.74     |
| XL-DPO                                                      | 0.93   | 0.98   | 0.91    | 0.72   | 0.74   | 0.54   | 0.70     | 0.73     | 0.68     | 0.46      | 0.52    | 0.57     | 0.58    | 0.67     | 0.80     | 0.84     | 0.00   | 0.23    | 0.54     |
| XL-Base                                                     | 1.00   | 1.00   | 0.92    | 0.77   | 0.79   | 0.61   | 0.65     | 0.70     | 0.64     | 0.56      | 0.60    | 0.67     | 0.68    | 0.77     | 0.86     | 0.89     | 0.25   | 0.00    | 0.56     |
| XL-Light                                                    | 0.73   | 0.79   | 0.67    | 0.77   | 0.78   | 0.68   | 0.59     | 0.64     | 0.62     | 0.55      | 0.62    | 0.68     | 0.68    | 0.74     | 0.79     | 0.82     | 0.42   | 0.41    | 0.00     |

Table A26. Normalized Wasserstein Distance Matrix. Each column normalized by max distance to base models. ■ Short, ■ Medium-low, ■ Medium-high, ■ Long distance.

|           |  | Prompt: A Photo Of A Savory Single Fruit On A Dish |        |         |        |        |        |          |          |          |           |         |          |         |          |          |          |        |         |          |
|-----------|--|----------------------------------------------------|--------|---------|--------|--------|--------|----------|----------|----------|-----------|---------|----------|---------|----------|----------|----------|--------|---------|----------|
|           |  | Flux                                               |        |         | Kand   |        |        | SD1.5    |          |          |           | SD2.1   |          |         | SD3      |          |          | SDXL   |         |          |
|           |  | F-Base                                             | F-LoRA | F-Turbo | K-Base | K-Naru | K-Poke | 1.5-v1.2 | 1.5-v1.4 | 1.5-Base | 1.5-Dream | 2.1-DPO | 2.1-Base | 2.1-Art | SD3-Real | SD3-Base | SD3-Anim | XL-DPO | XL-Base | XL-Light |
| F-Base    |  | 0.00                                               | 0.28   | 0.33    | 0.76   | 0.90   | 1.00   | 0.63     | 0.98     | 0.91     | 0.93      | 1.00    | 1.00     | 1.00    | 1.00     | 1.00     | 1.00     | 1.00   | 1.00    | 1.00     |
| F-LoRA    |  | 0.22                                               | 0.00   | 0.29    | 0.65   | 0.79   | 0.79   | 0.58     | 0.81     | 0.79     | 0.79      | 0.79    | 0.75     | 0.76    | 0.82     | 0.77     | 0.77     | 0.81   | 0.80    | 0.85     |
| F-Turbo   |  | 0.27                                               | 0.30   | 0.00    | 0.60   | 0.72   | 0.70   | 0.54     | 0.80     | 0.74     | 0.79      | 0.80    | 0.81     | 0.80    | 0.86     | 0.83     | 0.83     | 0.85   | 0.82    | 0.88     |
| K-Base    |  | 0.51                                               | 0.54   | 0.49    | 0.00   | 0.25   | 0.49   | 0.43     | 0.60     | 0.56     | 0.63      | 0.59    | 0.60     | 0.60    | 0.73     | 0.71     | 0.71     | 0.65   | 0.60    | 0.69     |
| K-Naru    |  | 0.52                                               | 0.57   | 0.50    | 0.22   | 0.00   | 0.48   | 0.55     | 0.72     | 0.62     | 0.74      | 0.54    | 0.57     | 0.58    | 0.65     | 0.61     | 0.61     | 0.57   | 0.53    | 0.65     |
| K-Poke    |  | 0.70                                               | 0.69   | 0.60    | 0.51   | 0.58   | 0.00   | 0.68     | 0.81     | 0.79     | 0.88      | 0.51    | 0.61     | 0.62    | 0.68     | 0.62     | 0.61     | 0.52   | 0.53    | 0.78     |
| 1.5-v1.2  |  | 0.64                                               | 0.73   | 0.67    | 0.66   | 0.98   | 0.99   | 0.00     | 0.45     | 0.48     | 0.54      | 0.93    | 0.86     | 0.87    | 1.00     | 1.09     | 1.08     | 1.05   | 0.93    | 1.02     |
| 1.5-v1.4  |  | 0.68                                               | 0.70   | 0.67    | 0.62   | 0.87   | 0.80   | 0.30     | 0.00     | 0.32     | 0.40      | 0.62    | 0.60     | 0.61    | 0.68     | 0.73     | 0.73     | 0.68   | 0.61    | 0.75     |
| 1.5-Base  |  | 0.64                                               | 0.68   | 0.63    | 0.58   | 0.75   | 0.79   | 0.33     | 0.32     | 0.00     | 0.49      | 0.64    | 0.61     | 0.61    | 0.69     | 0.74     | 0.74     | 0.68   | 0.61    | 0.72     |
| 1.5-Dream |  | 0.59                                               | 0.62   | 0.61    | 0.59   | 0.81   | 0.79   | 0.34     | 0.37     | 0.44     | 0.00      | 0.60    | 0.59     | 0.61    | 0.65     | 0.67     | 0.67     | 0.67   | 0.60    | 0.67     |
| 2.1-DPO   |  | 0.89                                               | 0.87   | 0.87    | 0.78   | 0.83   | 0.65   | 0.81     | 0.80     | 0.81     | 0.84      | 0.00    | 0.25     | 0.25    | 0.31     | 0.31     | 0.32     | 0.26   | 0.25    | 0.54     |
| 2.1-Base  |  | 0.74                                               | 0.70   | 0.73    | 0.66   | 0.74   | 0.65   | 0.62     | 0.64     | 0.65     | 0.69      | 0.21    | 0.00     | 0.03    | 0.39     | 0.36     | 0.36     | 0.39   | 0.35    | 0.56     |
| 2.1-Art   |  | 0.74                                               | 0.70   | 0.72    | 0.66   | 0.75   | 0.66   | 0.63     | 0.65     | 0.65     | 0.71      | 0.21    | 0.03     | 0.00    | 0.38     | 0.37     | 0.37     | 0.40   | 0.36    | 0.55     |
| SD3-Real  |  | 1.22                                               | 1.24   | 1.27    | 1.34   | 1.39   | 1.19   | 1.19     | 1.20     | 1.21     | 1.25      | 0.43    | 0.63     | 0.63    | 0.00     | 0.29     | 0.30     | 0.42   | 0.40    | 1.06     |
| SD3-Base  |  | 0.94                                               | 0.91   | 0.95    | 1.00   | 1.00   | 0.83   | 1.00     | 1.00     | 1.00     | 1.00      | 0.33    | 0.46     | 0.47    | 0.23     | 0.00     | 0.00     | 0.37   | 0.36    | 0.82     |
| SD3-Anim  |  | 0.93                                               | 0.89   | 0.94    | 0.98   | 0.98   | 0.82   | 0.99     | 0.99     | 0.98     | 0.99      | 0.33    | 0.45     | 0.47    | 0.23     | 0.00     | 0.00     | 0.37   | 0.36    | 0.81     |
| XL-DPO    |  | 0.95                                               | 0.96   | 0.98    | 0.93   | 0.94   | 0.70   | 0.97     | 0.93     | 0.93     | 1.00      | 0.28    | 0.50     | 0.51    | 0.32     | 0.37     | 0.38     | 0.00   | 0.14    | 0.57     |
| XL-Base   |  | 1.00                                               | 1.00   | 1.00    | 0.90   | 0.92   | 0.76   | 0.91     | 0.88     | 0.88     | 0.95      | 0.29    | 0.47     | 0.49    | 0.33     | 0.38     | 0.38     | 0.15   | 0.00    | 0.60     |
| XL-Light  |  | 0.54                                               | 0.57   | 0.58    | 0.56   | 0.61   | 0.61   | 0.54     | 0.58     | 0.56     | 0.58      | 0.33    | 0.41     | 0.40    | 0.47     | 0.47     | 0.47     | 0.33   | 0.33    | 0.00     |

Table A27. Normalized Wasserstein Distance Matrix. Each column normalized by max distance to base models. ■ Short, ■ Medium-low, ■ Medium-high, ■ Long distance.

|           |  | Prompt: A Photo Of A Savory Single Fruit On A Wooden Floor |        |         |        |        |        |          |          |          |           |         |          |         |          |          |          |        |         |          |
|-----------|--|------------------------------------------------------------|--------|---------|--------|--------|--------|----------|----------|----------|-----------|---------|----------|---------|----------|----------|----------|--------|---------|----------|
|           |  | Flux                                                       |        |         | Kand   |        |        | SD1.5    |          |          |           | SD2.1   |          |         | SD3      |          |          | SDXL   |         |          |
|           |  | F-Base                                                     | F-LoRA | F-Turbo | K-Base | K-Naru | K-Poke | 1.5-v1.2 | 1.5-v1.4 | 1.5-Base | 1.5-Dream | 2.1-DPO | 2.1-Base | 2.1-Art | SD3-Real | SD3-Base | SD3-Anim | XL-DPO | XL-Base | XL-Light |
| F-Base    |  | 0.00                                                       | 0.27   | 0.28    | 0.64   | 0.64   | 0.50   | 0.58     | 0.65     | 0.80     | 1.00      | 0.96    | 0.77     | 0.77    | 0.81     | 0.78     | 0.78     | 0.89   | 1.00    | 0.69     |
| F-LoRA    |  | 0.27                                                       | 0.00   | 0.28    | 0.72   | 0.69   | 0.64   | 0.64     | 0.69     | 0.77     | 0.96      | 0.93    | 0.78     | 0.78    | 0.64     | 0.56     | 0.56     | 0.83   | 0.91    | 0.66     |
| F-Turbo   |  | 0.29                                                       | 0.30   | 0.00    | 0.94   | 0.91   | 0.81   | 0.49     | 0.56     | 0.71     | 1.10      | 0.89    | 0.69     | 0.69    | 0.86     | 0.83     | 0.83     | 0.85   | 0.94    | 0.81     |
| K-Base    |  | 0.60                                                       | 0.67   | 0.82    | 0.00   | 0.11   | 0.21   | 0.62     | 0.62     | 0.69     | 0.57      | 0.78    | 0.73     | 0.71    | 0.66     | 0.60     | 0.60     | 0.93   | 0.93    | 0.73     |
| K-Naru    |  | 0.65                                                       | 0.70   | 0.87    | 0.12   | 0.00   | 0.24   | 0.69     | 0.69     | 0.78     | 0.64      | 0.85    | 0.79     | 0.77    | 0.63     | 0.58     | 0.58     | 1.01   | 0.98    | 0.75     |
| K-Poke    |  | 0.54                                                       | 0.69   | 0.82    | 0.24   | 0.25   | 0.00   | 0.68     | 0.70     | 0.78     | 0.65      | 0.93    | 0.84     | 0.83    | 0.68     | 0.64     | 0.63     | 1.02   | 1.06    | 0.79     |
| 1.5-v1.2  |  | 1.15                                                       | 1.28   | 0.92    | 1.33   | 1.35   | 1.25   | 0.00     | 0.23     | 0.46     | 1.10      | 0.67    | 0.41     | 0.41    | 1.37     | 1.56     | 1.55     | 1.28   | 1.33    | 1.60     |
| 1.5-v1.4  |  | 1.02                                                       | 1.08   | 0.82    | 1.05   | 1.06   | 1.02   | 0.18     | 0.00     | 0.28     | 0.78      | 0.54    | 0.37     | 0.37    | 1.12     | 1.23     | 1.22     | 0.99   | 1.02    | 1.19     |
| 1.5-Base  |  | 0.91                                                       | 0.88   | 0.76    | 0.85   | 0.87   | 0.83   | 0.26     | 0.20     | 0.00     | 0.54      | 0.44    | 0.36     | 0.37    | 0.86     | 0.89     | 0.89     | 0.76   | 0.77    | 0.87     |
| 1.5-Dream |  | 0.94                                                       | 0.91   | 0.97    | 0.58   | 0.59   | 0.57   | 0.52     | 0.47     | 0.45     | 0.00      | 0.56    | 0.57     | 0.56    | 0.60     | 0.57     | 0.56     | 0.85   | 0.80    | 0.80     |
| 2.1-DPO   |  | 0.92                                                       | 0.90   | 0.80    | 0.80   | 0.81   | 0.83   | 0.32     | 0.33     | 0.37     | 0.57      | 0.00    | 0.17     | 0.17    | 0.80     | 0.75     | 0.75     | 0.65   | 0.64    | 0.82     |
| 2.1-Base  |  | 0.98                                                       | 1.00   | 0.83    | 1.00   | 1.00   | 1.00   | 0.26     | 0.30     | 0.41     | 0.77      | 0.22    | 0.00     | 0.02    | 1.00     | 1.00     | 1.00     | 0.78   | 0.79    | 1.00     |
| 2.1-Art   |  | 0.99                                                       | 1.02   | 0.85    | 0.99   | 0.98   | 1.00   | 0.27     | 0.30     | 0.42     | 0.77      | 0.22    | 0.02     | 0.00    | 1.01     | 1.01     | 1.01     | 0.80   | 0.81    | 1.02     |
| SD3-Real  |  | 1.96                                                       | 1.56   | 1.97    | 1.74   | 1.52   | 1.54   | 1.68     | 1.73     | 1.84     | 1.54      | 2.03    | 1.90     | 1.89    | 0.00     | 0.37     | 0.37     | 2.00   | 1.70    | 1.57     |
| SD3-Base  |  | 1.00                                                       | 0.72   | 1.00    | 0.83   | 0.73   | 0.76   | 1.00     | 1.00     | 1.00     | 0.77      | 1.00    | 1.00     | 1.00    | 0.19     | 0.00     | 0.00     | 1.00   | 0.88    | 0.77     |
| SD3-Anim  |  | 1.00                                                       | 0.73   | 1.00    | 0.82   | 0.73   | 0.75   | 1.00     | 1.00     | 1.00     | 0.76      | 1.00    | 1.00     | 1.00    | 0.19     | 0.00     | 0.00     | 1.00   | 0.88    | 0.77     |
| XL-DPO    |  | 0.65                                                       | 0.61   | 0.58    | 0.73   | 0.73   | 0.69   | 0.47     | 0.46     | 0.49     | 0.66      | 0.50    | 0.44     | 0.45    | 0.60     | 0.57     | 0.57     | 0.00   | 0.26    | 0.45     |
| XL-Base   |  | 0.79                                                       | 0.72   | 0.70    | 0.80   | 0.76   | 0.78   | 0.53     | 0.52     | 0.54     | 0.68      | 0.53    | 0.49     | 0.50    | 0.55     | 0.55     | 0.55     | 0.28   | 0.00    | 0.51     |
| XL-Light  |  | 0.53                                                       | 0.50   | 0.58    | 0.60   | 0.56   | 0.56   | 0.61     | 0.58     | 0.59     | 0.65      | 0.65    | 0.60     | 0.60    | 0.49     | 0.46     | 0.46     | 0.47   | 0.49    | 0.00     |

Table A28. Normalized Wasserstein Distance Matrix. Each column normalized by max distance to base models. ■ Short, ■ Medium-low, ■ Medium-high, ■ Long distance.

| Prompt: A Photo Of A Sweet Baked Good Against A Brick Wall |        |        |         |        |        |        |          |          |          |           |         |          |         |          |          |          |        |         |          |
|------------------------------------------------------------|--------|--------|---------|--------|--------|--------|----------|----------|----------|-----------|---------|----------|---------|----------|----------|----------|--------|---------|----------|
|                                                            | Flux   |        |         | Kand   |        |        | SD1.5    |          |          |           | SD2.1   |          |         | SD3      |          |          | SDXL   |         |          |
|                                                            | F-Base | F-LoRA | F-Turbo | K-Base | K-Naru | K-Poke | 1.5-v1.2 | 1.5-v1.4 | 1.5-Base | 1.5-Dream | 2.1-DPO | 2.1-Base | 2.1-Art | SD3-Real | SD3-Base | SD3-Anim | XL-DPO | XL-Base | XL-Light |
| F-Base                                                     | 0.00   | 0.22   | 0.23    | 1.00   | 0.70   | 0.51   | 1.00     | 1.00     | 1.00     | 0.90      | 1.00    | 1.00     | 1.00    | 0.41     | 0.71     | 0.74     | 0.88   | 1.00    | 0.68     |
| F-LoRA                                                     | 0.22   | 0.00   | 0.34    | 1.05   | 0.85   | 0.64   | 0.97     | 1.01     | 1.01     | 0.93      | 0.89    | 0.88     | 0.89    | 0.30     | 0.52     | 0.55     | 0.96   | 1.03    | 0.79     |
| F-Turbo                                                    | 0.19   | 0.28   | 0.00    | 0.78   | 0.62   | 0.50   | 0.84     | 0.84     | 0.83     | 0.83      | 0.80    | 0.79     | 0.79    | 0.42     | 0.67     | 0.69     | 0.67   | 0.76    | 0.51     |
| K-Base                                                     | 0.68   | 0.71   | 0.63    | 0.00   | 0.32   | 0.54   | 0.59     | 0.63     | 0.67     | 0.83      | 0.85    | 0.66     | 0.66    | 0.75     | 0.82     | 0.81     | 0.70   | 0.70    | 0.61     |
| K-Naru                                                     | 0.56   | 0.67   | 0.60    | 0.38   | 0.00   | 0.36   | 0.77     | 0.77     | 0.80     | 0.77      | 1.08    | 0.97     | 0.98    | 0.71     | 0.93     | 0.94     | 0.76   | 0.81    | 0.60     |
| K-Poke                                                     | 0.55   | 0.68   | 0.64    | 0.85   | 0.49   | 0.00   | 0.97     | 1.04     | 1.05     | 1.03      | 1.40    | 1.33     | 1.33    | 0.79     | 1.17     | 1.19     | 0.99   | 1.13    | 0.76     |
| 1.5-v1.2                                                   | 1.57   | 1.51   | 1.58    | 1.37   | 1.51   | 1.43   | 0.00     | 0.24     | 0.28     | 0.81      | 1.16    | 0.75     | 0.73    | 1.46     | 1.39     | 1.38     | 1.45   | 1.16    | 1.55     |
| 1.5-v1.4                                                   | 1.05   | 1.05   | 1.06    | 0.98   | 1.00   | 1.02   | 0.16     | 0.00     | 0.14     | 0.42      | 0.84    | 0.60     | 0.59    | 1.00     | 1.01     | 1.00     | 1.01   | 0.79    | 1.00     |
| 1.5-Base                                                   | 1.00   | 1.00   | 1.00    | 0.99   | 1.00   | 0.98   | 0.18     | 0.14     | 0.00     | 0.42      | 0.83    | 0.59     | 0.59    | 1.00     | 1.00     | 1.00     | 1.00   | 0.78    | 1.00     |
| 1.5-Dream                                                  | 0.82   | 0.84   | 0.90    | 1.11   | 0.88   | 0.88   | 0.47     | 0.36     | 0.38     | 0.00      | 0.94    | 0.83     | 0.84    | 0.81     | 1.10     | 1.13     | 1.13   | 0.92    | 0.98     |
| 2.1-DPO                                                    | 0.60   | 0.53   | 0.58    | 0.75   | 0.81   | 0.79   | 0.44     | 0.48     | 0.49     | 0.62      | 0.00    | 0.24     | 0.23    | 0.50     | 0.53     | 0.53     | 0.76   | 0.63    | 0.73     |
| 2.1-Base                                                   | 0.80   | 0.70   | 0.76    | 0.79   | 0.98   | 1.00   | 0.38     | 0.46     | 0.47     | 0.73      | 0.32    | 0.00     | 0.01    | 0.65     | 0.58     | 0.57     | 0.84   | 0.66    | 0.86     |
| 2.1-Art                                                    | 0.81   | 0.71   | 0.77    | 0.80   | 0.99   | 1.02   | 0.38     | 0.46     | 0.48     | 0.75      | 0.32    | 0.01     | 0.00    | 0.65     | 0.58     | 0.57     | 0.85   | 0.67    | 0.87     |
| SD3-Real                                                   | 0.41   | 0.30   | 0.50    | 1.12   | 0.90   | 0.75   | 0.94     | 0.96     | 1.01     | 0.90      | 0.84    | 0.82     | 0.81    | 0.00     | 0.36     | 0.38     | 0.84   | 0.87    | 0.72     |
| SD3-Base                                                   | 0.59   | 0.43   | 0.67    | 1.00   | 0.96   | 0.91   | 0.73     | 0.79     | 0.83     | 1.00      | 0.73    | 0.59     | 0.59    | 0.29     | 0.00     | 0.00     | 0.77   | 0.76    | 0.72     |
| SD3-Anim                                                   | 0.60   | 0.44   | 0.68    | 0.97   | 0.96   | 0.91   | 0.72     | 0.78     | 0.82     | 1.01      | 0.72    | 0.58     | 0.58    | 0.31     | 0.00     | 0.00     | 0.77   | 0.76    | 0.72     |
| XL-DPO                                                     | 0.57   | 0.62   | 0.53    | 0.67   | 0.62   | 0.61   | 0.60     | 0.63     | 0.65     | 0.81      | 0.83    | 0.69     | 0.69    | 0.54     | 0.61     | 0.62     | 0.00   | 0.28    | 0.31     |
| XL-Base                                                    | 0.67   | 0.68   | 0.61    | 0.69   | 0.68   | 0.71   | 0.50     | 0.50     | 0.52     | 0.68      | 0.70    | 0.55     | 0.56    | 0.57     | 0.62     | 0.62     | 0.28   | 0.00    | 0.39     |
| XL-Light                                                   | 0.47   | 0.55   | 0.43    | 0.62   | 0.53   | 0.50   | 0.69     | 0.66     | 0.69     | 0.75      | 0.84    | 0.75     | 0.74    | 0.50     | 0.60     | 0.61     | 0.33   | 0.41    | 0.00     |

Table A29. Normalized Wasserstein Distance Matrix. Each column normalized by max distance to base models. ■ Short, ■ Medium-low, ■ Medium-high, ■ Long distance.

| Prompt: A Photo Of A Sweet Baked Good On A Dark Wood Surface |        |        |         |        |        |        |          |          |          |           |         |          |         |          |          |          |        |         |          |
|--------------------------------------------------------------|--------|--------|---------|--------|--------|--------|----------|----------|----------|-----------|---------|----------|---------|----------|----------|----------|--------|---------|----------|
|                                                              | Flux   |        |         | Kand   |        |        | SD1.5    |          |          |           | SD2.1   |          |         | SD3      |          |          | SDXL   |         |          |
|                                                              | F-Base | F-LoRA | F-Turbo | K-Base | K-Naru | K-Poke | 1.5-v1.2 | 1.5-v1.4 | 1.5-Base | 1.5-Dream | 2.1-DPO | 2.1-Base | 2.1-Art | SD3-Real | SD3-Base | SD3-Anim | XL-DPO | XL-Base | XL-Light |
| F-Base                                                       | 0.00   | 0.13   | 0.12    | 1.00   | 1.00   | 1.00   | 1.00     | 1.00     | 0.77     | 0.24      | 0.60    | 0.67     | 0.67    | 0.27     | 0.47     | 0.46     | 1.00   | 1.00    | 1.00     |
| F-LoRA                                                       | 0.11   | 0.00   | 0.14    | 0.85   | 0.85   | 0.82   | 0.82     | 0.77     | 0.63     | 0.26      | 0.50    | 0.56     | 0.55    | 0.30     | 0.37     | 0.36     | 0.85   | 0.84    | 0.83     |
| F-Turbo                                                      | 0.10   | 0.14   | 0.00    | 0.77   | 0.78   | 0.76   | 0.79     | 0.74     | 0.62     | 0.25      | 0.45    | 0.52     | 0.52    | 0.32     | 0.42     | 0.41     | 0.83   | 0.83    | 0.80     |
| K-Base                                                       | 0.52   | 0.52   | 0.48    | 0.00   | 0.11   | 0.28   | 0.43     | 0.65     | 0.73     | 0.61      | 0.64    | 0.62     | 0.63    | 0.61     | 0.49     | 0.48     | 0.33   | 0.34    | 0.31     |
| K-Naru                                                       | 0.55   | 0.55   | 0.51    | 0.12   | 0.00   | 0.30   | 0.43     | 0.67     | 0.77     | 0.58      | 0.69    | 0.66     | 0.67    | 0.59     | 0.50     | 0.50     | 0.30   | 0.30    | 0.27     |
| K-Poke                                                       | 0.55   | 0.54   | 0.50    | 0.29   | 0.31   | 0.00   | 0.66     | 0.90     | 0.95     | 0.63      | 0.91    | 0.89     | 0.90    | 0.57     | 0.63     | 0.61     | 0.47   | 0.48    | 0.43     |
| 1.5-v1.2                                                     | 0.67   | 0.65   | 0.64    | 0.56   | 0.53   | 0.80   | 0.00     | 0.39     | 0.52     | 0.69      | 0.55    | 0.52     | 0.53    | 0.81     | 0.61     | 0.61     | 0.20   | 0.19    | 0.20     |
| 1.5-v1.4                                                     | 0.40   | 0.36   | 0.36    | 0.50   | 0.49   | 0.65   | 0.23     | 0.00     | 0.27     | 0.38      | 0.32    | 0.33     | 0.33    | 0.56     | 0.38     | 0.38     | 0.33   | 0.33    | 0.31     |
| 1.5-Base                                                     | 0.35   | 0.33   | 0.33    | 0.63   | 0.63   | 0.77   | 0.35     | 0.30     | 0.00     | 0.33      | 0.27    | 0.28     | 0.28    | 0.51     | 0.38     | 0.39     | 0.45   | 0.45    | 0.42     |
| 1.5-Dream                                                    | 0.20   | 0.26   | 0.25    | 0.98   | 0.90   | 0.95   | 0.86     | 0.80     | 0.63     | 0.00      | 0.54    | 0.63     | 0.62    | 0.26     | 0.44     | 0.44     | 0.84   | 0.84    | 0.83     |
| 2.1-DPO                                                      | 0.30   | 0.30   | 0.27    | 0.61   | 0.63   | 0.81   | 0.40     | 0.39     | 0.30     | 0.32      | 0.00    | 0.17     | 0.16    | 0.51     | 0.36     | 0.36     | 0.51   | 0.50    | 0.47     |
| 2.1-Base                                                     | 0.33   | 0.32   | 0.31    | 0.58   | 0.59   | 0.78   | 0.38     | 0.40     | 0.30     | 0.36      | 0.16    | 0.00     | 0.02    | 0.54     | 0.35     | 0.35     | 0.50   | 0.49    | 0.46     |
| 2.1-Art                                                      | 0.32   | 0.32   | 0.31    | 0.59   | 0.59   | 0.79   | 0.38     | 0.41     | 0.30     | 0.36      | 0.16    | 0.02     | 0.00    | 0.55     | 0.36     | 0.35     | 0.50   | 0.49    | 0.46     |
| SD3-Real                                                     | 0.45   | 0.60   | 0.64    | 1.98   | 1.81   | 1.72   | 2.02     | 2.35     | 1.93     | 0.52      | 1.73    | 1.89     | 1.89    | 0.00     | 1.11     | 1.08     | 1.71   | 1.68    | 1.81     |
| SD3-Base                                                     | 0.28   | 0.26   | 0.30    | 0.57   | 0.55   | 0.68   | 0.55     | 0.57     | 0.52     | 0.32      | 0.44    | 0.44     | 0.44    | 0.40     | 0.00     | 0.00     | 0.61   | 0.60    | 0.58     |
| SD3-Anim                                                     | 0.28   | 0.26   | 0.30    | 0.57   | 0.56   | 0.68   | 0.56     | 0.58     | 0.53     | 0.32      | 0.44    | 0.44     | 0.45    | 0.39     | 0.00     | 0.00     | 0.62   | 0.61    | 0.59     |
| XL-DPO                                                       | 0.90   | 0.90   | 0.90    | 0.57   | 0.49   | 0.77   | 0.26     | 0.75     | 0.91     | 0.90      | 0.93    | 0.92     | 0.92    | 0.91     | 0.91     | 0.91     | 0.00   | 0.04    | 0.12     |
| XL-Base                                                      | 1.00   | 1.00   | 1.00    | 0.65   | 0.55   | 0.86   | 0.28     | 0.83     | 1.00     | 1.00      | 1.00    | 1.00     | 1.00    | 1.00     | 1.00     | 1.00     | 0.05   | 0.00    | 0.14     |
| XL-Light                                                     | 0.78   | 0.77   | 0.75    | 0.46   | 0.39   | 0.61   | 0.23     | 0.60     | 0.73     | 0.78      | 0.74    | 0.74     | 0.75    | 0.84     | 0.76     | 0.76     | 0.10   | 0.11    | 0.00     |

Table A30. Normalized Wasserstein Distance Matrix. Each column normalized by max distance to base models. ■ Short, ■ Medium-low, ■ Medium-high, ■ Long distance.

| Prompt: A Photo Of A Sweet Baked Good On A Dimmed Studio |        |        |         |        |        |        |          |          |          |           |         |          |         |          |          |          |        |         |          |
|----------------------------------------------------------|--------|--------|---------|--------|--------|--------|----------|----------|----------|-----------|---------|----------|---------|----------|----------|----------|--------|---------|----------|
|                                                          | Flux   |        |         | Kand   |        |        | SD1.5    |          |          |           | SD2.1   |          |         | SD3      |          |          | SDXL   |         |          |
|                                                          | F-Base | F-LoRA | F-Turbo | K-Base | K-Naru | K-Poke | 1.5-v1.2 | 1.5-v1.4 | 1.5-Base | 1.5-Dream | 2.1-DPO | 2.1-Base | 2.1-Art | SD3-Real | SD3-Base | SD3-Anim | XL-DPO | XL-Base | XL-Light |
| F-Base                                                   | 0.00   | 0.16   | 0.14    | 0.77   | 0.76   | 0.68   | 1.00     | 1.00     | 0.55     | 0.38      | 0.27    | 0.42     | 0.41    | 0.14     | 0.23     | 0.23     | 0.99   | 1.00    | 0.96     |
| F-LoRA                                                   | 0.13   | 0.00   | 0.15    | 0.70   | 0.72   | 0.69   | 0.67     | 0.65     | 0.35     | 0.33      | 0.30    | 0.32     | 0.32    | 0.19     | 0.22     | 0.22     | 0.77   | 0.77    | 0.74     |
| F-Turbo                                                  | 0.10   | 0.14   | 0.00    | 0.59   | 0.61   | 0.55   | 0.72     | 0.69     | 0.39     | 0.30      | 0.23    | 0.31     | 0.30    | 0.19     | 0.26     | 0.25     | 0.74   | 0.75    | 0.70     |
| K-Base                                                   | 0.45   | 0.53   | 0.46    | 0.00   | 0.10   | 0.23   | 0.56     | 0.75     | 0.61     | 0.49      | 0.47    | 0.55     | 0.53    | 0.50     | 0.59     | 0.58     | 0.35   | 0.36    | 0.34     |
| K-Naru                                                   | 0.47   | 0.57   | 0.49    | 0.10   | 0.00   | 0.26   | 0.64     | 0.83     | 0.66     | 0.49      | 0.45    | 0.56     | 0.54    | 0.50     | 0.61     | 0.61     | 0.37   | 0.39    | 0.38     |
| K-Poke                                                   | 0.36   | 0.47   | 0.38    | 0.21   | 0.23   | 0.00   | 0.73     | 0.86     | 0.64     | 0.45      | 0.39    | 0.53     | 0.51    | 0.41     | 0.52     | 0.52     | 0.47   | 0.49    | 0.47     |
| 1.5-v1.2                                                 | 0.57   | 0.50   | 0.55    | 0.55   | 0.60   | 0.79   | 0.00     | 0.33     | 0.41     | 0.60      | 0.62    | 0.51     | 0.51    | 0.57     | 0.46     | 0.46     | 0.28   | 0.27    | 0.26     |
| 1.5-v1.4                                                 | 0.38   | 0.32   | 0.35    | 0.49   | 0.52   | 0.62   | 0.22     | 0.00     | 0.22     | 0.35      | 0.37    | 0.31     | 0.31    | 0.39     | 0.36     | 0.36     | 0.34   | 0.34    | 0.30     |
| 1.5-Base                                                 | 0.27   | 0.22   | 0.25    | 0.50   | 0.52   | 0.60   | 0.35     | 0.28     | 0.00     | 0.27      | 0.26    | 0.22     | 0.22    | 0.26     | 0.26     | 0.26     | 0.48   | 0.49    | 0.44     |
| 1.5-Dream                                                | 0.22   | 0.26   | 0.23    | 0.50   | 0.48   | 0.51   | 0.63     | 0.55     | 0.32     | 0.00      | 0.21    | 0.27     | 0.27    | 0.23     | 0.33     | 0.33     | 0.58   | 0.59    | 0.57     |
| 2.1-DPO                                                  | 0.18   | 0.26   | 0.21    | 0.53   | 0.49   | 0.50   | 0.72     | 0.65     | 0.35     | 0.23      | 0.00    | 0.18     | 0.18    | 0.21     | 0.32     | 0.32     | 0.65   | 0.66    | 0.60     |
| 2.1-Base                                                 | 0.23   | 0.23   | 0.23    | 0.51   | 0.50   | 0.55   | 0.49     | 0.45     | 0.24     | 0.25      | 0.15    | 0.00     | 0.01    | 0.23     | 0.28     | 0.28     | 0.54   | 0.55    | 0.50     |
| 2.1-Art                                                  | 0.23   | 0.23   | 0.22    | 0.50   | 0.49   | 0.54   | 0.50     | 0.46     | 0.24     | 0.25      | 0.15    | 0.01     | 0.00    | 0.23     | 0.28     | 0.28     | 0.55   | 0.55    | 0.50     |
| SD3-Real                                                 | 0.16   | 0.28   | 0.29    | 0.98   | 0.94   | 0.90   | 1.14     | 1.18     | 0.60     | 0.44      | 0.36    | 0.49     | 0.47    | 0.00     | 0.16     | 0.16     | 1.13   | 1.14    | 1.14     |
| SD3-Base                                                 | 0.23   | 0.29   | 0.34    | 1.00   | 1.00   | 1.00   | 0.81     | 0.96     | 0.53     | 0.56      | 0.49    | 0.51     | 0.51    | 0.14     | 0.00     | 0.00     | 1.00   | 1.00    | 1.00     |
| SD3-Anim                                                 | 0.23   | 0.29   | 0.34    | 0.99   | 0.99   | 0.99   | 0.81     | 0.95     | 0.52     | 0.56      | 0.49    | 0.51     | 0.50    | 0.14     | 0.00     | 0.00     | 1.00   | 1.00    | 1.00     |
| XL-DPO                                                   | 0.96   | 0.96   | 0.95    | 0.57   | 0.58   | 0.87   | 0.48     | 0.86     | 0.96     | 0.95      | 0.95    | 0.96     | 0.96    | 0.96     | 0.97     | 0.97     | 0.00   | 0.04    | 0.12     |
| XL-Base                                                  | 1.00   | 1.00   | 1.00    | 0.61   | 0.64   | 0.93   | 0.48     | 0.89     | 1.00     | 1.00      | 1.00    | 1.00     | 1.00    | 1.00     | 1.00     | 1.00     | 0.04   | 0.00    | 0.13     |
| XL-Light                                                 | 0.78   | 0.78   | 0.76    | 0.48   | 0.51   | 0.73   | 0.37     | 0.65     | 0.74     | 0.78      | 0.75    | 0.74     | 0.74    | 0.81     | 0.81     | 0.81     | 0.10   | 0.10    | 0.00     |

Table A31. Normalized Wasserstein Distance Matrix. Each column normalized by max distance to base models. ■ Short, ■ Medium-low, ■ Medium-high, ■ Long distance.

| Prompt: A Photo Of A Sweet Single Fruit On A Dimmed Studio |        |        |         |        |        |        |          |          |          |           |         |          |         |          |          |          |        |         |          |
|------------------------------------------------------------|--------|--------|---------|--------|--------|--------|----------|----------|----------|-----------|---------|----------|---------|----------|----------|----------|--------|---------|----------|
|                                                            | Flux   |        |         | Kand   |        |        | SD1.5    |          |          |           | SD2.1   |          |         | SD3      |          |          | SDXL   |         |          |
|                                                            | F-Base | F-LoRA | F-Turbo | K-Base | K-Naru | K-Poke | 1.5-v1.2 | 1.5-v1.4 | 1.5-Base | 1.5-Dream | 2.1-DPO | 2.1-Base | 2.1-Art | SD3-Real | SD3-Base | SD3-Anim | XL-DPO | XL-Base | XL-Light |
| F-Base                                                     | 0.00   | 0.31   | 0.33    | 0.27   | 0.24   | 0.26   | 0.80     | 0.97     | 0.94     | 0.61      | 0.96    | 1.00     | 1.00    | 0.58     | 0.54     | 0.54     | 0.82   | 0.97    | 0.80     |
| F-LoRA                                                     | 0.29   | 0.00   | 0.42    | 0.44   | 0.39   | 0.38   | 0.84     | 0.88     | 0.95     | 0.73      | 0.75    | 0.77     | 0.77    | 0.59     | 0.63     | 0.65     | 0.75   | 0.84    | 0.77     |
| F-Turbo                                                    | 0.35   | 0.47   | 0.00    | 0.60   | 0.57   | 0.57   | 0.64     | 0.93     | 0.88     | 0.57      | 1.03    | 1.06     | 1.06    | 0.88     | 0.76     | 0.75     | 0.89   | 1.04    | 0.82     |
| K-Base                                                     | 0.25   | 0.43   | 0.52    | 0.00   | 0.08   | 0.17   | 0.92     | 0.96     | 0.93     | 0.66      | 0.78    | 0.85     | 0.85    | 0.42     | 0.46     | 0.46     | 0.78   | 0.91    | 0.82     |
| K-Naru                                                     | 0.25   | 0.43   | 0.56    | 0.09   | 0.00   | 0.16   | 0.99     | 1.04     | 1.05     | 0.72      | 0.78    | 0.85     | 0.85    | 0.41     | 0.48     | 0.48     | 0.81   | 0.96    | 0.90     |
| K-Poke                                                     | 0.30   | 0.46   | 0.63    | 0.22   | 0.18   | 0.00   | 1.11     | 1.12     | 1.18     | 0.84      | 0.79    | 0.87     | 0.88    | 0.34     | 0.38     | 0.38     | 0.83   | 0.94    | 0.89     |
| 1.5-v1.2                                                   | 1.07   | 1.19   | 0.80    | 1.33   | 1.27   | 1.27   | 0.00     | 0.80     | 0.73     | 0.65      | 1.38    | 1.34     | 1.33    | 1.44     | 1.40     | 1.39     | 1.31   | 1.38    | 1.31     |
| 1.5-v1.4                                                   | 0.95   | 0.91   | 0.86    | 1.02   | 0.97   | 0.94   | 0.59     | 0.00     | 0.51     | 0.67      | 0.87    | 0.89     | 0.88    | 0.96     | 1.04     | 1.05     | 0.94   | 0.98    | 0.97     |
| 1.5-Base                                                   | 0.93   | 1.00   | 0.82    | 1.00   | 1.00   | 1.00   | 0.54     | 0.51     | 0.00     | 0.60      | 1.00    | 0.99     | 1.00    | 1.00     | 1.00     | 1.00     | 1.00   | 1.00    | 1.00     |
| 1.5-Dream                                                  | 0.66   | 0.85   | 0.59    | 0.78   | 0.76   | 0.79   | 0.54     | 0.75     | 0.66     | 0.00      | 1.10    | 1.09     | 1.11    | 0.90     | 0.79     | 0.77     | 0.90   | 1.02    | 0.91     |
| 2.1-DPO                                                    | 1.08   | 0.89   | 1.09    | 0.95   | 0.84   | 0.77   | 1.16     | 1.00     | 1.13     | 1.13      | 0.00    | 0.30     | 0.29    | 0.53     | 0.73     | 0.77     | 0.66   | 0.68    | 0.96     |
| 2.1-Base                                                   | 1.00   | 0.82   | 1.00    | 0.91   | 0.81   | 0.75   | 1.00     | 0.91     | 1.00     | 1.00      | 0.27    | 0.00     | 0.02    | 0.53     | 0.70     | 0.74     | 0.61   | 0.65    | 0.90     |
| 2.1-Art                                                    | 1.00   | 0.81   | 1.00    | 0.92   | 0.82   | 0.75   | 0.99     | 0.90     | 1.01     | 1.01      | 0.26    | 0.02     | 0.00    | 0.53     | 0.69     | 0.74     | 0.60   | 0.66    | 0.90     |
| SD3-Real                                                   | 0.60   | 0.64   | 0.85    | 0.47   | 0.41   | 0.30   | 1.11     | 1.01     | 1.04     | 0.84      | 0.49    | 0.55     | 0.55    | 0.00     | 0.17     | 0.19     | 0.54   | 0.64    | 0.81     |
| SD3-Base                                                   | 0.51   | 0.63   | 0.67    | 0.47   | 0.43   | 0.31   | 0.99     | 1.00     | 0.95     | 0.68      | 0.61    | 0.66     | 0.66    | 0.16     | 0.00     | 0.01     | 0.49   | 0.60    | 0.77     |
| SD3-Anim                                                   | 0.50   | 0.65   | 0.66    | 0.47   | 0.43   | 0.31   | 0.98     | 1.01     | 0.95     | 0.66      | 0.64    | 0.69     | 0.69    | 0.17     | 0.01     | 0.00     | 0.50   | 0.63    | 0.77     |
| XL-DPO                                                     | 0.63   | 0.61   | 0.64    | 0.64   | 0.60   | 0.54   | 0.75     | 0.74     | 0.77     | 0.63      | 0.45    | 0.47     | 0.46    | 0.40     | 0.39     | 0.41     | 0.00   | 0.37    | 0.59     |
| XL-Base                                                    | 0.75   | 0.68   | 0.76    | 0.76   | 0.71   | 0.62   | 0.80     | 0.77     | 0.78     | 0.72      | 0.47    | 0.50     | 0.51    | 0.48     | 0.49     | 0.51     | 0.38   | 0.00    | 0.64     |
| XL-Light                                                   | 0.56   | 0.57   | 0.54    | 0.62   | 0.61   | 0.54   | 0.69     | 0.69     | 0.71     | 0.58      | 0.60    | 0.63     | 0.63    | 0.55     | 0.57     | 0.57     | 0.54   | 0.58    | 0.00     |

Table A32. Normalized Wasserstein Distance Matrix. Each column normalized by max distance to base models. ■ Short, ■ Medium-low, ■ Medium-high, ■ Long distance.

| Prompt: A Photo Of A Sweet Single Fruit On A Dish |        |        |         |        |        |        |          |          |          |           |         |          |         |          |          |          |        |         |          |
|---------------------------------------------------|--------|--------|---------|--------|--------|--------|----------|----------|----------|-----------|---------|----------|---------|----------|----------|----------|--------|---------|----------|
|                                                   | Flux   |        |         | Kand   |        |        | SD1.5    |          |          |           | SD2.1   |          |         | SD3      |          |          | SDXL   |         |          |
|                                                   | F-Base | F-LoRA | F-Turbo | K-Base | K-Naru | K-Poke | 1.5-v1.2 | 1.5-v1.4 | 1.5-Base | 1.5-Dream | 2.1-DPO | 2.1-Base | 2.1-Art | SD3-Real | SD3-Base | SD3-Anim | XL-DPO | XL-Base | XL-Light |
| F-Base                                            | 0.00   | 0.26   | 0.49    | 0.33   | 0.33   | 0.37   | 0.96     | 0.97     | 0.94     | 0.98      | 0.65    | 0.78     | 0.77    | 0.43     | 0.49     | 0.50     | 0.51   | 0.52    | 0.56     |
| F-LoRA                                            | 0.27   | 0.00   | 0.62    | 0.43   | 0.43   | 0.40   | 0.96     | 0.97     | 0.98     | 1.03      | 0.62    | 0.75     | 0.74    | 0.46     | 0.57     | 0.57     | 0.48   | 0.51    | 0.63     |
| F-Turbo                                           | 0.37   | 0.46   | 0.00    | 0.56   | 0.55   | 0.59   | 0.73     | 0.76     | 0.72     | 0.74      | 0.68    | 0.77     | 0.78    | 0.62     | 0.59     | 0.60     | 0.70   | 0.70    | 0.67     |
| K-Base                                            | 0.35   | 0.44   | 0.78    | 0.00   | 0.12   | 0.18   | 1.00     | 1.00     | 1.00     | 1.00      | 0.47    | 0.66     | 0.65    | 0.27     | 0.39     | 0.39     | 0.31   | 0.36    | 0.38     |
| K-Naru                                            | 0.37   | 0.47   | 0.81    | 0.13   | 0.00   | 0.24   | 1.03     | 1.04     | 1.05     | 1.06      | 0.51    | 0.67     | 0.66    | 0.32     | 0.45     | 0.45     | 0.36   | 0.42    | 0.41     |
| K-Poke                                            | 0.50   | 0.53   | 1.06    | 0.23   | 0.29   | 0.00   | 1.26     | 1.24     | 1.28     | 1.30      | 0.67    | 0.86     | 0.87    | 0.31     | 0.50     | 0.50     | 0.28   | 0.39    | 0.58     |
| 1.5-v1.2                                          | 1.34   | 1.30   | 1.34    | 1.32   | 1.30   | 1.29   | 0.00     | 0.28     | 0.37     | 0.51      | 1.27    | 1.33     | 1.31    | 1.26     | 1.19     | 1.20     | 1.37   | 1.34    | 1.31     |
| 1.5-v1.4                                          | 1.18   | 1.13   | 1.21    | 1.15   | 1.13   | 1.11   | 0.25     | 0.00     | 0.30     | 0.51      | 1.11    | 1.10     | 1.10    | 1.09     | 1.05     | 1.05     | 1.15   | 1.14    | 1.14     |
| 1.5-Base                                          | 1.00   | 1.00   | 1.00    | 1.00   | 1.00   | 1.00   | 0.28     | 0.26     | 0.00     | 0.45      | 1.00    | 1.00     | 1.00    | 1.00     | 1.00     | 1.00     | 1.00   | 1.00    | 1.00     |
| 1.5-Dream                                         | 0.88   | 0.89   | 0.87    | 0.84   | 0.84   | 0.85   | 0.33     | 0.37     | 0.38     | 0.00      | 0.81    | 0.87     | 0.86    | 0.80     | 0.76     | 0.76     | 0.86   | 0.84    | 0.84     |
| 2.1-DPO                                           | 0.61   | 0.56   | 0.82    | 0.41   | 0.43   | 0.46   | 0.84     | 0.85     | 0.88     | 0.85      | 0.00    | 0.32     | 0.32    | 0.37     | 0.44     | 0.44     | 0.41   | 0.40    | 0.53     |
| 2.1-Base                                          | 0.63   | 0.58   | 0.82    | 0.50   | 0.49   | 0.51   | 0.77     | 0.73     | 0.76     | 0.79      | 0.28    | 0.00     | 0.04    | 0.45     | 0.47     | 0.47     | 0.48   | 0.46    | 0.60     |
| 2.1-Art                                           | 0.61   | 0.57   | 0.81    | 0.48   | 0.47   | 0.50   | 0.74     | 0.71     | 0.74     | 0.76      | 0.28    | 0.04     | 0.00    | 0.43     | 0.45     | 0.45     | 0.46   | 0.44    | 0.56     |
| SD3-Real                                          | 0.52   | 0.53   | 0.98    | 0.31   | 0.34   | 0.27   | 1.08     | 1.07     | 1.13     | 1.07      | 0.48    | 0.67     | 0.65    | 0.00     | 0.29     | 0.29     | 0.34   | 0.34    | 0.49     |
| SD3-Base                                          | 0.48   | 0.55   | 0.77    | 0.36   | 0.40   | 0.37   | 0.84     | 0.85     | 0.93     | 0.84      | 0.46    | 0.58     | 0.57    | 0.24     | 0.00     | 0.01     | 0.49   | 0.44    | 0.52     |
| SD3-Anim                                          | 0.49   | 0.54   | 0.77    | 0.36   | 0.40   | 0.36   | 0.84     | 0.85     | 0.93     | 0.84      | 0.46    | 0.57     | 0.56    | 0.23     | 0.01     | 0.00     | 0.49   | 0.44    | 0.52     |
| XL-DPO                                            | 0.55   | 0.50   | 0.99    | 0.31   | 0.35   | 0.23   | 1.06     | 1.02     | 1.02     | 1.04      | 0.48    | 0.64     | 0.64    | 0.31     | 0.54     | 0.53     | 0.00   | 0.16    | 0.49     |
| XL-Base                                           | 0.52   | 0.49   | 0.91    | 0.33   | 0.38   | 0.28   | 0.95     | 0.93     | 0.94     | 0.93      | 0.43    | 0.56     | 0.55    | 0.28     | 0.45     | 0.45     | 0.14   | 0.00    | 0.45     |
| XL-Light                                          | 0.44   | 0.47   | 0.69    | 0.28   | 0.29   | 0.34   | 0.74     | 0.74     | 0.74     | 0.74      | 0.44    | 0.58     | 0.56    | 0.32     | 0.41     | 0.41     | 0.35   | 0.36    | 0.00     |

Table A33. Normalized Wasserstein Distance Matrix. Each column normalized by max distance to base models. ■ Short, ■ Medium-low, ■ Medium-high, ■ Long distance.

| Prompt: A Photo Of A Sweet Single Fruit On A Wooden Floor |        |        |         |        |        |        |          |          |          |           |         |          |         |          |          |          |        |         |          |
|-----------------------------------------------------------|--------|--------|---------|--------|--------|--------|----------|----------|----------|-----------|---------|----------|---------|----------|----------|----------|--------|---------|----------|
|                                                           | Flux   |        |         | Kand   |        |        | SD1.5    |          |          |           | SD2.1   |          |         | SD3      |          |          | SDXL   |         |          |
|                                                           | F-Base | F-LoRA | F-Turbo | K-Base | K-Naru | K-Poke | 1.5-v1.2 | 1.5-v1.4 | 1.5-Base | 1.5-Dream | 2.1-DPO | 2.1-Base | 2.1-Art | SD3-Real | SD3-Base | SD3-Anim | XL-DPO | XL-Base | XL-Light |
| F-Base                                                    | 0.00   | 0.17   | 0.35    | 0.34   | 0.33   | 0.36   | 0.71     | 0.77     | 0.74     | 0.88      | 0.87    | 0.84     | 0.84    | 0.43     | 0.34     | 0.34     | 0.45   | 0.51    | 0.37     |
| F-LoRA                                                    | 0.21   | 0.00   | 0.50    | 0.36   | 0.34   | 0.43   | 0.86     | 0.93     | 0.94     | 1.14      | 1.03    | 0.97     | 0.98    | 0.33     | 0.37     | 0.36     | 0.62   | 0.67    | 0.40     |
| F-Turbo                                                   | 0.30   | 0.34   | 0.00    | 0.63   | 0.60   | 0.62   | 0.55     | 0.63     | 0.62     | 1.00      | 0.88    | 0.81     | 0.82    | 0.55     | 0.52     | 0.52     | 0.55   | 0.62    | 0.47     |
| K-Base                                                    | 0.46   | 0.39   | 1.00    | 0.00   | 0.06   | 0.15   | 1.00     | 1.00     | 1.00     | 1.00      | 1.00    | 1.00     | 1.00    | 0.33     | 0.42     | 0.41     | 0.62   | 0.70    | 0.43     |
| K-Naru                                                    | 0.49   | 0.39   | 1.04    | 0.06   | 0.00   | 0.16   | 1.07     | 1.09     | 1.09     | 1.11      | 1.12    | 1.11     | 1.11    | 0.31     | 0.44     | 0.43     | 0.65   | 0.73    | 0.42     |
| K-Poke                                                    | 0.50   | 0.47   | 1.01    | 0.15   | 0.15   | 0.00   | 1.00     | 1.06     | 1.03     | 0.96      | 1.14    | 1.13     | 1.13    | 0.37     | 0.41     | 0.41     | 0.52   | 0.61    | 0.39     |
| 1.5-v1.2                                                  | 1.24   | 1.19   | 1.13    | 1.29   | 1.27   | 1.25   | 0.00     | 0.39     | 0.32     | 1.26      | 0.94    | 0.69     | 0.69    | 1.20     | 1.29     | 1.28     | 1.30   | 1.31    | 1.25     |
| 1.5-v1.4                                                  | 0.85   | 0.81   | 0.81    | 0.81   | 0.81   | 0.84   | 0.25     | 0.00     | 0.26     | 0.84      | 0.62    | 0.49     | 0.49    | 0.85     | 0.88     | 0.88     | 0.82   | 0.82    | 0.82     |
| 1.5-Base                                                  | 1.00   | 1.00   | 0.98    | 1.00   | 1.00   | 1.00   | 0.25     | 0.32     | 0.00     | 0.97      | 0.60    | 0.49     | 0.48    | 1.00     | 1.00     | 1.00     | 1.00   | 1.00    | 1.00     |
| 1.5-Dream                                                 | 0.60   | 0.61   | 0.80    | 0.50   | 0.51   | 0.47   | 0.49     | 0.52     | 0.49     | 0.00      | 0.59    | 0.56     | 0.56    | 0.59     | 0.46     | 0.46     | 0.55   | 0.55    | 0.65     |
| 2.1-DPO                                                   | 0.74   | 0.69   | 0.87    | 0.63   | 0.65   | 0.69   | 0.46     | 0.48     | 0.38     | 0.73      | 0.00    | 0.19     | 0.20    | 0.65     | 0.61     | 0.61     | 0.73   | 0.71    | 0.78     |
| 2.1-Base                                                  | 0.86   | 0.78   | 0.96    | 0.75   | 0.77   | 0.83   | 0.40     | 0.46     | 0.37     | 0.84      | 0.23    | 0.00     | 0.01    | 0.75     | 0.73     | 0.73     | 0.83   | 0.81    | 0.89     |
| 2.1-Art                                                   | 0.86   | 0.78   | 0.97    | 0.75   | 0.77   | 0.83   | 0.40     | 0.45     | 0.36     | 0.83      | 0.24    | 0.01     | 0.00    | 0.76     | 0.73     | 0.73     | 0.83   | 0.81    | 0.89     |
| SD3-Real                                                  | 1.07   | 0.65   | 1.61    | 0.60   | 0.52   | 0.66   | 1.71     | 1.93     | 1.84     | 2.15      | 1.91    | 1.83     | 1.86    | 0.00     | 0.61     | 0.60     | 1.32   | 1.42    | 0.83     |
| SD3-Base                                                  | 0.38   | 0.32   | 0.68    | 0.35   | 0.33   | 0.33   | 0.82     | 0.89     | 0.82     | 0.74      | 0.79    | 0.80     | 0.80    | 0.27     | 0.00     | 0.00     | 0.38   | 0.39    | 0.40     |
| SD3-Anim                                                  | 0.38   | 0.32   | 0.67    | 0.34   | 0.33   | 0.33   | 0.82     | 0.89     | 0.82     | 0.74      | 0.79    | 0.80     | 0.81    | 0.27     | 0.00     | 0.00     | 0.38   | 0.39    | 0.39     |
| XL-DPO                                                    | 0.37   | 0.41   | 0.54    | 0.39   | 0.37   | 0.31   | 0.62     | 0.62     | 0.62     | 0.67      | 0.72    | 0.68     | 0.68    | 0.44     | 0.29     | 0.28     | 0.00   | 0.13    | 0.28     |
| XL-Base                                                   | 0.39   | 0.41   | 0.56    | 0.40   | 0.39   | 0.34   | 0.58     | 0.58     | 0.57     | 0.62      | 0.65    | 0.62     | 0.62    | 0.44     | 0.27     | 0.27     | 0.12   | 0.00    | 0.30     |
| XL-Light                                                  | 0.41   | 0.35   | 0.61    | 0.35   | 0.31   | 0.31   | 0.79     | 0.82     | 0.81     | 1.05      | 1.01    | 0.96     | 0.96    | 0.37     | 0.39     | 0.38     | 0.36   | 0.42    | 0.00     |

Table A34. Normalized Wasserstein Distance Matrix. Each column normalized by max distance to base models. ■ Short, ■ Medium-low, ■ Medium-high, ■ Long distance.

| Prompt: A Photo Of A Tropical Single Flower In A Dimmed Studio |        |        |         |        |        |        |          |          |          |           |         |          |         |          |          |          |        |         |          |
|----------------------------------------------------------------|--------|--------|---------|--------|--------|--------|----------|----------|----------|-----------|---------|----------|---------|----------|----------|----------|--------|---------|----------|
|                                                                | Flux   |        |         | Kand   |        |        | SD1.5    |          |          |           | SD2.1   |          |         | SD3      |          |          | SDXL   |         |          |
|                                                                | F-Base | F-LoRA | F-Turbo | K-Base | K-Naru | K-Poke | 1.5-v1.2 | 1.5-v1.4 | 1.5-Base | 1.5-Dream | 2.1-DPO | 2.1-Base | 2.1-Art | SD3-Real | SD3-Base | SD3-Anim | XL-DPO | XL-Base | XL-Light |
| F-Base                                                         | 0.00   | 0.39   | 0.11    | 0.53   | 0.63   | 0.49   | 0.69     | 1.00     | 0.92     | 0.56      | 1.00    | 1.00     | 1.00    | 1.00     | 0.70     | 0.73     | 0.64   | 0.73    | 0.58     |
| F-LoRA                                                         | 0.28   | 0.00   | 0.28    | 0.59   | 0.62   | 0.62   | 0.91     | 1.14     | 1.00     | 0.79      | 0.72    | 0.71     | 0.71    | 0.67     | 0.74     | 0.76     | 0.65   | 0.68    | 0.62     |
| F-Turbo                                                        | 0.11   | 0.38   | 0.00    | 0.57   | 0.66   | 0.52   | 0.70     | 1.00     | 0.91     | 0.57      | 0.96    | 0.96     | 0.96    | 0.93     | 0.72     | 0.75     | 0.61   | 0.67    | 0.57     |
| K-Base                                                         | 0.39   | 0.61   | 0.43    | 0.00   | 0.15   | 0.25   | 0.56     | 0.80     | 0.78     | 0.54      | 0.73    | 0.73     | 0.74    | 0.87     | 0.64     | 0.66     | 0.57   | 0.67    | 0.39     |
| K-Naru                                                         | 0.43   | 0.60   | 0.47    | 0.14   | 0.00   | 0.29   | 0.63     | 0.84     | 0.79     | 0.62      | 0.65    | 0.68     | 0.67    | 0.78     | 0.61     | 0.63     | 0.60   | 0.68    | 0.44     |
| K-Poke                                                         | 0.39   | 0.70   | 0.43    | 0.28   | 0.35   | 0.00   | 0.59     | 0.88     | 0.85     | 0.53      | 0.76    | 0.80     | 0.81    | 0.94     | 0.67     | 0.69     | 0.71   | 0.80    | 0.47     |
| 1.5-v1.2                                                       | 0.73   | 1.34   | 0.76    | 0.81   | 0.97   | 0.77   | 0.00     | 0.55     | 0.68     | 0.37      | 1.06    | 1.05     | 1.05    | 1.55     | 0.96     | 0.99     | 1.04   | 1.09    | 0.68     |
| 1.5-v1.4                                                       | 0.68   | 1.10   | 0.72    | 0.75   | 0.85   | 0.75   | 0.36     | 0.00     | 0.42     | 0.46      | 0.72    | 0.68     | 0.68    | 1.04     | 0.78     | 0.80     | 0.86   | 0.89    | 0.64     |
| 1.5-Base                                                       | 0.57   | 0.88   | 0.59    | 0.66   | 0.72   | 0.65   | 0.40     | 0.38     | 0.00     | 0.49      | 0.65    | 0.62     | 0.62    | 0.86     | 0.66     | 0.68     | 0.69   | 0.73    | 0.53     |
| 1.5-Dream                                                      | 0.81   | 1.59   | 0.85    | 1.06   | 1.32   | 0.94   | 0.51     | 0.95     | 1.14     | 0.00      | 1.50    | 1.43     | 1.44    | 2.07     | 1.32     | 1.37     | 1.15   | 1.23    | 0.78     |
| 2.1-DPO                                                        | 1.04   | 1.06   | 1.05    | 1.04   | 1.00   | 0.99   | 1.06     | 1.10     | 1.10     | 1.09      | 0.00    | 0.18     | 0.19    | 0.70     | 0.98     | 0.98     | 1.16   | 1.15    | 1.10     |
| 2.1-Base                                                       | 1.00   | 1.00   | 1.00    | 1.00   | 1.00   | 1.00   | 1.00     | 1.00     | 1.00     | 1.00      | 0.17    | 0.00     | 0.01    | 0.68     | 1.00     | 1.00     | 1.00   | 1.00    | 1.00     |
| 2.1-Art                                                        | 0.99   | 1.00   | 0.99    | 1.00   | 0.99   | 1.00   | 0.99     | 0.99     | 0.99     | 1.00      | 0.18    | 0.01     | 0.00    | 0.67     | 0.98     | 0.98     | 1.00   | 1.00    | 1.00     |
| SD3-Real                                                       | 0.58   | 0.55   | 0.56    | 0.69   | 0.67   | 0.68   | 0.86     | 0.88     | 0.80     | 0.84      | 0.39    | 0.39     | 0.39    | 0.00     | 0.61     | 0.62     | 0.63   | 0.63    | 0.65     |
| SD3-Base                                                       | 0.43   | 0.64   | 0.46    | 0.54   | 0.55   | 0.52   | 0.56     | 0.70     | 0.66     | 0.57      | 0.58    | 0.61     | 0.61    | 0.65     | 0.00     | 0.00     | 0.61   | 0.64    | 0.56     |
| SD3-Anim                                                       | 0.44   | 0.64   | 0.47    | 0.54   | 0.55   | 0.51   | 0.56     | 0.70     | 0.65     | 0.57      | 0.56    | 0.60     | 0.59    | 0.64     | 0.00     | 0.00     | 0.61   | 0.64    | 0.57     |
| XL-DPO                                                         | 0.44   | 0.62   | 0.43    | 0.54   | 0.61   | 0.61   | 0.68     | 0.86     | 0.77     | 0.55      | 0.76    | 0.68     | 0.69    | 0.75     | 0.67     | 0.70     | 0.00   | 0.13    | 0.31     |
| XL-Base                                                        | 0.48   | 0.64   | 0.47    | 0.60   | 0.66   | 0.67   | 0.69     | 0.86     | 0.78     | 0.57      | 0.73    | 0.66     | 0.67    | 0.73     | 0.69     | 0.72     | 0.13   | 0.00    | 0.32     |
| XL-Light                                                       | 0.50   | 0.76   | 0.52    | 0.47   | 0.57   | 0.51   | 0.56     | 0.81     | 0.75     | 0.47      | 0.92    | 0.87     | 0.88    | 0.98     | 0.80     | 0.83     | 0.39   | 0.43    | 0.00     |

Table A35. Normalized Wasserstein Distance Matrix. Each column normalized by max distance to base models. ■ Short, ■ Medium-low, ■ Medium-high, ■ Long distance.

| Prompt: A Photo Of A Tropical Single Flower On A Pot |        |        |         |        |        |        |          |          |          |           |         |          |         |          |          |          |        |         |          |
|------------------------------------------------------|--------|--------|---------|--------|--------|--------|----------|----------|----------|-----------|---------|----------|---------|----------|----------|----------|--------|---------|----------|
|                                                      | Flux   |        |         | Kand   |        |        | SD1.5    |          |          |           | SD2.1   |          |         | SD3      |          |          | SDXL   |         |          |
|                                                      | F-Base | F-LoRA | F-Turbo | K-Base | K-Naru | K-Poke | 1.5-v1.2 | 1.5-v1.4 | 1.5-Base | 1.5-Dream | 2.1-DPO | 2.1-Base | 2.1-Art | SD3-Real | SD3-Base | SD3-Anim | XL-DPO | XL-Base | XL-Light |
| F-Base                                               | 0.00   | 0.49   | 0.23    | 0.80   | 0.78   | 0.59   | 0.93     | 0.93     | 0.97     | 0.91      | 0.85    | 0.89     | 0.89    | 0.66     | 0.48     | 0.49     | 0.63   | 0.68    | 0.70     |
| F-LoRA                                               | 0.52   | 0.00   | 0.60    | 1.04   | 0.93   | 0.75   | 1.19     | 1.03     | 1.04     | 1.16      | 0.81    | 0.87     | 0.88    | 0.47     | 0.73     | 0.72     | 0.77   | 0.84    | 0.80     |
| F-Turbo                                              | 0.21   | 0.50   | 0.00    | 0.72   | 0.71   | 0.55   | 0.84     | 0.83     | 0.88     | 0.77      | 0.75    | 0.78     | 0.78    | 0.66     | 0.44     | 0.45     | 0.60   | 0.64    | 0.67     |
| K-Base                                               | 0.57   | 0.69   | 0.57    | 0.00   | 0.23   | 0.41   | 0.63     | 0.66     | 0.65     | 0.63      | 0.64    | 0.61     | 0.61    | 0.77     | 0.65     | 0.65     | 0.62   | 0.63    | 0.68     |
| K-Naru                                               | 0.62   | 0.69   | 0.62    | 0.26   | 0.00   | 0.45   | 0.60     | 0.60     | 0.60     | 0.62      | 0.60    | 0.58     | 0.57    | 0.78     | 0.72     | 0.72     | 0.68   | 0.68    | 0.73     |
| K-Poke                                               | 0.56   | 0.66   | 0.57    | 0.55   | 0.54   | 0.00   | 0.90     | 0.90     | 0.85     | 0.82      | 0.82    | 0.86     | 0.85    | 0.63     | 0.49     | 0.49     | 0.42   | 0.46    | 0.52     |
| 1.5-v1.2                                             | 1.19   | 1.41   | 1.17    | 1.13   | 0.95   | 1.22   | 0.00     | 0.44     | 0.52     | 0.50      | 0.86    | 0.71     | 0.73    | 1.49     | 1.15     | 1.17     | 1.11   | 1.09    | 1.18     |
| 1.5-v1.4                                             | 1.04   | 1.07   | 1.02    | 1.04   | 0.83   | 1.06   | 0.39     | 0.00     | 0.36     | 0.52      | 0.65    | 0.54     | 0.55    | 1.08     | 1.01     | 1.01     | 1.02   | 1.01    | 1.07     |
| 1.5-Base                                             | 1.00   | 1.00   | 1.00    | 0.95   | 0.78   | 0.93   | 0.42     | 0.34     | 0.00     | 0.55      | 0.65    | 0.57     | 0.57    | 1.00     | 0.94     | 0.94     | 0.86   | 0.87    | 0.92     |
| 1.5-Dream                                            | 0.95   | 1.12   | 0.88    | 0.91   | 0.81   | 0.90   | 0.41     | 0.48     | 0.55     | 0.00      | 0.76    | 0.64     | 0.65    | 1.20     | 0.94     | 0.96     | 0.91   | 0.92    | 1.03     |
| 2.1-DPO                                              | 0.88   | 0.78   | 0.86    | 0.94   | 0.78   | 0.90   | 0.71     | 0.60     | 0.65     | 0.76      | 0.00    | 0.28     | 0.28    | 0.80     | 0.93     | 0.93     | 0.95   | 0.94    | 0.91     |
| 2.1-Base                                             | 0.98   | 0.90   | 0.95    | 0.94   | 0.80   | 1.00   | 0.62     | 0.53     | 0.61     | 0.68      | 0.30    | 0.00     | 0.01    | 0.91     | 1.00     | 1.00     | 1.00   | 1.00    | 1.00     |
| 2.1-Art                                              | 0.96   | 0.89   | 0.94    | 0.93   | 0.78   | 0.98   | 0.62     | 0.53     | 0.60     | 0.68      | 0.29    | 0.01     | 0.00    | 0.89     | 0.98     | 0.98     | 0.99   | 0.99    | 0.99     |
| SD3-Real                                             | 0.89   | 0.59   | 0.98    | 1.46   | 1.32   | 0.89   | 1.59     | 1.31     | 1.31     | 1.56      | 1.04    | 1.11     | 1.11    | 0.00     | 0.70     | 0.68     | 0.73   | 0.83    | 0.77     |
| SD3-Base                                             | 0.53   | 0.75   | 0.54    | 1.00   | 1.00   | 0.57   | 1.00     | 1.00     | 1.00     | 1.00      | 0.99    | 1.00     | 1.00    | 0.57     | 0.00     | 0.00     | 0.35   | 0.41    | 0.43     |
| SD3-Anim                                             | 0.52   | 0.72   | 0.53    | 0.99   | 0.98   | 0.56   | 0.99     | 0.98     | 0.98     | 0.99      | 0.96    | 0.98     | 0.97    | 0.54     | 0.00     | 0.00     | 0.36   | 0.41    | 0.43     |
| XL-DPO                                               | 0.75   | 0.85   | 0.78    | 1.02   | 1.00   | 0.53   | 1.04     | 1.09     | 0.98     | 1.04      | 1.08    | 1.07     | 1.07    | 0.64     | 0.38     | 0.39     | 0.00   | 0.23    | 0.36     |
| XL-Base                                              | 0.75   | 0.86   | 0.77    | 0.98   | 0.93   | 0.54   | 0.95     | 1.00     | 0.92     | 0.98      | 1.00    | 1.00     | 1.00    | 0.67     | 0.41     | 0.42     | 0.21   | 0.00    | 0.36     |
| XL-Light                                             | 0.79   | 0.84   | 0.83    | 1.08   | 1.04   | 0.63   | 1.05     | 1.08     | 1.01     | 1.13      | 1.00    | 1.03     | 1.03    | 0.64     | 0.44     | 0.45     | 0.34   | 0.37    | 0.00     |

Table A36. Normalized Wasserstein Distance Matrix. Each column normalized by max distance to base models. ■ Short, ■ Medium-low, ■ Medium-high, ■ Long distance.

|           |  | Prompt: A Photo Of A Tropical Single Flower On A Vase |        |         |        |        |        |          |          |          |           |         |          |         |          |          |          |        |         |          |
|-----------|--|-------------------------------------------------------|--------|---------|--------|--------|--------|----------|----------|----------|-----------|---------|----------|---------|----------|----------|----------|--------|---------|----------|
|           |  | Flux                                                  |        |         | Kand   |        |        | SD1.5    |          |          |           | SD2.1   |          |         | SD3      |          |          | SDXL   |         |          |
|           |  | F-Base                                                | F-LoRA | F-Turbo | K-Base | K-Naru | K-Poke | 1.5-v1.2 | 1.5-v1.4 | 1.5-Base | 1.5-Dream | 2.1-DPO | 2.1-Base | 2.1-Art | SD3-Real | SD3-Base | SD3-Anim | XL-DPO | XL-Base | XL-Light |
| F-Base    |  | 0.00                                                  | 0.41   | 0.27    | 0.50   | 0.51   | 0.44   | 0.75     | 0.77     | 0.70     | 0.63      | 0.46    | 0.47     | 0.47    | 0.60     | 0.51     | 0.51     | 0.68   | 0.72    | 0.65     |
| F-LoRA    |  | 0.52                                                  | 0.00   | 0.61    | 0.59   | 0.47   | 0.64   | 1.08     | 1.00     | 0.84     | 0.94      | 0.39    | 0.42     | 0.42    | 0.65     | 0.65     | 0.64     | 0.73   | 0.76    | 0.75     |
| F-Turbo   |  | 0.27                                                  | 0.48   | 0.00    | 0.51   | 0.53   | 0.38   | 0.73     | 0.74     | 0.68     | 0.55      | 0.51    | 0.51     | 0.52    | 0.57     | 0.47     | 0.46     | 0.64   | 0.67    | 0.63     |
| K-Base    |  | 0.49                                                  | 0.46   | 0.50    | 0.00   | 0.22   | 0.32   | 0.82     | 0.79     | 0.64     | 0.77      | 0.41    | 0.42     | 0.42    | 0.52     | 0.51     | 0.50     | 0.50   | 0.52    | 0.60     |
| K-Naru    |  | 0.60                                                  | 0.43   | 0.61    | 0.25   | 0.00   | 0.36   | 0.97     | 0.92     | 0.74     | 0.93      | 0.41    | 0.44     | 0.44    | 0.61     | 0.60     | 0.59     | 0.56   | 0.58    | 0.68     |
| K-Poke    |  | 0.49                                                  | 0.57   | 0.43    | 0.36   | 0.35   | 0.00   | 0.83     | 0.82     | 0.70     | 0.66      | 0.49    | 0.50     | 0.51    | 0.66     | 0.57     | 0.57     | 0.60   | 0.63    | 0.69     |
| 1.5-v1.2  |  | 1.06                                                  | 1.21   | 1.04    | 1.18   | 1.18   | 1.06   | 0.00     | 0.38     | 0.61     | 0.46      | 0.71    | 0.68     | 0.69    | 1.11     | 0.73     | 0.74     | 1.04   | 1.05    | 0.77     |
| 1.5-v1.4  |  | 1.10                                                  | 1.14   | 1.06    | 1.15   | 1.13   | 1.06   | 0.39     | 0.00     | 0.48     | 0.50      | 0.67    | 0.61     | 0.62    | 1.05     | 0.74     | 0.74     | 1.00   | 1.00    | 0.77     |
| 1.5-Base  |  | 0.82                                                  | 0.78   | 0.80    | 0.76   | 0.74   | 0.73   | 0.50     | 0.39     | 0.00     | 0.55      | 0.50    | 0.44     | 0.44    | 0.74     | 0.60     | 0.60     | 0.65   | 0.65    | 0.60     |
| 1.5-Dream |  | 1.09                                                  | 1.30   | 0.96    | 1.35   | 1.39   | 1.04   | 0.56     | 0.61     | 0.82     | 0.00      | 0.93    | 0.90     | 0.91    | 1.08     | 0.65     | 0.66     | 1.09   | 1.11    | 0.78     |
| 2.1-DPO   |  | 0.96                                                  | 0.65   | 1.07    | 0.88   | 0.74   | 0.93   | 1.05     | 0.98     | 0.89     | 1.12      | 0.00    | 0.17     | 0.17    | 1.07     | 1.08     | 1.08     | 1.09   | 1.11    | 1.07     |
| 2.1-Base  |  | 0.90                                                  | 0.65   | 1.00    | 0.82   | 0.73   | 0.88   | 0.93     | 0.83     | 0.74     | 1.00      | 0.16    | 0.00     | 0.01    | 1.00     | 1.00     | 1.00     | 1.00   | 1.00    | 1.00     |
| 2.1-Art   |  | 0.91                                                  | 0.65   | 1.02    | 0.82   | 0.73   | 0.89   | 0.95     | 0.84     | 0.73     | 1.01      | 0.15    | 0.01     | 0.00    | 1.00     | 1.00     | 1.00     | 1.01   | 0.99    | 1.00     |
| SD3-Real  |  | 0.80                                                  | 0.69   | 0.77    | 0.71   | 0.70   | 0.79   | 1.04     | 0.98     | 0.84     | 0.82      | 0.68    | 0.68     | 0.68    | 0.00     | 0.30     | 0.30     | 0.50   | 0.48    | 0.50     |
| SD3-Base  |  | 1.00                                                  | 1.00   | 0.91    | 1.00   | 1.00   | 1.00   | 1.00     | 1.00     | 1.00     | 0.73      | 1.00    | 1.00     | 1.00    | 0.43     | 0.00     | 0.00     | 0.62   | 0.62    | 0.49     |
| SD3-Anim  |  | 0.97                                                  | 0.97   | 0.88    | 0.96   | 0.97   | 0.97   | 0.99     | 0.98     | 0.98     | 0.72      | 0.98    | 0.97     | 0.97    | 0.42     | 0.00     | 0.00     | 0.59   | 0.60    | 0.48     |
| XL-DPO    |  | 0.77                                                  | 0.66   | 0.73    | 0.58   | 0.54   | 0.61   | 0.83     | 0.79     | 0.63     | 0.71      | 0.59    | 0.58     | 0.59    | 0.43     | 0.36     | 0.36     | 0.00   | 0.15    | 0.29     |
| XL-Base   |  | 0.84                                                  | 0.70   | 0.77    | 0.61   | 0.58   | 0.66   | 0.85     | 0.81     | 0.64     | 0.73      | 0.61    | 0.59     | 0.59    | 0.42     | 0.37     | 0.37     | 0.15   | 0.00    | 0.29     |
| XL-Light  |  | 0.97                                                  | 0.89   | 0.94    | 0.90   | 0.87   | 0.92   | 0.81     | 0.81     | 0.77     | 0.67      | 0.76    | 0.77     | 0.77    | 0.56     | 0.38     | 0.38     | 0.39   | 0.37    | 0.00     |

Table A37. Normalized Wasserstein Distance Matrix. Each column normalized by max distance to base models. ■ Short, ■ Medium-low, ■ Medium-high, ■ Long distance.

|           |  | Prompt: A Photo Of A Vibrant Single Flower In A Dimmed Studio |        |         |        |        |        |          |          |          |           |         |          |         |          |          |          |        |         |          |
|-----------|--|---------------------------------------------------------------|--------|---------|--------|--------|--------|----------|----------|----------|-----------|---------|----------|---------|----------|----------|----------|--------|---------|----------|
|           |  | Flux                                                          |        |         | Kand   |        |        | SD1.5    |          |          |           | SD2.1   |          |         | SD3      |          |          | SDXL   |         |          |
|           |  | F-Base                                                        | F-LoRA | F-Turbo | K-Base | K-Naru | K-Poke | 1.5-v1.2 | 1.5-v1.4 | 1.5-Base | 1.5-Dream | 2.1-DPO | 2.1-Base | 2.1-Art | SD3-Real | SD3-Base | SD3-Anim | XL-DPO | XL-Base | XL-Light |
| F-Base    |  | 0.00                                                          | 0.34   | 0.15    | 0.32   | 0.36   | 0.35   | 0.97     | 0.93     | 0.94     | 0.94      | 0.93    | 0.90     | 0.90    | 0.50     | 0.39     | 0.40     | 0.86   | 0.91    | 0.72     |
| F-LoRA    |  | 0.30                                                          | 0.00   | 0.40    | 0.58   | 0.62   | 0.65   | 1.19     | 1.06     | 1.02     | 0.92      | 0.86    | 0.79     | 0.78    | 0.69     | 0.68     | 0.70     | 0.76   | 0.78    | 0.83     |
| F-Turbo   |  | 0.14                                                          | 0.42   | 0.00    | 0.35   | 0.38   | 0.36   | 0.84     | 0.81     | 0.83     | 0.87      | 0.87    | 0.85     | 0.85    | 0.50     | 0.39     | 0.39     | 0.80   | 0.84    | 0.72     |
| K-Base    |  | 0.36                                                          | 0.73   | 0.41    | 0.00   | 0.08   | 0.10   | 0.96     | 1.00     | 1.00     | 1.00      | 1.00    | 1.00     | 1.00    | 0.42     | 0.26     | 0.26     | 1.00   | 1.00    | 0.62     |
| K-Naru    |  | 0.39                                                          | 0.75   | 0.44    | 0.07   | 0.00   | 0.14   | 0.92     | 0.89     | 0.93     | 1.01      | 0.95    | 0.97     | 0.97    | 0.38     | 0.29     | 0.29     | 0.92   | 0.93    | 0.66     |
| K-Poke    |  | 0.37                                                          | 0.78   | 0.41    | 0.10   | 0.14   | 0.00   | 0.89     | 0.92     | 0.93     | 0.89      | 0.98    | 0.95     | 0.95    | 0.43     | 0.22     | 0.22     | 0.95   | 0.97    | 0.54     |
| 1.5-v1.2  |  | 0.70                                                          | 0.97   | 0.65    | 0.63   | 0.62   | 0.61   | 0.00     | 0.45     | 0.44     | 0.71      | 0.65    | 0.65     | 0.66    | 0.78     | 0.72     | 0.72     | 0.70   | 0.71    | 0.79     |
| 1.5-v1.4  |  | 0.78                                                          | 1.00   | 0.72    | 0.76   | 0.70   | 0.73   | 0.52     | 0.00     | 0.35     | 0.74      | 0.55    | 0.58     | 0.58    | 0.81     | 0.82     | 0.83     | 0.62   | 0.66    | 0.92     |
| 1.5-Base  |  | 0.82                                                          | 1.00   | 0.77    | 0.79   | 0.75   | 0.77   | 0.53     | 0.36     | 0.00     | 0.68      | 0.56    | 0.56     | 0.57    | 0.85     | 0.88     | 0.87     | 0.67   | 0.68    | 0.88     |
| 1.5-Dream |  | 0.88                                                          | 0.98   | 0.87    | 0.85   | 0.88   | 0.79   | 0.92     | 0.83     | 0.74     | 0.00      | 0.84    | 0.67     | 0.67    | 1.11     | 1.05     | 1.04     | 0.74   | 0.74    | 0.62     |
| 2.1-DPO   |  | 0.93                                                          | 0.97   | 0.93    | 0.91   | 0.88   | 0.93   | 0.90     | 0.65     | 0.65     | 0.90      | 0.00    | 0.20     | 0.21    | 0.88     | 0.89     | 0.90     | 0.61   | 0.66    | 1.04     |
| 2.1-Base  |  | 1.00                                                          | 0.99   | 1.00    | 1.00   | 1.00   | 1.00   | 1.00     | 0.77     | 0.72     | 0.79      | 0.23    | 0.00     | 0.00    | 1.00     | 1.00     | 1.00     | 0.64   | 0.72    | 1.00     |
| 2.1-Art   |  | 1.00                                                          | 0.98   | 1.00    | 1.00   | 1.00   | 1.00   | 1.00     | 0.77     | 0.72     | 0.79      | 0.23    | 0.00     | 0.00    | 1.00     | 1.00     | 1.00     | 0.64   | 0.72    | 0.99     |
| SD3-Real  |  | 0.38                                                          | 0.58   | 0.40    | 0.29   | 0.26   | 0.31   | 0.81     | 0.73     | 0.74     | 0.89      | 0.66    | 0.68     | 0.68    | 0.00     | 0.26     | 0.27     | 0.63   | 0.67    | 0.69     |
| SD3-Base  |  | 0.33                                                          | 0.65   | 0.35    | 0.20   | 0.23   | 0.18   | 0.83     | 0.83     | 0.85     | 0.94      | 0.75    | 0.76     | 0.76    | 0.29     | 0.00     | 0.00     | 0.77   | 0.82    | 0.64     |
| SD3-Anim  |  | 0.33                                                          | 0.65   | 0.35    | 0.19   | 0.23   | 0.17   | 0.82     | 0.82     | 0.84     | 0.93      | 0.75    | 0.75     | 0.75    | 0.30     | 0.00     | 0.00     | 0.77   | 0.83    | 0.63     |
| XL-DPO    |  | 0.66                                                          | 0.65   | 0.65    | 0.69   | 0.65   | 0.68   | 0.74     | 0.57     | 0.59     | 0.60      | 0.47    | 0.44     | 0.44    | 0.63     | 0.70     | 0.71     | 0.00   | 0.21    | 0.65     |
| XL-Base   |  | 0.68                                                          | 0.66   | 0.67    | 0.67   | 0.65   | 0.69   | 0.74     | 0.59     | 0.58     | 0.59      | 0.49    | 0.49     | 0.49    | 0.67     | 0.73     | 0.74     | 0.20   | 0.00    | 0.63     |
| XL-Light  |  | 0.52                                                          | 0.68   | 0.55    | 0.40   | 0.44   | 0.37   | 0.78     | 0.79     | 0.73     | 0.48      | 0.75    | 0.65     | 0.65    | 0.66     | 0.55     | 0.54     | 0.61   | 0.61    | 0.00     |

Table A38. Normalized Wasserstein Distance Matrix. Each column normalized by max distance to base models. ■ Short, ■ Medium-low, ■ Medium-high, ■ Long distance.

| Prompt: A Photo Of A Vibrant Single Flower On A Pot |        |        |         |        |        |        |          |          |          |           |         |          |         |          |          |          |        |         |          |
|-----------------------------------------------------|--------|--------|---------|--------|--------|--------|----------|----------|----------|-----------|---------|----------|---------|----------|----------|----------|--------|---------|----------|
|                                                     | Flux   |        |         | Kand   |        |        | SD1.5    |          |          |           | SD2.1   |          |         | SD3      |          |          | SDXL   |         |          |
|                                                     | F-Base | F-LoRA | F-Turbo | K-Base | K-Naru | K-Poke | 1.5-v1.2 | 1.5-v1.4 | 1.5-Base | 1.5-Dream | 2.1-DPO | 2.1-Base | 2.1-Art | SD3-Real | SD3-Base | SD3-Anim | XL-DPO | XL-Base | XL-Light |
| F-Base                                              | 0.00   | 0.31   | 0.21    | 0.34   | 0.34   | 0.43   | 1.00     | 1.00     | 1.00     | 1.00      | 1.00    | 1.00     | 1.00    | 0.47     | 0.86     | 0.86     | 0.86   | 0.90    | 0.85     |
| F-LoRA                                              | 0.31   | 0.00   | 0.39    | 0.51   | 0.52   | 0.60   | 1.01     | 1.03     | 1.00     | 1.05      | 1.05    | 1.05     | 1.05    | 0.47     | 0.81     | 0.81     | 0.80   | 0.87    | 0.90     |
| F-Turbo                                             | 0.19   | 0.36   | 0.00    | 0.33   | 0.35   | 0.39   | 0.95     | 0.95     | 0.94     | 0.95      | 0.89    | 0.90     | 0.90    | 0.47     | 0.72     | 0.73     | 0.76   | 0.81    | 0.69     |
| K-Base                                              | 0.31   | 0.47   | 0.32    | 0.00   | 0.15   | 0.23   | 0.95     | 0.93     | 0.91     | 0.91      | 0.73    | 0.76     | 0.77    | 0.41     | 0.72     | 0.72     | 0.65   | 0.74    | 0.65     |
| K-Naru                                              | 0.30   | 0.46   | 0.33    | 0.15   | 0.00   | 0.25   | 0.93     | 0.92     | 0.89     | 0.91      | 0.76    | 0.78     | 0.79    | 0.42     | 0.70     | 0.71     | 0.63   | 0.71    | 0.61     |
| K-Poke                                              | 0.40   | 0.55   | 0.39    | 0.23   | 0.26   | 0.00   | 1.00     | 0.97     | 0.93     | 0.94      | 0.77    | 0.76     | 0.77    | 0.32     | 0.65     | 0.65     | 0.56   | 0.65    | 0.54     |
| 1.5-v1.2                                            | 1.15   | 1.15   | 1.16    | 1.19   | 1.20   | 1.24   | 0.00     | 0.33     | 0.32     | 0.41      | 1.08    | 0.98     | 0.97    | 1.31     | 1.19     | 1.19     | 1.31   | 1.27    | 1.21     |
| 1.5-v1.4                                            | 0.94   | 0.96   | 0.95    | 0.96   | 0.97   | 0.98   | 0.27     | 0.00     | 0.24     | 0.44      | 0.79    | 0.73     | 0.72    | 1.01     | 0.96     | 0.96     | 1.00   | 0.99    | 0.97     |
| 1.5-Base                                            | 1.00   | 1.00   | 1.00    | 1.00   | 1.00   | 1.00   | 0.28     | 0.26     | 0.00     | 0.46      | 0.81    | 0.75     | 0.74    | 1.00     | 1.00     | 1.00     | 1.00   | 1.00    | 1.00     |
| 1.5-Dream                                           | 0.95   | 0.99   | 0.96    | 0.95   | 0.98   | 0.96   | 0.34     | 0.44     | 0.44     | 0.00      | 1.00    | 0.88     | 0.87    | 1.11     | 0.86     | 0.87     | 1.04   | 1.01    | 0.91     |
| 2.1-DPO                                             | 0.77   | 0.80   | 0.74    | 0.62   | 0.66   | 0.64   | 0.73     | 0.65     | 0.63     | 0.81      | 0.00    | 0.26     | 0.27    | 0.60     | 0.91     | 0.91     | 0.81   | 0.82    | 0.80     |
| 2.1-Base                                            | 0.87   | 0.91   | 0.84    | 0.72   | 0.76   | 0.71   | 0.75     | 0.67     | 0.65     | 0.80      | 0.30    | 0.00     | 0.02    | 0.64     | 0.95     | 0.94     | 0.87   | 0.83    | 0.86     |
| 2.1-Art                                             | 0.85   | 0.90   | 0.82    | 0.72   | 0.76   | 0.71   | 0.73     | 0.66     | 0.63     | 0.78      | 0.30    | 0.02     | 0.00    | 0.64     | 0.94     | 0.93     | 0.87   | 0.84    | 0.85     |
| SD3-Real                                            | 0.58   | 0.58   | 0.62    | 0.56   | 0.59   | 0.42   | 1.41     | 1.33     | 1.24     | 1.44      | 0.96    | 0.91     | 0.93    | 0.00     | 0.84     | 0.84     | 0.69   | 0.83    | 0.85     |
| SD3-Base                                            | 0.67   | 0.62   | 0.60    | 0.61   | 0.62   | 0.54   | 0.81     | 0.80     | 0.78     | 0.70      | 0.91    | 0.85     | 0.85    | 0.53     | 0.00     | 0.00     | 0.50   | 0.55    | 0.47     |
| SD3-Anim                                            | 0.66   | 0.62   | 0.59    | 0.60   | 0.61   | 0.53   | 0.79     | 0.78     | 0.76     | 0.70      | 0.90    | 0.83     | 0.84    | 0.52     | 0.00     | 0.00     | 0.50   | 0.54    | 0.47     |
| XL-DPO                                              | 0.64   | 0.60   | 0.60    | 0.53   | 0.53   | 0.45   | 0.85     | 0.79     | 0.75     | 0.82      | 0.78    | 0.74     | 0.76    | 0.42     | 0.48     | 0.49     | 0.00   | 0.26    | 0.43     |
| XL-Base                                             | 0.63   | 0.61   | 0.61    | 0.57   | 0.56   | 0.49   | 0.78     | 0.75     | 0.71     | 0.75      | 0.74    | 0.68     | 0.69    | 0.48     | 0.50     | 0.50     | 0.25   | 0.00    | 0.45     |
| XL-Light                                            | 0.69   | 0.73   | 0.60    | 0.58   | 0.56   | 0.48   | 0.86     | 0.84     | 0.81     | 0.78      | 0.84    | 0.80     | 0.81    | 0.56     | 0.49     | 0.50     | 0.47   | 0.52    | 0.00     |

Table A39. Normalized Wasserstein Distance Matrix. Each column normalized by max distance to base models. ■ Short, ■ Medium-low, ■ Medium-high, ■ Long distance.

| Prompt: A Photo Of A Vibrant Single Flower On A Vase |        |        |         |        |        |        |          |          |          |           |         |          |         |          |          |          |        |         |          |
|------------------------------------------------------|--------|--------|---------|--------|--------|--------|----------|----------|----------|-----------|---------|----------|---------|----------|----------|----------|--------|---------|----------|
|                                                      | Flux   |        |         | Kand   |        |        | SD1.5    |          |          |           | SD2.1   |          |         | SD3      |          |          | SDXL   |         |          |
|                                                      | F-Base | F-LoRA | F-Turbo | K-Base | K-Naru | K-Poke | 1.5-v1.2 | 1.5-v1.4 | 1.5-Base | 1.5-Dream | 2.1-DPO | 2.1-Base | 2.1-Art | SD3-Real | SD3-Base | SD3-Anim | XL-DPO | XL-Base | XL-Light |
| F-Base                                               | 0.00   | 0.41   | 0.20    | 0.54   | 0.56   | 0.89   | 1.00     | 1.00     | 1.00     | 0.95      | 1.00    | 1.00     | 1.00    | 0.79     | 0.76     | 0.76     | 1.00   | 1.00    | 1.00     |
| F-LoRA                                               | 0.38   | 0.00   | 0.46    | 0.77   | 0.65   | 1.01   | 1.02     | 1.00     | 0.96     | 1.01      | 0.94    | 0.90     | 0.90    | 0.73     | 0.65     | 0.65     | 0.89   | 0.89    | 0.91     |
| F-Turbo                                              | 0.18   | 0.45   | 0.00    | 0.51   | 0.55   | 0.78   | 0.90     | 0.90     | 0.91     | 0.86      | 0.91    | 0.92     | 0.92    | 0.70     | 0.72     | 0.72     | 0.90   | 0.90    | 0.89     |
| K-Base                                               | 0.41   | 0.62   | 0.42    | 0.00   | 0.17   | 0.31   | 0.73     | 0.69     | 0.73     | 0.64      | 0.75    | 0.75     | 0.75    | 0.65     | 0.64     | 0.63     | 0.60   | 0.59    | 0.62     |
| K-Naru                                               | 0.44   | 0.55   | 0.47    | 0.17   | 0.00   | 0.33   | 0.84     | 0.79     | 0.81     | 0.81      | 0.77    | 0.77     | 0.77    | 0.52     | 0.53     | 0.52     | 0.60   | 0.59    | 0.68     |
| K-Poke                                               | 0.72   | 0.89   | 0.68    | 0.34   | 0.34   | 0.00   | 0.82     | 0.77     | 0.84     | 0.78      | 0.84    | 0.77     | 0.77    | 0.60     | 0.69     | 0.68     | 0.47   | 0.50    | 0.69     |
| 1.5-v1.2                                             | 1.15   | 1.26   | 1.13    | 1.12   | 1.23   | 1.16   | 0.00     | 0.38     | 0.48     | 0.48      | 0.91    | 0.81     | 0.80    | 1.28     | 1.29     | 1.30     | 0.79   | 0.76    | 0.88     |
| 1.5-v1.4                                             | 1.05   | 1.13   | 1.03    | 0.97   | 1.06   | 0.99   | 0.35     | 0.00     | 0.35     | 0.49      | 0.83    | 0.68     | 0.68    | 1.09     | 1.12     | 1.12     | 0.63   | 0.61    | 0.74     |
| 1.5-Base                                             | 0.97   | 1.00   | 0.97    | 0.94   | 1.00   | 1.00   | 0.41     | 0.32     | 0.00     | 0.54      | 0.78    | 0.67     | 0.67    | 1.00     | 1.00     | 1.00     | 0.67   | 0.61    | 0.80     |
| 1.5-Dream                                            | 1.13   | 1.29   | 1.11    | 1.02   | 1.24   | 1.15   | 0.49     | 0.55     | 0.67     | 0.00      | 1.11    | 1.01     | 0.99    | 1.55     | 1.41     | 1.41     | 0.94   | 0.87    | 0.79     |
| 2.1-DPO                                              | 0.85   | 0.85   | 0.83    | 0.84   | 0.83   | 0.88   | 0.67     | 0.67     | 0.68     | 0.79      | 0.00    | 0.25     | 0.25    | 0.81     | 0.89     | 0.89     | 0.66   | 0.67    | 0.86     |
| 2.1-Base                                             | 1.00   | 0.96   | 1.00    | 1.00   | 0.97   | 0.94   | 0.70     | 0.65     | 0.69     | 0.85      | 0.29    | 0.00     | 0.00    | 0.83     | 0.95     | 0.95     | 0.60   | 0.65    | 0.87     |
| 2.1-Art                                              | 1.01   | 0.98   | 1.01    | 1.01   | 0.98   | 0.95   | 0.70     | 0.65     | 0.69     | 0.84      | 0.30    | 0.00     | 0.00    | 0.85     | 0.96     | 0.97     | 0.60   | 0.65    | 0.88     |
| SD3-Real                                             | 0.75   | 0.75   | 0.73    | 0.82   | 0.64   | 0.70   | 1.07     | 0.99     | 0.98     | 1.24      | 0.91    | 0.79     | 0.80    | 0.00     | 0.43     | 0.43     | 0.61   | 0.67    | 1.04     |
| SD3-Base                                             | 0.65   | 0.59   | 0.66    | 0.72   | 0.57   | 0.72   | 0.95     | 0.90     | 0.87     | 1.00      | 0.90    | 0.81     | 0.81    | 0.38     | 0.00     | 0.00     | 0.65   | 0.64    | 0.79     |
| SD3-Anim                                             | 0.64   | 0.59   | 0.65    | 0.70   | 0.56   | 0.70   | 0.94     | 0.89     | 0.86     | 0.99      | 0.88    | 0.80     | 0.80    | 0.38     | 0.00     | 0.00     | 0.64   | 0.63    | 0.78     |
| XL-DPO                                               | 0.89   | 0.86   | 0.87    | 0.71   | 0.68   | 0.51   | 0.62     | 0.53     | 0.61     | 0.70      | 0.70    | 0.54     | 0.53    | 0.57     | 0.68     | 0.68     | 0.00   | 0.18    | 0.55     |
| XL-Base                                              | 0.88   | 0.84   | 0.86    | 0.68   | 0.66   | 0.54   | 0.58     | 0.51     | 0.56     | 0.64      | 0.69    | 0.57     | 0.57    | 0.62     | 0.66     | 0.66     | 0.17   | 0.00    | 0.52     |
| XL-Light                                             | 0.77   | 0.75   | 0.75    | 0.63   | 0.67   | 0.65   | 0.59     | 0.54     | 0.63     | 0.51      | 0.78    | 0.67     | 0.67    | 0.83     | 0.72     | 0.72     | 0.47   | 0.46    | 0.00     |

Table A40. Normalized Wasserstein Distance Matrix. Each column normalized by max distance to base models. ■ Short, ■ Medium-low, ■ Medium-high, ■ Long distance.

|           |  | Prompt: A Photo Of A Wild Animal In A Dimmed Studio |        |         |        |        |        |          |          |          |           |         |          |         |          |          |          |        |         |          |
|-----------|--|-----------------------------------------------------|--------|---------|--------|--------|--------|----------|----------|----------|-----------|---------|----------|---------|----------|----------|----------|--------|---------|----------|
|           |  | Flux                                                |        |         | Kand   |        |        | SD1.5    |          |          |           | SD2.1   |          |         | SD3      |          |          | SDXL   |         |          |
|           |  | F-Base                                              | F-LoRA | F-Turbo | K-Base | K-Naru | K-Poke | 1.5-v1.2 | 1.5-v1.4 | 1.5-Base | 1.5-Dream | 2.1-DPO | 2.1-Base | 2.1-Art | SD3-Real | SD3-Base | SD3-Anim | XL-DPO | XL-Base | XL-Light |
| F-Base    |  | 0.00                                                | 0.51   | 0.17    | 1.00   | 1.00   | 0.98   | 1.00     | 1.00     | 1.00     | 1.00      | 0.62    | 0.56     | 0.55    | 0.43     | 0.72     | 0.70     | 1.00   | 1.00    | 0.98     |
| F-LoRA    |  | 0.40                                                | 0.00   | 0.42    | 0.79   | 0.71   | 0.91   | 0.79     | 0.79     | 0.79     | 0.81      | 0.53    | 0.51     | 0.52    | 0.49     | 0.84     | 0.83     | 0.65   | 0.67    | 0.70     |
| F-Turbo   |  | 0.18                                                | 0.58   | 0.00    | 1.18   | 1.17   | 1.08   | 1.09     | 1.09     | 1.09     | 1.12      | 0.71    | 0.64     | 0.63    | 0.49     | 0.80     | 0.78     | 1.09   | 1.14    | 1.07     |
| K-Base    |  | 0.60                                                | 0.60   | 0.65    | 0.00   | 0.13   | 0.50   | 0.47     | 0.49     | 0.53     | 0.46      | 0.53    | 0.58     | 0.57    | 0.55     | 0.53     | 0.52     | 0.64   | 0.51    | 0.82     |
| K-Naru    |  | 0.62                                                | 0.56   | 0.67    | 0.13   | 0.00   | 0.54   | 0.44     | 0.47     | 0.49     | 0.43      | 0.54    | 0.60     | 0.60    | 0.55     | 0.55     | 0.55     | 0.59   | 0.47    | 0.76     |
| K-Poke    |  | 0.68                                                | 0.80   | 0.69    | 0.58   | 0.61   | 0.00   | 0.63     | 0.71     | 0.70     | 0.59      | 0.41    | 0.48     | 0.46    | 0.51     | 0.58     | 0.56     | 0.94   | 0.79    | 1.24     |
| 1.5-v1.2  |  | 1.11                                                | 1.10   | 1.12    | 0.86   | 0.78   | 1.00   | 0.00     | 0.19     | 0.22     | 0.23      | 1.06    | 1.06     | 1.06    | 1.10     | 1.00     | 1.00     | 1.00   | 0.84    | 1.07     |
| 1.5-v1.4  |  | 1.05                                                | 1.06   | 1.06    | 0.86   | 0.79   | 1.08   | 0.18     | 0.00     | 0.18     | 0.27      | 1.07    | 1.05     | 1.05    | 1.07     | 1.02     | 1.02     | 1.01   | 0.85    | 0.99     |
| 1.5-Base  |  | 1.00                                                | 1.00   | 1.00    | 0.88   | 0.79   | 1.00   | 0.20     | 0.17     | 0.00     | 0.30      | 1.00    | 1.00     | 1.00    | 1.00     | 1.00     | 1.00     | 0.94   | 0.79    | 0.93     |
| 1.5-Dream |  | 0.98                                                | 1.01   | 1.01    | 0.75   | 0.68   | 0.83   | 0.20     | 0.25     | 0.30     | 0.00      | 0.89    | 0.94     | 0.94    | 0.99     | 0.80     | 0.81     | 0.92   | 0.72    | 1.00     |
| 2.1-DPO   |  | 0.47                                                | 0.52   | 0.51    | 0.68   | 0.67   | 0.45   | 0.73     | 0.78     | 0.77     | 0.70      | 0.00    | 0.19     | 0.18    | 0.32     | 0.58     | 0.56     | 0.71   | 0.64    | 0.97     |
| 2.1-Base  |  | 0.47                                                | 0.54   | 0.49    | 0.81   | 0.81   | 0.57   | 0.80     | 0.84     | 0.84     | 0.81      | 0.20    | 0.00     | 0.01    | 0.33     | 0.64     | 0.62     | 0.75   | 0.73    | 1.00     |
| 2.1-Art   |  | 0.47                                                | 0.55   | 0.49    | 0.80   | 0.81   | 0.56   | 0.80     | 0.84     | 0.84     | 0.81      | 0.20    | 0.01     | 0.00    | 0.33     | 0.63     | 0.61     | 0.76   | 0.74    | 1.01     |
| SD3-Real  |  | 0.36                                                | 0.53   | 0.39    | 0.78   | 0.76   | 0.62   | 0.84     | 0.86     | 0.85     | 0.86      | 0.36    | 0.34     | 0.33    | 0.00     | 0.57     | 0.55     | 0.77   | 0.75    | 0.92     |
| SD3-Base  |  | 0.46                                                | 0.67   | 0.47    | 0.56   | 0.56   | 0.53   | 0.57     | 0.61     | 0.63     | 0.52      | 0.47    | 0.48     | 0.47    | 0.42     | 0.00     | 0.00     | 0.68   | 0.59    | 0.73     |
| SD3-Anim  |  | 0.45                                                | 0.67   | 0.46    | 0.56   | 0.57   | 0.52   | 0.58     | 0.63     | 0.64     | 0.53      | 0.47    | 0.48     | 0.47    | 0.41     | 0.00     | 0.00     | 0.68   | 0.60    | 0.74     |
| XL-DPO    |  | 0.54                                                | 0.44   | 0.54    | 0.57   | 0.51   | 0.73   | 0.48     | 0.52     | 0.50     | 0.50      | 0.49    | 0.48     | 0.49    | 0.49     | 0.57     | 0.57     | 0.00   | 0.26    | 0.47     |
| XL-Base   |  | 0.61                                                | 0.52   | 0.63    | 0.51   | 0.46   | 0.69   | 0.46     | 0.49     | 0.48     | 0.45      | 0.50    | 0.53     | 0.53    | 0.54     | 0.57     | 0.56     | 0.30   | 0.00    | 0.48     |
| XL-Light  |  | 0.55                                                | 0.50   | 0.55    | 0.77   | 0.69   | 1.00   | 0.54     | 0.53     | 0.52     | 0.57      | 0.71    | 0.67     | 0.68    | 0.61     | 0.65     | 0.65     | 0.49   | 0.45    | 0.00     |

Table A41. Normalized Wasserstein Distance Matrix. Each column normalized by max distance to base models. ■ Short, ■ Medium-low, ■ Medium-high, ■ Long distance.

|           |  | Prompt: A Photo Of A Wild Animal In A Forest |        |         |        |        |        |          |          |          |           |         |          |         |          |          |          |        |         |          |
|-----------|--|----------------------------------------------|--------|---------|--------|--------|--------|----------|----------|----------|-----------|---------|----------|---------|----------|----------|----------|--------|---------|----------|
|           |  | Flux                                         |        |         | Kand   |        |        | SD1.5    |          |          |           | SD2.1   |          |         | SD3      |          |          | SDXL   |         |          |
|           |  | F-Base                                       | F-LoRA | F-Turbo | K-Base | K-Naru | K-Poke | 1.5-v1.2 | 1.5-v1.4 | 1.5-Base | 1.5-Dream | 2.1-DPO | 2.1-Base | 2.1-Art | SD3-Real | SD3-Base | SD3-Anim | XL-DPO | XL-Base | XL-Light |
| F-Base    |  | 0.00                                         | 0.38   | 0.25    | 0.74   | 0.69   | 0.53   | 1.00     | 0.97     | 1.00     | 1.00      | 1.00    | 1.00     | 1.00    | 0.93     | 0.86     | 0.87     | 0.80   | 0.72    | 0.60     |
| F-LoRA    |  | 0.39                                         | 0.00   | 0.51    | 0.63   | 0.65   | 0.58   | 1.08     | 0.97     | 0.92     | 1.12      | 1.01    | 1.00     | 1.01    | 1.02     | 1.10     | 1.11     | 0.83   | 0.72    | 0.54     |
| F-Turbo   |  | 0.24                                         | 0.48   | 0.00    | 0.80   | 0.74   | 0.53   | 0.97     | 0.93     | 0.99     | 0.92      | 0.95    | 0.96     | 0.96    | 0.88     | 0.77     | 0.76     | 0.77   | 0.77    | 0.64     |
| K-Base    |  | 0.70                                         | 0.57   | 0.78    | 0.00   | 0.17   | 0.33   | 0.90     | 0.81     | 0.78     | 0.88      | 0.86    | 0.91     | 0.92    | 1.00     | 1.00     | 1.00     | 0.94   | 0.86    | 0.61     |
| K-Naru    |  | 0.60                                         | 0.53   | 0.65    | 0.15   | 0.00   | 0.30   | 0.81     | 0.75     | 0.72     | 0.76      | 0.79    | 0.84     | 0.85    | 0.84     | 0.91     | 0.90     | 0.79   | 0.75    | 0.56     |
| K-Poke    |  | 0.52                                         | 0.54   | 0.53    | 0.34   | 0.34   | 0.00   | 0.92     | 0.88     | 0.91     | 0.83      | 0.99    | 1.02     | 1.02    | 1.05     | 1.03     | 1.03     | 1.01   | 0.96    | 0.70     |
| 1.5-v1.2  |  | 1.09                                         | 1.11   | 1.07    | 1.02   | 1.02   | 1.02   | 0.00     | 0.35     | 0.47     | 0.40      | 0.57    | 0.52     | 0.51    | 0.59     | 0.61     | 0.60     | 1.13   | 1.17    | 1.25     |
| 1.5-v1.4  |  | 1.03                                         | 0.98   | 1.00    | 0.90   | 0.92   | 0.95   | 0.34     | 0.00     | 0.41     | 0.53      | 0.54    | 0.48     | 0.46    | 0.68     | 0.65     | 0.65     | 1.17   | 1.18    | 1.14     |
| 1.5-Base  |  | 1.00                                         | 0.88   | 1.00    | 0.82   | 0.83   | 0.92   | 0.43     | 0.39     | 0.00     | 0.60      | 0.52    | 0.49     | 0.47    | 0.59     | 0.67     | 0.67     | 0.92   | 0.91    | 0.94     |
| 1.5-Dream |  | 0.97                                         | 1.04   | 0.91    | 0.90   | 0.85   | 0.83   | 0.36     | 0.49     | 0.59     | 0.00      | 0.54    | 0.60     | 0.59    | 0.53     | 0.57     | 0.56     | 0.93   | 1.01    | 1.06     |
| 2.1-DPO   |  | 0.85                                         | 0.82   | 0.81    | 0.77   | 0.78   | 0.86   | 0.45     | 0.43     | 0.44     | 0.47      | 0.00    | 0.32     | 0.32    | 0.54     | 0.54     | 0.53     | 0.83   | 0.85    | 0.81     |
| 2.1-Base  |  | 0.92                                         | 0.88   | 0.90    | 0.88   | 0.90   | 0.95   | 0.44     | 0.41     | 0.45     | 0.57      | 0.35    | 0.00     | 0.01    | 0.61     | 0.57     | 0.57     | 1.00   | 1.00    | 0.95     |
| 2.1-Art   |  | 0.92                                         | 0.89   | 0.90    | 0.89   | 0.91   | 0.96   | 0.43     | 0.40     | 0.44     | 0.56      | 0.34    | 0.01     | 0.00    | 0.59     | 0.55     | 0.56     | 0.99   | 1.00    | 0.96     |
| SD3-Real  |  | 1.13                                         | 1.18   | 1.09    | 1.28   | 1.18   | 1.30   | 0.66     | 0.78     | 0.72     | 0.66      | 0.78    | 0.80     | 0.78    | 0.00     | 0.73     | 0.73     | 0.78   | 0.91    | 1.13     |
| SD3-Base  |  | 0.82                                         | 1.00   | 0.74    | 1.00   | 1.00   | 1.00   | 0.54     | 0.59     | 0.64     | 0.56      | 0.61    | 0.59     | 0.57    | 0.57     | 0.00     | 0.00     | 0.93   | 0.99    | 1.00     |
| SD3-Anim  |  | 0.83                                         | 1.01   | 0.74    | 1.00   | 1.00   | 1.00   | 0.53     | 0.59     | 0.64     | 0.55      | 0.60    | 0.59     | 0.58    | 0.57     | 0.00     | 0.00     | 0.93   | 0.98    | 1.00     |
| XL-DPO    |  | 0.75                                         | 0.74   | 0.73    | 0.92   | 0.86   | 0.97   | 0.98     | 1.04     | 0.86     | 0.90      | 0.92    | 1.02     | 1.01    | 0.60     | 0.92     | 0.91     | 0.00   | 0.29    | 0.44     |
| XL-Base   |  | 0.64                                         | 0.61   | 0.70    | 0.81   | 0.77   | 0.88   | 0.97     | 1.00     | 0.81     | 0.93      | 0.90    | 0.97     | 0.97    | 0.67     | 0.93     | 0.92     | 0.28   | 0.00    | 0.37     |
| XL-Light  |  | 0.54                                         | 0.46   | 0.59    | 0.58   | 0.58   | 0.64   | 1.03     | 0.97     | 0.84     | 0.98      | 0.85    | 0.93     | 0.94    | 0.83     | 0.94     | 0.94     | 0.42   | 0.37    | 0.00     |

Table A42. Normalized Wasserstein Distance Matrix. Each column normalized by max distance to base models. ■ Short, ■ Medium-low, ■ Medium-high, ■ Long distance.

| Prompt: A Photo Of A Wild Animal In A Grassland |        |        |         |        |        |        |          |          |          |           |         |          |         |          |          |          |        |         |          |
|-------------------------------------------------|--------|--------|---------|--------|--------|--------|----------|----------|----------|-----------|---------|----------|---------|----------|----------|----------|--------|---------|----------|
|                                                 | Flux   |        |         | Kand   |        |        | SD1.5    |          |          |           | SD2.1   |          |         | SD3      |          |          | SDXL   |         |          |
|                                                 | F-Base | F-LoRA | F-Turbo | K-Base | K-Naru | K-Poke | 1.5-v1.2 | 1.5-v1.4 | 1.5-Base | 1.5-Dream | 2.1-DPO | 2.1-Base | 2.1-Art | SD3-Real | SD3-Base | SD3-Anim | XL-DPO | XL-Base | XL-Light |
| F-Base                                          | 0.00   | 0.23   | 0.15    | 1.00   | 1.00   | 0.96   | 1.00     | 1.00     | 1.00     | 1.00      | 1.00    | 1.00     | 1.00    | 1.00     | 0.88     | 0.92     | 1.00   | 1.00    | 1.00     |
| F-LoRA                                          | 0.22   | 0.00   | 0.21    | 1.10   | 1.04   | 1.07   | 1.00     | 0.96     | 0.96     | 1.02      | 0.88    | 0.90     | 0.90    | 0.98     | 1.07     | 1.11     | 0.93   | 0.90    | 0.82     |
| F-Turbo                                         | 0.14   | 0.21   | 0.00    | 1.03   | 1.01   | 1.01   | 0.96     | 0.95     | 0.95     | 0.98      | 0.94    | 0.95     | 0.95    | 0.94     | 0.86     | 0.90     | 0.99   | 0.99    | 0.96     |
| K-Base                                          | 0.62   | 0.71   | 0.68    | 0.00   | 0.22   | 0.31   | 0.70     | 0.61     | 0.60     | 0.61      | 0.63    | 0.57     | 0.55    | 0.79     | 0.75     | 0.78     | 0.45   | 0.45    | 0.66     |
| K-Naru                                          | 0.64   | 0.69   | 0.67    | 0.23   | 0.00   | 0.34   | 0.69     | 0.60     | 0.61     | 0.63      | 0.61    | 0.56     | 0.54    | 0.74     | 0.76     | 0.79     | 0.45   | 0.44    | 0.65     |
| K-Poke                                          | 0.62   | 0.72   | 0.69    | 0.32   | 0.34   | 0.00   | 0.72     | 0.62     | 0.65     | 0.63      | 0.69    | 0.62     | 0.61    | 0.80     | 0.73     | 0.77     | 0.44   | 0.51    | 0.78     |
| 1.5-v1.2                                        | 1.09   | 1.13   | 1.09    | 1.22   | 1.18   | 1.20   | 0.00     | 0.25     | 0.29     | 0.26      | 0.52    | 0.60     | 0.58    | 0.70     | 1.03     | 1.01     | 0.80   | 0.87    | 0.95     |
| 1.5-v1.4                                        | 1.00   | 0.99   | 0.99    | 0.97   | 0.94   | 0.95   | 0.22     | 0.00     | 0.20     | 0.28      | 0.47    | 0.48     | 0.46    | 0.66     | 0.89     | 0.88     | 0.56   | 0.64    | 0.81     |
| 1.5-Base                                        | 1.00   | 1.00   | 1.00    | 0.95   | 0.96   | 1.00   | 0.26     | 0.20     | 0.00     | 0.27      | 0.49    | 0.47     | 0.46    | 0.75     | 1.00     | 1.00     | 0.61   | 0.66    | 0.80     |
| 1.5-Dream                                       | 1.05   | 1.12   | 1.09    | 1.02   | 1.04   | 1.01   | 0.25     | 0.30     | 0.28     | 0.00      | 0.58    | 0.62     | 0.60    | 0.79     | 1.00     | 0.99     | 0.71   | 0.81    | 0.91     |
| 2.1-DPO                                         | 1.01   | 0.92   | 0.99    | 1.02   | 0.97   | 1.07   | 0.48     | 0.47     | 0.49     | 0.55      | 0.00    | 0.28     | 0.28    | 0.49     | 0.86     | 0.86     | 0.61   | 0.62    | 0.47     |
| 2.1-Base                                        | 0.86   | 0.81   | 0.85    | 0.78   | 0.75   | 0.82   | 0.47     | 0.42     | 0.41     | 0.50      | 0.24    | 0.00     | 0.03    | 0.56     | 0.79     | 0.80     | 0.45   | 0.46    | 0.49     |
| 2.1-Art                                         | 0.87   | 0.82   | 0.87    | 0.77   | 0.75   | 0.82   | 0.47     | 0.41     | 0.40     | 0.50      | 0.24    | 0.03     | 0.00    | 0.55     | 0.81     | 0.82     | 0.46   | 0.46    | 0.49     |
| SD3-Real                                        | 0.79   | 0.80   | 0.78    | 0.99   | 0.91   | 0.96   | 0.50     | 0.52     | 0.59     | 0.59      | 0.38    | 0.51     | 0.49    | 0.00     | 0.53     | 0.51     | 0.67   | 0.69    | 0.61     |
| SD3-Base                                        | 0.53   | 0.66   | 0.54    | 0.72   | 0.71   | 0.67   | 0.57     | 0.53     | 0.60     | 0.57      | 0.51    | 0.55     | 0.55    | 0.40     | 0.00     | 0.00     | 0.52   | 0.59    | 0.66     |
| SD3-Anim                                        | 0.54   | 0.68   | 0.56    | 0.74   | 0.73   | 0.69   | 0.55     | 0.52     | 0.59     | 0.56      | 0.50    | 0.55     | 0.55    | 0.38     | 0.00     | 0.00     | 0.54   | 0.61    | 0.67     |
| XL-DPO                                          | 0.86   | 0.84   | 0.90    | 0.62   | 0.62   | 0.59   | 0.64     | 0.48     | 0.52     | 0.58      | 0.52    | 0.46     | 0.46    | 0.73     | 0.75     | 0.79     | 0.00   | 0.22    | 0.58     |
| XL-Base                                         | 0.82   | 0.77   | 0.85    | 0.59   | 0.57   | 0.64   | 0.65     | 0.53     | 0.54     | 0.63      | 0.50    | 0.44     | 0.43    | 0.72     | 0.81     | 0.85     | 0.21   | 0.00    | 0.52     |
| XL-Light                                        | 0.99   | 0.85   | 1.00    | 1.05   | 1.02   | 1.18   | 0.86     | 0.81     | 0.79     | 0.86      | 0.47    | 0.57     | 0.55    | 0.77     | 1.10     | 1.12     | 0.66   | 0.64    | 0.00     |

Table A43. Normalized Wasserstein Distance Matrix. Each column normalized by max distance to base models. ■ Short, ■ Medium-low, ■ Medium-high, ■ Long distance.

| Prompt: A Photo Of An Dangerous Bird In A Dimmed Studio |        |        |         |        |        |        |          |          |          |           |         |          |         |          |          |          |        |         |          |
|---------------------------------------------------------|--------|--------|---------|--------|--------|--------|----------|----------|----------|-----------|---------|----------|---------|----------|----------|----------|--------|---------|----------|
|                                                         | Flux   |        |         | Kand   |        |        | SD1.5    |          |          |           | SD2.1   |          |         | SD3      |          |          | SDXL   |         |          |
|                                                         | F-Base | F-LoRA | F-Turbo | K-Base | K-Naru | K-Poke | 1.5-v1.2 | 1.5-v1.4 | 1.5-Base | 1.5-Dream | 2.1-DPO | 2.1-Base | 2.1-Art | SD3-Real | SD3-Base | SD3-Anim | XL-DPO | XL-Base | XL-Light |
| F-Base                                                  | 0.00   | 0.23   | 0.20    | 0.47   | 0.46   | 1.00   | 0.97     | 0.85     | 0.89     | 0.73      | 0.94    | 0.91     | 0.92    | 0.68     | 0.56     | 0.56     | 0.70   | 0.74    | 0.51     |
| F-LoRA                                                  | 0.38   | 0.00   | 0.49    | 0.58   | 0.57   | 1.45   | 1.41     | 1.37     | 1.42     | 1.17      | 1.52    | 1.52     | 1.53    | 1.28     | 1.05     | 1.06     | 1.31   | 1.34    | 0.98     |
| F-Turbo                                                 | 0.18   | 0.26   | 0.00    | 0.45   | 0.43   | 0.91   | 0.92     | 0.79     | 0.82     | 0.70      | 0.84    | 0.82     | 0.84    | 0.62     | 0.52     | 0.52     | 0.62   | 0.68    | 0.46     |
| K-Base                                                  | 0.52   | 0.38   | 0.54    | 0.00   | 0.12   | 0.80   | 1.00     | 1.00     | 1.00     | 1.00      | 1.00    | 1.00     | 1.00    | 1.00     | 1.00     | 1.00     | 1.00   | 1.00    | 0.81     |
| K-Naru                                                  | 0.48   | 0.36   | 0.50    | 0.12   | 0.00   | 0.83   | 0.96     | 0.94     | 0.95     | 0.93      | 0.94    | 0.96     | 0.96    | 0.91     | 0.88     | 0.88     | 0.92   | 0.91    | 0.75     |
| K-Poke                                                  | 1.03   | 0.89   | 1.03    | 0.75   | 0.81   | 0.00   | 0.82     | 0.54     | 0.70     | 0.87      | 0.54    | 0.56     | 0.56    | 0.91     | 1.14     | 1.14     | 0.97   | 1.10    | 1.09     |
| 1.5-v1.2                                                | 1.07   | 0.93   | 1.12    | 1.00   | 1.01   | 0.88   | 0.00     | 0.49     | 0.42     | 0.61      | 0.68    | 0.63     | 0.63    | 0.89     | 1.22     | 1.23     | 1.24   | 1.20    | 1.28     |
| 1.5-v1.4                                                | 1.14   | 1.09   | 1.17    | 1.21   | 1.19   | 0.70   | 0.59     | 0.00     | 0.38     | 0.63      | 0.46    | 0.41     | 0.41    | 0.59     | 1.09     | 1.11     | 0.90   | 0.95    | 1.14     |
| 1.5-Base                                                | 0.95   | 0.91   | 0.97    | 0.97   | 0.96   | 0.73   | 0.41     | 0.30     | 0.00     | 0.51      | 0.50    | 0.46     | 0.45    | 0.63     | 0.95     | 0.96     | 0.90   | 0.91    | 1.00     |
| 1.5-Dream                                               | 0.65   | 0.62   | 0.69    | 0.81   | 0.79   | 0.76   | 0.49     | 0.42     | 0.42     | 0.00      | 0.60    | 0.55     | 0.55    | 0.54     | 0.75     | 0.75     | 0.72   | 0.72    | 0.70     |
| 2.1-DPO                                                 | 1.08   | 1.05   | 1.06    | 1.05   | 1.02   | 0.61   | 0.71     | 0.39     | 0.54     | 0.78      | 0.00    | 0.29     | 0.28    | 0.65     | 0.96     | 0.97     | 0.82   | 0.91    | 1.10     |
| 2.1-Base                                                | 1.00   | 1.00   | 1.00    | 1.00   | 1.00   | 0.60   | 0.63     | 0.34     | 0.47     | 0.67      | 0.28    | 0.00     | 0.02    | 0.55     | 0.93     | 0.94     | 0.75   | 0.82    | 1.00     |
| 2.1-Art                                                 | 1.02   | 1.02   | 1.03    | 1.01   | 1.01   | 0.60   | 0.64     | 0.34     | 0.47     | 0.69      | 0.27    | 0.02     | 0.00    | 0.55     | 0.94     | 0.95     | 0.78   | 0.84    | 1.02     |
| SD3-Real                                                | 0.69   | 0.77   | 0.70    | 0.93   | 0.87   | 0.90   | 0.82     | 0.45     | 0.60     | 0.61      | 0.58    | 0.51     | 0.50    | 0.00     | 0.71     | 0.73     | 0.44   | 0.45    | 0.56     |
| SD3-Base                                                | 0.39   | 0.43   | 0.39    | 0.63   | 0.58   | 0.75   | 0.77     | 0.57     | 0.62     | 0.58      | 0.58    | 0.58     | 0.58    | 0.49     | 0.00     | 0.00     | 0.53   | 0.60    | 0.49     |
| SD3-Anim                                                | 0.39   | 0.43   | 0.39    | 0.62   | 0.57   | 0.74   | 0.76     | 0.57     | 0.62     | 0.58      | 0.58    | 0.58     | 0.58    | 0.49     | 0.00     | 0.00     | 0.53   | 0.60    | 0.48     |
| XL-DPO                                                  | 0.55   | 0.61   | 0.54    | 0.71   | 0.68   | 0.75   | 0.88     | 0.53     | 0.66     | 0.63      | 0.56    | 0.54     | 0.55    | 0.34     | 0.60     | 0.61     | 0.00   | 0.21    | 0.32     |
| XL-Base                                                 | 0.57   | 0.61   | 0.57    | 0.69   | 0.65   | 0.82   | 0.83     | 0.54     | 0.65     | 0.61      | 0.60    | 0.56     | 0.57    | 0.34     | 0.66     | 0.67     | 0.20   | 0.00    | 0.33     |
| XL-Light                                                | 0.37   | 0.42   | 0.37    | 0.53   | 0.51   | 0.76   | 0.84     | 0.61     | 0.67     | 0.56      | 0.69    | 0.65     | 0.66    | 0.40     | 0.50     | 0.51     | 0.29   | 0.31    | 0.00     |

Table A44. Normalized Wasserstein Distance Matrix. Each column normalized by max distance to base models. ■ Short, ■ Medium-low, ■ Medium-high, ■ Long distance.

|           | Prompt: A Photo Of An Dangerous Bird On A Grass |        |         |        |        |        |          |          |          |           |         |          |         |          |          |          |        |         |          |
|-----------|-------------------------------------------------|--------|---------|--------|--------|--------|----------|----------|----------|-----------|---------|----------|---------|----------|----------|----------|--------|---------|----------|
|           | Flux                                            |        |         | Kand   |        |        | SD1.5    |          |          |           | SD2.1   |          |         | SD3      |          |          | SDXL   |         |          |
|           | F-Base                                          | F-LoRA | F-Turbo | K-Base | K-Naru | K-Poke | 1.5-v1.2 | 1.5-v1.4 | 1.5-Base | 1.5-Dream | 2.1-DPO | 2.1-Base | 2.1-Art | SD3-Real | SD3-Base | SD3-Anim | XL-DPO | XL-Base | XL-Light |
| F-Base    | 0.00                                            | 0.45   | 0.32    | 0.88   | 0.91   | 0.96   | 0.93     | 0.92     | 0.93     | 1.00      | 0.97    | 1.00     | 1.00    | 0.60     | 0.55     | 0.54     | 0.60   | 0.56    | 0.68     |
| F-LoRA    | 0.41                                            | 0.00   | 0.51    | 0.81   | 0.87   | 1.04   | 0.94     | 0.93     | 0.87     | 0.98      | 0.99    | 0.99     | 0.99    | 0.76     | 0.71     | 0.71     | 0.70   | 0.65    | 0.76     |
| F-Turbo   | 0.27                                            | 0.47   | 0.00    | 0.75   | 0.78   | 0.83   | 0.83     | 0.85     | 0.85     | 0.90      | 0.85    | 0.87     | 0.87    | 0.56     | 0.49     | 0.49     | 0.58   | 0.58    | 0.66     |
| K-Base    | 1.00                                            | 1.00   | 1.00    | 0.00   | 0.21   | 0.41   | 1.00     | 1.00     | 1.00     | 0.97      | 0.80    | 0.87     | 0.86    | 1.00     | 1.00     | 1.00     | 1.00   | 1.00    | 1.00     |
| K-Naru    | 0.92                                            | 0.97   | 0.93    | 0.19   | 0.00   | 0.41   | 0.95     | 0.92     | 0.95     | 0.90      | 0.82    | 0.87     | 0.85    | 0.89     | 0.86     | 0.86     | 0.88   | 0.89    | 0.93     |
| K-Poke    | 1.13                                            | 1.34   | 1.15    | 0.42   | 0.48   | 0.00   | 1.19     | 1.24     | 1.29     | 1.20      | 0.83    | 0.95     | 0.93    | 0.99     | 0.99     | 0.99     | 1.00   | 1.03    | 0.92     |
| 1.5-v1.2  | 0.82                                            | 0.91   | 0.87    | 0.78   | 0.84   | 0.90   | 0.00     | 0.58     | 0.59     | 0.47      | 0.65    | 0.59     | 0.59    | 0.62     | 0.76     | 0.75     | 0.72   | 0.69    | 0.70     |
| 1.5-v1.4  | 0.79                                            | 0.87   | 0.86    | 0.76   | 0.79   | 0.91   | 0.56     | 0.00     | 0.46     | 0.49      | 0.82    | 0.75     | 0.73    | 0.62     | 0.68     | 0.68     | 0.72   | 0.71    | 0.81     |
| 1.5-Base  | 0.82                                            | 0.84   | 0.89    | 0.78   | 0.84   | 0.97   | 0.59     | 0.47     | 0.00     | 0.51      | 0.82    | 0.74     | 0.73    | 0.70     | 0.77     | 0.77     | 0.77   | 0.73    | 0.86     |
| 1.5-Dream | 1.02                                            | 1.09   | 1.08    | 0.87   | 0.91   | 1.04   | 0.54     | 0.57     | 0.58     | 0.00      | 0.86    | 0.78     | 0.77    | 0.69     | 0.84     | 0.83     | 0.90   | 0.86    | 0.95     |
| 2.1-DPO   | 0.90                                            | 1.02   | 0.94    | 0.66   | 0.76   | 0.67   | 0.68     | 0.90     | 0.87     | 0.79      | 0.00    | 0.29     | 0.30    | 0.81     | 0.86     | 0.86     | 0.85   | 0.83    | 0.76     |
| 2.1-Base  | 0.90                                            | 0.97   | 0.92    | 0.69   | 0.77   | 0.72   | 0.59     | 0.78     | 0.75     | 0.69      | 0.28    | 0.00     | 0.02    | 0.74     | 0.81     | 0.81     | 0.80   | 0.77    | 0.72     |
| 2.1-Art   | 0.90                                            | 0.98   | 0.92    | 0.68   | 0.76   | 0.71   | 0.60     | 0.77     | 0.74     | 0.69      | 0.29    | 0.02     | 0.00    | 0.75     | 0.81     | 0.81     | 0.80   | 0.78    | 0.74     |
| SD3-Real  | 0.65                                            | 0.90   | 0.72    | 0.96   | 0.95   | 0.91   | 0.76     | 0.78     | 0.85     | 0.74      | 0.94    | 0.90     | 0.91    | 0.00     | 0.32     | 0.32     | 0.39   | 0.39    | 0.49     |
| SD3-Base  | 0.58                                            | 0.83   | 0.61    | 0.94   | 0.91   | 0.90   | 0.91     | 0.85     | 0.93     | 0.89      | 0.98    | 0.96     | 0.96    | 0.32     | 0.00     | 0.00     | 0.42   | 0.43    | 0.58     |
| SD3-Anim  | 0.58                                            | 0.83   | 0.61    | 0.94   | 0.91   | 0.90   | 0.90     | 0.84     | 0.93     | 0.86      | 0.98    | 0.96     | 0.96    | 0.32     | 0.00     | 0.00     | 0.41   | 0.43    | 0.58     |
| XL-DPO    | 0.61                                            | 0.78   | 0.70    | 0.90   | 0.89   | 0.87   | 0.83     | 0.86     | 0.89     | 0.90      | 0.93    | 0.91     | 0.90    | 0.37     | 0.40     | 0.40     | 0.00   | 0.17    | 0.37     |
| XL-Base   | 0.64                                            | 0.80   | 0.78    | 1.00   | 1.00   | 1.00   | 0.88     | 0.94     | 0.93     | 0.96      | 1.00    | 0.98     | 0.98    | 0.41     | 0.46     | 0.46     | 0.18   | 0.00    | 0.39     |
| XL-Light  | 0.79                                            | 0.95   | 0.89    | 1.02   | 1.06   | 0.91   | 0.90     | 1.09     | 1.12     | 1.07      | 0.94    | 0.92     | 0.94    | 0.52     | 0.63     | 0.63     | 0.42   | 0.39    | 0.00     |

Table A45. Normalized Wasserstein Distance Matrix. Each column normalized by max distance to base models. ■ Short, ■ Medium-low, ■ Medium-high, ■ Long distance.

|           | Prompt: A Photo Of An Dangerous Bird On A Savana |        |         |        |        |        |          |          |          |           |         |          |         |          |          |          |        |         |          |
|-----------|--------------------------------------------------|--------|---------|--------|--------|--------|----------|----------|----------|-----------|---------|----------|---------|----------|----------|----------|--------|---------|----------|
|           | Flux                                             |        |         | Kand   |        |        | SD1.5    |          |          |           | SD2.1   |          |         | SD3      |          |          | SDXL   |         |          |
|           | F-Base                                           | F-LoRA | F-Turbo | K-Base | K-Naru | K-Poke | 1.5-v1.2 | 1.5-v1.4 | 1.5-Base | 1.5-Dream | 2.1-DPO | 2.1-Base | 2.1-Art | SD3-Real | SD3-Base | SD3-Anim | XL-DPO | XL-Base | XL-Light |
| F-Base    | 0.00                                             | 0.49   | 0.27    | 0.56   | 0.56   | 0.55   | 0.66     | 0.58     | 0.72     | 0.71      | 0.55    | 0.52     | 0.53    | 0.53     | 0.58     | 0.59     | 0.55   | 0.53    | 0.49     |
| F-LoRA    | 0.51                                             | 0.00   | 0.39    | 0.60   | 0.62   | 0.61   | 0.47     | 0.39     | 0.48     | 0.51      | 0.51    | 0.51     | 0.52    | 0.75     | 0.72     | 0.73     | 0.57   | 0.56    | 0.54     |
| F-Turbo   | 0.44                                             | 0.61   | 0.00    | 0.84   | 0.82   | 0.79   | 0.71     | 0.57     | 0.85     | 0.72      | 0.45    | 0.41     | 0.43    | 0.61     | 0.76     | 0.76     | 0.87   | 0.86    | 0.82     |
| K-Base    | 0.85                                             | 0.87   | 0.78    | 0.00   | 0.12   | 0.20   | 0.84     | 0.85     | 0.91     | 0.81      | 0.79    | 0.81     | 0.81    | 0.71     | 0.77     | 0.78     | 0.27   | 0.25    | 0.25     |
| K-Naru    | 0.81                                             | 0.86   | 0.73    | 0.11   | 0.00   | 0.20   | 0.84     | 0.84     | 0.91     | 0.83      | 0.77    | 0.76     | 0.77    | 0.64     | 0.69     | 0.70     | 0.28   | 0.25    | 0.25     |
| K-Poke    | 0.89                                             | 0.95   | 0.79    | 0.21   | 0.22   | 0.00   | 0.95     | 0.94     | 1.08     | 0.88      | 0.83    | 0.86     | 0.87    | 0.70     | 0.81     | 0.81     | 0.29   | 0.29    | 0.28     |
| 1.5-v1.2  | 0.85                                             | 0.58   | 0.57    | 0.71   | 0.75   | 0.75   | 0.00     | 0.34     | 0.47     | 0.38      | 0.45    | 0.44     | 0.45    | 0.96     | 0.94     | 0.95     | 0.69   | 0.68    | 0.70     |
| 1.5-v1.4  | 0.89                                             | 0.58   | 0.54    | 0.87   | 0.90   | 0.89   | 0.41     | 0.00     | 0.45     | 0.42      | 0.46    | 0.46     | 0.48    | 1.01     | 0.96     | 0.98     | 0.81   | 0.82    | 0.80     |
| 1.5-Base  | 0.83                                             | 0.53   | 0.61    | 0.70   | 0.73   | 0.77   | 0.42     | 0.33     | 0.00     | 0.44      | 0.54    | 0.52     | 0.53    | 1.00     | 0.85     | 0.86     | 0.61   | 0.61    | 0.62     |
| 1.5-Dream | 1.06                                             | 0.73   | 0.66    | 0.80   | 0.87   | 0.82   | 0.45     | 0.41     | 0.57     | 0.00      | 0.51    | 0.50     | 0.52    | 1.22     | 1.19     | 1.20     | 0.78   | 0.80    | 0.81     |
| 2.1-DPO   | 0.98                                             | 0.88   | 0.50    | 0.93   | 0.95   | 0.92   | 0.63     | 0.53     | 0.84     | 0.61      | 0.00    | 0.21     | 0.22    | 0.82     | 0.92     | 0.92     | 0.96   | 0.95    | 0.96     |
| 2.1-Base  | 0.97                                             | 0.91   | 0.48    | 1.00   | 1.00   | 1.00   | 0.64     | 0.57     | 0.85     | 0.63      | 0.22    | 0.00     | 0.02    | 0.85     | 1.00     | 1.00     | 1.00   | 1.00    | 1.00     |
| 2.1-Art   | 0.95                                             | 0.89   | 0.48    | 0.96   | 0.96   | 0.96   | 0.63     | 0.56     | 0.82     | 0.62      | 0.22    | 0.02     | 0.00    | 0.83     | 0.96     | 0.96     | 0.95   | 0.95    | 0.96     |
| SD3-Real  | 0.60                                             | 0.81   | 0.43    | 0.53   | 0.50   | 0.49   | 0.85     | 0.74     | 0.98     | 0.93      | 0.52    | 0.52     | 0.52    | 0.00     | 0.42     | 0.42     | 0.54   | 0.51    | 0.51     |
| SD3-Base  | 0.63                                             | 0.74   | 0.50    | 0.55   | 0.52   | 0.54   | 0.79     | 0.67     | 0.80     | 0.86      | 0.55    | 0.57     | 0.58    | 0.40     | 0.00     | 0.00     | 0.40   | 0.40    | 0.43     |
| SD3-Anim  | 0.63                                             | 0.74   | 0.50    | 0.55   | 0.52   | 0.54   | 0.79     | 0.68     | 0.80     | 0.85      | 0.55    | 0.57     | 0.57    | 0.39     | 0.00     | 0.00     | 0.41   | 0.41    | 0.43     |
| XL-DPO    | 1.05                                             | 1.03   | 1.02    | 0.34   | 0.36   | 0.34   | 1.02     | 1.00     | 1.00     | 0.99      | 1.01    | 1.01     | 1.01    | 0.90     | 0.70     | 0.72     | 0.00   | 0.09    | 0.18     |
| XL-Base   | 1.00                                             | 1.00   | 1.00    | 0.31   | 0.33   | 0.34   | 1.00     | 1.00     | 1.00     | 1.00      | 1.00    | 1.00     | 1.00    | 0.85     | 0.70     | 0.72     | 0.09   | 0.00    | 0.18     |
| XL-Light  | 0.82                                             | 0.85   | 0.84    | 0.28   | 0.29   | 0.29   | 0.89     | 0.86     | 0.89     | 0.90      | 0.88    | 0.88     | 0.88    | 0.74     | 0.66     | 0.67     | 0.16   | 0.16    | 0.00     |

Table A46. Normalized Wasserstein Distance Matrix. Each column normalized by max distance to base models. ■ Short, ■ Medium-low, ■ Medium-high, ■ Long distance.

|           |  | Prompt: A Photo Of An Flightless Bird In A Dimmed Studio |        |         |        |        |        |          |          |          |           |         |          |         |          |          |          |        |         |          |
|-----------|--|----------------------------------------------------------|--------|---------|--------|--------|--------|----------|----------|----------|-----------|---------|----------|---------|----------|----------|----------|--------|---------|----------|
|           |  | Flux                                                     |        |         | Kand   |        |        | SD1.5    |          |          |           | SD2.1   |          |         | SD3      |          |          | SDXL   |         |          |
|           |  | F-Base                                                   | F-LoRA | F-Turbo | K-Base | K-Naru | K-Poke | 1.5-v1.2 | 1.5-v1.4 | 1.5-Base | 1.5-Dream | 2.1-DPO | 2.1-Base | 2.1-Art | SD3-Real | SD3-Base | SD3-Anim | XL-DPO | XL-Base | XL-Light |
| F-Base    |  | 0.00                                                     | 0.59   | 0.17    | 0.86   | 0.87   | 0.81   | 0.43     | 0.42     | 0.68     | 0.44      | 0.45    | 0.39     | 0.39    | 0.62     | 0.81     | 0.81     | 0.84   | 0.84    | 0.80     |
| F-LoRA    |  | 0.36                                                     | 0.00   | 0.38    | 0.53   | 0.51   | 0.56   | 0.44     | 0.48     | 0.53     | 0.43      | 0.51    | 0.48     | 0.48    | 0.73     | 0.85     | 0.87     | 0.71   | 0.68    | 0.61     |
| F-Turbo   |  | 0.26                                                     | 0.90   | 0.00    | 1.26   | 1.29   | 1.24   | 0.54     | 0.52     | 0.94     | 0.72      | 0.37    | 0.36     | 0.36    | 1.11     | 1.36     | 1.36     | 1.37   | 1.37    | 1.33     |
| K-Base    |  | 1.00                                                     | 1.00   | 1.00    | 0.00   | 0.12   | 0.19   | 1.00     | 1.00     | 1.00     | 1.00      | 1.00    | 1.00     | 1.00    | 0.85     | 0.93     | 0.96     | 0.56   | 0.59    | 0.53     |
| K-Naru    |  | 0.88                                                     | 0.83   | 0.89    | 0.11   | 0.00   | 0.21   | 0.87     | 0.86     | 0.85     | 0.83      | 0.88    | 0.87     | 0.86    | 0.78     | 0.85     | 0.87     | 0.52   | 0.53    | 0.48     |
| K-Poke    |  | 1.15                                                     | 1.28   | 1.20    | 0.23   | 0.29   | 0.00   | 1.17     | 1.19     | 1.19     | 1.05      | 1.27    | 1.22     | 1.23    | 0.86     | 0.83     | 0.86     | 0.55   | 0.58    | 0.60     |
| 1.5-v1.2  |  | 0.50                                                     | 0.83   | 0.43    | 1.00   | 1.00   | 0.96   | 0.00     | 0.28     | 0.39     | 0.58      | 0.50    | 0.46     | 0.47    | 0.94     | 1.16     | 1.16     | 1.01   | 0.99    | 1.04     |
| 1.5-v1.4  |  | 0.45                                                     | 0.82   | 0.38    | 0.92   | 0.91   | 0.90   | 0.26     | 0.00     | 0.39     | 0.53      | 0.35    | 0.34     | 0.34    | 0.87     | 1.01     | 1.02     | 0.91   | 0.89    | 0.94     |
| 1.5-Base  |  | 0.57                                                     | 0.72   | 0.54    | 0.72   | 0.71   | 0.71   | 0.28     | 0.31     | 0.00     | 0.54      | 0.57    | 0.54     | 0.54    | 0.79     | 0.97     | 0.98     | 0.81   | 0.79    | 0.77     |
| 1.5-Dream |  | 0.34                                                     | 0.54   | 0.38    | 0.67   | 0.64   | 0.58   | 0.39     | 0.38     | 0.50     | 0.00      | 0.51    | 0.45     | 0.45    | 0.58     | 0.59     | 0.60     | 0.60   | 0.58    | 0.57     |
| 2.1-DPO   |  | 0.54                                                     | 0.98   | 0.30    | 1.02   | 1.04   | 1.07   | 0.51     | 0.39     | 0.80     | 0.78      | 0.00    | 0.17     | 0.18    | 1.12     | 1.16     | 1.15     | 1.06   | 1.09    | 1.06     |
| 2.1-Base  |  | 0.45                                                     | 0.91   | 0.28    | 1.00   | 1.00   | 1.00   | 0.46     | 0.37     | 0.75     | 0.67      | 0.17    | 0.00     | 0.02    | 1.00     | 1.00     | 1.00     | 1.00   | 1.00    | 1.00     |
| 2.1-Art   |  | 0.44                                                     | 0.88   | 0.28    | 0.97   | 0.97   | 0.98   | 0.45     | 0.36     | 0.72     | 0.66      | 0.17    | 0.02     | 0.00    | 0.97     | 0.98     | 0.98     | 0.98   | 0.98    | 0.98     |
| SD3-Real  |  | 0.46                                                     | 0.88   | 0.57    | 0.55   | 0.57   | 0.45   | 0.60     | 0.61     | 0.70     | 0.56      | 0.70    | 0.64     | 0.64    | 0.00     | 0.46     | 0.47     | 0.45   | 0.43    | 0.49     |
| SD3-Base  |  | 0.52                                                     | 0.89   | 0.59    | 0.52   | 0.54   | 0.37   | 0.64     | 0.61     | 0.74     | 0.49      | 0.63    | 0.55     | 0.56    | 0.40     | 0.00     | 0.00     | 0.33   | 0.36    | 0.40     |
| SD3-Anim  |  | 0.51                                                     | 0.89   | 0.59    | 0.52   | 0.55   | 0.38   | 0.63     | 0.60     | 0.74     | 0.49      | 0.61    | 0.54     | 0.55    | 0.40     | 0.00     | 0.00     | 0.34   | 0.36    | 0.40     |
| XL-DPO    |  | 0.65                                                     | 0.89   | 0.72    | 0.37   | 0.40   | 0.30   | 0.67     | 0.65     | 0.74     | 0.60      | 0.69    | 0.66     | 0.67    | 0.46     | 0.40     | 0.41     | 0.00   | 0.13    | 0.22     |
| XL-Base   |  | 0.62                                                     | 0.81   | 0.69    | 0.37   | 0.38   | 0.30   | 0.63     | 0.62     | 0.69     | 0.55      | 0.68    | 0.63     | 0.64    | 0.42     | 0.41     | 0.42     | 0.13   | 0.00    | 0.24     |
| XL-Light  |  | 0.55                                                     | 0.69   | 0.63    | 0.32   | 0.33   | 0.29   | 0.62     | 0.61     | 0.63     | 0.51      | 0.62    | 0.60     | 0.60    | 0.46     | 0.43     | 0.44     | 0.19   | 0.23    | 0.00     |

Table A47. Normalized Wasserstein Distance Matrix. Each column normalized by max distance to base models. ■ Short, ■ Medium-low, ■ Medium-high, ■ Long distance.

|           |  | Prompt: A Photo Of An Flightless Bird On A Grass |        |         |        |        |        |          |          |          |           |         |          |         |          |          |          |        |         |          |
|-----------|--|--------------------------------------------------|--------|---------|--------|--------|--------|----------|----------|----------|-----------|---------|----------|---------|----------|----------|----------|--------|---------|----------|
|           |  | Flux                                             |        |         | Kand   |        |        | SD1.5    |          |          |           | SD2.1   |          |         | SD3      |          |          | SDXL   |         |          |
|           |  | F-Base                                           | F-LoRA | F-Turbo | K-Base | K-Naru | K-Poke | 1.5-v1.2 | 1.5-v1.4 | 1.5-Base | 1.5-Dream | 2.1-DPO | 2.1-Base | 2.1-Art | SD3-Real | SD3-Base | SD3-Anim | XL-DPO | XL-Base | XL-Light |
| F-Base    |  | 0.00                                             | 0.22   | 0.18    | 0.86   | 0.87   | 0.86   | 0.49     | 0.53     | 0.56     | 0.58      | 0.38    | 0.40     | 0.40    | 0.83     | 0.85     | 0.86     | 0.92   | 0.91    | 0.87     |
| F-LoRA    |  | 0.34                                             | 0.00   | 0.20    | 1.14   | 1.19   | 1.15   | 0.69     | 0.78     | 0.81     | 0.88      | 0.52    | 0.55     | 0.55    | 1.35     | 1.25     | 1.27     | 1.45   | 1.41    | 1.32     |
| F-Turbo   |  | 0.26                                             | 0.18   | 0.00    | 1.05   | 1.10   | 1.05   | 0.63     | 0.69     | 0.74     | 0.78      | 0.43    | 0.45     | 0.45    | 1.15     | 1.14     | 1.14     | 1.29   | 1.27    | 1.21     |
| K-Base    |  | 0.85                                             | 0.74   | 0.75    | 0.00   | 0.11   | 0.25   | 1.00     | 1.00     | 1.00     | 1.00      | 0.90    | 0.91     | 0.90    | 0.97     | 0.72     | 0.77     | 0.62   | 0.58    | 0.59     |
| K-Naru    |  | 0.96                                             | 0.85   | 0.86    | 0.12   | 0.00   | 0.23   | 1.06     | 1.06     | 1.06     | 1.04      | 1.00    | 1.00     | 1.00    | 1.02     | 0.81     | 0.85     | 0.54   | 0.49    | 0.57     |
| K-Poke    |  | 1.44                                             | 1.24   | 1.26    | 0.42   | 0.35   | 0.00   | 1.56     | 1.65     | 1.64     | 1.46      | 1.55    | 1.52     | 1.53    | 1.51     | 1.28     | 1.37     | 0.78   | 0.67    | 0.84     |
| 1.5-v1.2  |  | 0.52                                             | 0.48   | 0.48    | 1.07   | 1.03   | 1.00   | 0.00     | 0.33     | 0.34     | 0.32      | 0.44    | 0.45     | 0.45    | 0.82     | 1.02     | 1.03     | 0.83   | 0.81    | 0.85     |
| 1.5-v1.4  |  | 0.46                                             | 0.44   | 0.43    | 0.87   | 0.84   | 0.86   | 0.27     | 0.00     | 0.28     | 0.32      | 0.42    | 0.42     | 0.41    | 0.62     | 0.79     | 0.80     | 0.69   | 0.68    | 0.68     |
| 1.5-Base  |  | 0.49                                             | 0.46   | 0.46    | 0.88   | 0.85   | 0.87   | 0.28     | 0.29     | 0.00     | 0.31      | 0.45    | 0.46     | 0.46    | 0.69     | 0.84     | 0.85     | 0.68   | 0.67    | 0.69     |
| 1.5-Dream |  | 0.55                                             | 0.54   | 0.54    | 0.96   | 0.91   | 0.84   | 0.29     | 0.35     | 0.34     | 0.00      | 0.50    | 0.51     | 0.51    | 0.56     | 0.84     | 0.85     | 0.60   | 0.59    | 0.59     |
| 2.1-DPO   |  | 0.41                                             | 0.37   | 0.34    | 1.00   | 1.00   | 1.02   | 0.45     | 0.53     | 0.56     | 0.58      | 0.00    | 0.16     | 0.16    | 0.99     | 1.00     | 0.99     | 0.99   | 1.00    | 1.02     |
| 2.1-Base  |  | 0.44                                             | 0.39   | 0.35    | 1.00   | 1.00   | 1.00   | 0.46     | 0.53     | 0.57     | 0.58      | 0.15    | 0.00     | 0.01    | 1.00     | 1.00     | 1.00     | 1.00   | 1.00    | 1.00     |
| 2.1-Art   |  | 0.44                                             | 0.39   | 0.35    | 0.99   | 0.99   | 0.99   | 0.46     | 0.51     | 0.57     | 0.57      | 0.16    | 0.01     | 0.00    | 0.98     | 0.99     | 0.99     | 0.99   | 0.99    | 0.99     |
| SD3-Real  |  | 0.50                                             | 0.53   | 0.50    | 0.59   | 0.56   | 0.54   | 0.46     | 0.43     | 0.47     | 0.35      | 0.55    | 0.55     | 0.55    | 0.00     | 0.40     | 0.40     | 0.39   | 0.41    | 0.40     |
| SD3-Base  |  | 0.53                                             | 0.51   | 0.51    | 0.46   | 0.46   | 0.48   | 0.60     | 0.57     | 0.60     | 0.55      | 0.57    | 0.57     | 0.57    | 0.42     | 0.00     | 0.00     | 0.50   | 0.50    | 0.46     |
| SD3-Anim  |  | 0.52                                             | 0.50   | 0.50    | 0.47   | 0.47   | 0.50   | 0.58     | 0.55     | 0.58     | 0.54      | 0.55    | 0.55     | 0.55    | 0.40     | 0.00     | 0.00     | 0.50   | 0.50    | 0.46     |
| XL-DPO    |  | 0.90                                             | 0.92   | 0.91    | 0.60   | 0.48   | 0.46   | 0.76     | 0.77     | 0.76     | 0.61      | 0.88    | 0.89     | 0.89    | 0.64     | 0.77     | 0.81     | 0.00   | 0.09    | 0.28     |
| XL-Base   |  | 1.00                                             | 1.00   | 1.00    | 0.64   | 0.49   | 0.44   | 0.84     | 0.86     | 0.84     | 0.68      | 1.00    | 1.00     | 1.00    | 0.74     | 0.87     | 0.91     | 0.10   | 0.00    | 0.32     |
| XL-Light  |  | 0.78                                             | 0.77   | 0.79    | 0.53   | 0.47   | 0.46   | 0.72     | 0.71     | 0.71     | 0.56      | 0.83    | 0.82     | 0.82    | 0.59     | 0.66     | 0.69     | 0.26   | 0.26    | 0.00     |

Table A48. Normalized Wasserstein Distance Matrix. Each column normalized by max distance to base models. ■ Short, ■ Medium-low, ■ Medium-high, ■ Long distance.

| Prompt: A Photo Of An Flightless Bird On A Savana |        |        |         |        |        |        |          |          |          |           |         |          |         |          |          |          |        |         |          |
|---------------------------------------------------|--------|--------|---------|--------|--------|--------|----------|----------|----------|-----------|---------|----------|---------|----------|----------|----------|--------|---------|----------|
|                                                   | Flux   |        |         | Kand   |        |        | SD1.5    |          |          |           | SD2.1   |          |         | SD3      |          |          | SDXL   |         |          |
|                                                   | F-Base | F-LoRA | F-Turbo | K-Base | K-Naru | K-Poke | 1.5-v1.2 | 1.5-v1.4 | 1.5-Base | 1.5-Dream | 2.1-DPO | 2.1-Base | 2.1-Art | SD3-Real | SD3-Base | SD3-Anim | XL-DPO | XL-Base | XL-Light |
| F-Base                                            | 0.00   | 0.38   | 0.28    | 0.39   | 0.39   | 0.38   | 0.53     | 0.50     | 0.45     | 0.40      | 0.55    | 0.54     | 0.54    | 0.42     | 0.46     | 0.46     | 0.37   | 0.37    | 0.31     |
| F-LoRA                                            | 0.38   | 0.00   | 0.40    | 0.53   | 0.57   | 0.52   | 0.62     | 0.58     | 0.55     | 0.52      | 0.58    | 0.54     | 0.54    | 0.68     | 0.68     | 0.69     | 0.60   | 0.60    | 0.49     |
| F-Turbo                                           | 0.28   | 0.40   | 0.00    | 0.54   | 0.54   | 0.52   | 0.56     | 0.56     | 0.53     | 0.49      | 0.48    | 0.46     | 0.46    | 0.51     | 0.54     | 0.55     | 0.52   | 0.51    | 0.43     |
| K-Base                                            | 0.72   | 0.98   | 1.00    | 0.00   | 0.08   | 0.15   | 0.96     | 0.74     | 0.77     | 0.50      | 1.00    | 1.00     | 1.00    | 0.61     | 0.48     | 0.49     | 0.29   | 0.30    | 0.29     |
| K-Naru                                            | 0.70   | 1.01   | 0.97    | 0.08   | 0.00   | 0.15   | 0.93     | 0.74     | 0.74     | 0.49      | 0.96    | 0.97     | 0.97    | 0.53     | 0.44     | 0.44     | 0.26   | 0.26    | 0.26     |
| K-Poke                                            | 0.71   | 0.96   | 0.97    | 0.15   | 0.16   | 0.00   | 0.94     | 0.77     | 0.80     | 0.43      | 1.01    | 1.01     | 1.01    | 0.58     | 0.47     | 0.48     | 0.28   | 0.30    | 0.26     |
| 1.5-v1.2                                          | 0.50   | 0.59   | 0.54    | 0.50   | 0.49   | 0.49   | 0.00     | 0.36     | 0.37     | 0.31      | 0.55    | 0.52     | 0.51    | 0.52     | 0.61     | 0.62     | 0.45   | 0.43    | 0.41     |
| 1.5-v1.4                                          | 0.49   | 0.58   | 0.56    | 0.40   | 0.41   | 0.41   | 0.37     | 0.00     | 0.34     | 0.33      | 0.55    | 0.54     | 0.54    | 0.54     | 0.53     | 0.54     | 0.41   | 0.40    | 0.38     |
| 1.5-Base                                          | 0.43   | 0.52   | 0.51    | 0.40   | 0.40   | 0.41   | 0.37     | 0.32     | 0.00     | 0.32      | 0.54    | 0.52     | 0.51    | 0.48     | 0.48     | 0.48     | 0.38   | 0.37    | 0.35     |
| 1.5-Dream                                         | 0.51   | 0.66   | 0.63    | 0.34   | 0.35   | 0.29   | 0.41     | 0.42     | 0.42     | 0.00      | 0.72    | 0.69     | 0.69    | 0.46     | 0.48     | 0.49     | 0.32   | 0.30    | 0.26     |
| 2.1-DPO                                           | 0.88   | 0.93   | 0.78    | 0.88   | 0.87   | 0.88   | 0.94     | 0.90     | 0.91     | 0.92      | 0.00    | 0.17     | 0.17    | 0.85     | 0.83     | 0.83     | 0.86   | 0.86    | 0.88     |
| 2.1-Base                                          | 1.00   | 1.00   | 0.86    | 1.00   | 1.00   | 1.00   | 1.00     | 1.00     | 1.00     | 1.00      | 0.19    | 0.00     | 0.01    | 1.00     | 1.00     | 1.00     | 1.00   | 1.00    | 1.00     |
| 2.1-Art                                           | 1.00   | 1.00   | 0.86    | 1.01   | 1.01   | 1.01   | 0.99     | 1.00     | 0.99     | 1.00      | 0.19    | 0.01     | 0.00    | 1.00     | 1.00     | 1.00     | 1.00   | 1.00    | 1.00     |
| SD3-Real                                          | 0.46   | 0.73   | 0.55    | 0.35   | 0.32   | 0.34   | 0.59     | 0.59     | 0.54     | 0.39      | 0.57    | 0.58     | 0.58    | 0.00     | 0.34     | 0.35     | 0.29   | 0.29    | 0.27     |
| SD3-Base                                          | 0.48   | 0.71   | 0.58    | 0.27   | 0.25   | 0.26   | 0.67     | 0.56     | 0.52     | 0.40      | 0.54    | 0.57     | 0.57    | 0.33     | 0.00     | 0.00     | 0.23   | 0.25    | 0.25     |
| SD3-Anim                                          | 0.48   | 0.71   | 0.57    | 0.28   | 0.26   | 0.27   | 0.67     | 0.57     | 0.52     | 0.40      | 0.53    | 0.56     | 0.56    | 0.33     | 0.00     | 0.00     | 0.23   | 0.25    | 0.25     |
| XL-DPO                                            | 0.53   | 0.85   | 0.74    | 0.22   | 0.20   | 0.21   | 0.67     | 0.58     | 0.56     | 0.35      | 0.76    | 0.77     | 0.76    | 0.37     | 0.31     | 0.31     | 0.00   | 0.05    | 0.16     |
| XL-Base                                           | 0.53   | 0.86   | 0.74    | 0.23   | 0.21   | 0.23   | 0.66     | 0.58     | 0.55     | 0.34      | 0.77    | 0.78     | 0.78    | 0.39     | 0.34     | 0.35     | 0.05   | 0.00    | 0.16     |
| XL-Light                                          | 0.47   | 0.75   | 0.67    | 0.24   | 0.22   | 0.21   | 0.65     | 0.59     | 0.55     | 0.31      | 0.82    | 0.82     | 0.82    | 0.38     | 0.36     | 0.37     | 0.17   | 0.17    | 0.00     |

Table A49. Normalized Wasserstein Distance Matrix. Each column normalized by max distance to base models. ■ Short, ■ Medium-low, ■ Medium-high, ■ Long distance.

| Prompt: A Photo Of An Peaceful Bird In A Dimmed Studio |        |        |         |        |        |        |          |          |          |           |         |          |         |          |          |          |        |         |          |
|--------------------------------------------------------|--------|--------|---------|--------|--------|--------|----------|----------|----------|-----------|---------|----------|---------|----------|----------|----------|--------|---------|----------|
|                                                        | Flux   |        |         | Kand   |        |        | SD1.5    |          |          |           | SD2.1   |          |         | SD3      |          |          | SDXL   |         |          |
|                                                        | F-Base | F-LoRA | F-Turbo | K-Base | K-Naru | K-Poke | 1.5-v1.2 | 1.5-v1.4 | 1.5-Base | 1.5-Dream | 2.1-DPO | 2.1-Base | 2.1-Art | SD3-Real | SD3-Base | SD3-Anim | XL-DPO | XL-Base | XL-Light |
| F-Base                                                 | 0.00   | 0.64   | 0.35    | 0.86   | 0.86   | 0.87   | 0.88     | 0.73     | 0.68     | 0.66      | 0.86    | 0.86     | 0.86    | 0.73     | 0.64     | 0.65     | 0.94   | 0.84    | 0.86     |
| F-LoRA                                                 | 0.68   | 0.00   | 0.63    | 0.67   | 0.72   | 0.80   | 0.94     | 0.86     | 0.83     | 0.69      | 0.96    | 0.94     | 0.96    | 0.75     | 0.86     | 0.87     | 0.66   | 0.59    | 0.62     |
| F-Turbo                                                | 0.39   | 0.65   | 0.00    | 0.75   | 0.76   | 0.82   | 0.91     | 0.76     | 0.67     | 0.83      | 0.81    | 0.86     | 0.86    | 0.84     | 0.62     | 0.62     | 0.94   | 0.92    | 0.90     |
| K-Base                                                 | 0.96   | 0.71   | 0.77    | 0.00   | 0.33   | 0.46   | 0.93     | 0.91     | 0.85     | 0.89      | 0.99    | 1.00     | 1.00    | 1.00     | 0.66     | 0.68     | 0.78   | 0.77    | 0.71     |
| K-Naru                                                 | 0.85   | 0.67   | 0.68    | 0.29   | 0.00   | 0.43   | 0.90     | 0.83     | 0.74     | 0.82      | 0.84    | 0.88     | 0.88    | 0.86     | 0.56     | 0.57     | 0.69   | 0.68    | 0.68     |
| K-Poke                                                 | 0.88   | 0.77   | 0.75    | 0.41   | 0.44   | 0.00   | 0.87     | 0.89     | 0.80     | 0.74      | 0.85    | 0.90     | 0.89    | 0.79     | 0.65     | 0.66     | 0.63   | 0.62    | 0.60     |
| 1.5-v1.2                                               | 1.09   | 1.11   | 1.03    | 1.03   | 1.13   | 1.07   | 0.00     | 0.76     | 0.73     | 0.83      | 1.14    | 0.97     | 0.97    | 1.09     | 0.88     | 0.90     | 1.22   | 1.05    | 0.96     |
| 1.5-v1.4                                               | 0.87   | 0.98   | 0.83    | 0.97   | 1.00   | 1.06   | 0.73     | 0.00     | 0.53     | 0.90      | 0.73    | 0.71     | 0.72    | 0.88     | 0.69     | 0.69     | 1.03   | 1.01    | 1.00     |
| 1.5-Base                                               | 0.75   | 0.88   | 0.68    | 0.83   | 0.83   | 0.88   | 0.65     | 0.49     | 0.00     | 0.76      | 0.74    | 0.71     | 0.71    | 0.89     | 0.57     | 0.57     | 0.96   | 0.93    | 0.92     |
| 1.5-Dream                                              | 0.74   | 0.74   | 0.85    | 0.89   | 0.93   | 0.83   | 0.75     | 0.85     | 0.78     | 0.00      | 1.11    | 1.00     | 0.98    | 0.62     | 0.84     | 0.85     | 0.59   | 0.48    | 0.54     |
| 2.1-DPO                                                | 0.91   | 0.97   | 0.78    | 0.93   | 0.91   | 0.90   | 0.97     | 0.65     | 0.71     | 1.04      | 0.00    | 0.38     | 0.38    | 0.76     | 0.60     | 0.59     | 0.90   | 0.89    | 0.86     |
| 2.1-Base                                               | 0.97   | 1.00   | 0.88    | 1.00   | 1.00   | 1.00   | 0.87     | 0.66     | 0.73     | 1.00      | 0.41    | 0.00     | 0.04    | 0.76     | 0.71     | 0.71     | 0.93   | 0.86    | 0.80     |
| 2.1-Art                                                | 0.96   | 1.03   | 0.88    | 1.00   | 1.00   | 0.99   | 0.87     | 0.67     | 0.72     | 0.97      | 0.41    | 0.04     | 0.00    | 0.76     | 0.70     | 0.70     | 0.92   | 0.85    | 0.79     |
| SD3-Real                                               | 0.88   | 0.85   | 0.92    | 1.06   | 1.05   | 0.94   | 1.04     | 0.88     | 0.96     | 0.66      | 0.86    | 0.81     | 0.81    | 0.00     | 0.95     | 0.95     | 0.61   | 0.54    | 0.54     |
| SD3-Base                                               | 0.77   | 0.97   | 0.68    | 0.70   | 0.67   | 0.77   | 0.84     | 0.69     | 0.61     | 0.89      | 0.67    | 0.75     | 0.74    | 0.95     | 0.00     | 0.00     | 1.00   | 1.00    | 1.00     |
| SD3-Anim                                               | 0.78   | 0.98   | 0.68    | 0.71   | 0.68   | 0.78   | 0.86     | 0.69     | 0.61     | 0.90      | 0.66    | 0.75     | 0.74    | 0.94     | 0.00     | 0.00     | 1.00   | 1.00    | 1.00     |
| XL-DPO                                                 | 0.92   | 0.61   | 0.84    | 0.68   | 0.68   | 0.62   | 0.96     | 0.84     | 0.85     | 0.51      | 0.83    | 0.81     | 0.80    | 0.50     | 0.82     | 0.82     | 0.00   | 0.21    | 0.28     |
| XL-Base                                                | 1.00   | 0.67   | 1.00    | 0.81   | 0.83   | 0.74   | 1.00     | 1.00     | 1.00     | 0.51      | 1.00    | 0.91     | 0.91    | 0.54     | 1.00     | 1.00     | 0.25   | 0.00    | 0.26     |
| XL-Light                                               | 1.44   | 0.99   | 1.38    | 1.07   | 1.16   | 1.00   | 1.29     | 1.41     | 1.40     | 0.81      | 1.36    | 1.20     | 1.19    | 0.76     | 1.41     | 1.42     | 0.49   | 0.36    | 0.00     |

Table A50. Normalized Wasserstein Distance Matrix. Each column normalized by max distance to base models. ■ Short, ■ Medium-low, ■ Medium-high, ■ Long distance.

|           |  | Prompt: A Photo Of An Peaceful Bird On A Grass |        |         |        |        |        |          |          |          |           |         |          |         |          |          |          |        |         |          |
|-----------|--|------------------------------------------------|--------|---------|--------|--------|--------|----------|----------|----------|-----------|---------|----------|---------|----------|----------|----------|--------|---------|----------|
|           |  | Flux                                           |        |         | Kand   |        |        | SD1.5    |          |          |           | SD2.1   |          |         | SD3      |          |          | SDXL   |         |          |
|           |  | F-Base                                         | F-LoRA | F-Turbo | K-Base | K-Naru | K-Poke | 1.5-v1.2 | 1.5-v1.4 | 1.5-Base | 1.5-Dream | 2.1-DPO | 2.1-Base | 2.1-Art | SD3-Real | SD3-Base | SD3-Anim | XL-DPO | XL-Base | XL-Light |
| F-Base    |  | 0.00                                           | 0.36   | 0.52    | 0.67   | 0.70   | 0.78   | 0.74     | 0.81     | 0.70     | 0.95      | 0.74    | 0.77     | 0.77    | 1.00     | 0.85     | 0.85     | 0.87   | 0.76    | 0.66     |
| F-LoRA    |  | 0.39                                           | 0.00   | 0.47    | 0.65   | 0.71   | 0.80   | 0.80     | 0.87     | 0.77     | 1.01      | 0.84    | 0.84     | 0.84    | 1.06     | 0.94     | 0.93     | 0.85   | 0.73    | 0.66     |
| F-Turbo   |  | 0.52                                           | 0.44   | 0.00    | 0.78   | 0.79   | 0.79   | 0.71     | 0.74     | 0.72     | 0.93      | 0.77    | 0.73     | 0.72    | 0.89     | 0.84     | 0.83     | 0.76   | 0.66    | 0.56     |
| K-Base    |  | 0.87                                           | 0.78   | 1.00    | 0.00   | 0.13   | 0.26   | 1.00     | 1.00     | 1.00     | 1.00      | 1.00    | 1.00     | 1.00    | 0.92     | 0.84     | 0.81     | 1.00   | 1.00    | 1.00     |
| K-Naru    |  | 0.92                                           | 0.86   | 1.02    | 0.13   | 0.00   | 0.22   | 0.96     | 0.95     | 1.00     | 0.97      | 1.01    | 1.01     | 1.00    | 0.86     | 0.78     | 0.75     | 0.96   | 0.98    | 0.98     |
| K-Poke    |  | 1.09                                           | 1.04   | 1.10    | 0.28   | 0.23   | 0.00   | 1.08     | 0.98     | 1.13     | 1.05      | 1.11    | 1.08     | 1.08    | 0.79     | 0.67     | 0.63     | 0.98   | 1.02    | 1.04     |
| 1.5-v1.2  |  | 0.98                                           | 0.97   | 0.93    | 1.01   | 0.97   | 1.01   | 0.00     | 0.45     | 0.52     | 0.47      | 0.61    | 0.53     | 0.53    | 0.75     | 0.96     | 0.96     | 0.71   | 0.63    | 0.57     |
| 1.5-v1.4  |  | 0.93                                           | 0.92   | 0.84    | 0.88   | 0.83   | 0.80   | 0.39     | 0.00     | 0.43     | 0.53      | 0.69    | 0.58     | 0.58    | 0.59     | 0.71     | 0.70     | 0.57   | 0.54    | 0.51     |
| 1.5-Base  |  | 0.79                                           | 0.79   | 0.80    | 0.87   | 0.86   | 0.90   | 0.45     | 0.42     | 0.00     | 0.66      | 0.66    | 0.55     | 0.55    | 0.84     | 0.89     | 0.90     | 0.73   | 0.63    | 0.57     |
| 1.5-Dream |  | 1.14                                           | 1.12   | 1.11    | 0.93   | 0.89   | 0.90   | 0.43     | 0.55     | 0.70     | 0.00      | 0.80    | 0.71     | 0.70    | 0.57     | 0.91     | 0.90     | 0.66   | 0.63    | 0.51     |
| 2.1-DPO   |  | 0.84                                           | 0.87   | 0.86    | 0.87   | 0.87   | 0.89   | 0.52     | 0.68     | 0.67     | 0.75      | 0.00    | 0.29     | 0.29    | 0.88     | 0.93     | 0.94     | 0.82   | 0.69    | 0.60     |
| 2.1-Base  |  | 1.00                                           | 1.00   | 0.94    | 1.00   | 1.00   | 1.00   | 0.53     | 0.66     | 0.63     | 0.77      | 0.33    | 0.00     | 0.01    | 0.92     | 1.00     | 1.00     | 0.84   | 0.74    | 0.60     |
| 2.1-Art   |  | 0.99                                           | 0.99   | 0.93    | 1.00   | 0.99   | 0.99   | 0.52     | 0.65     | 0.63     | 0.76      | 0.33    | 0.01     | 0.00    | 0.91     | 0.99     | 0.99     | 0.83   | 0.74    | 0.60     |
| SD3-Real  |  | 1.06                                           | 1.03   | 0.93    | 0.75   | 0.69   | 0.59   | 0.60     | 0.54     | 0.78     | 0.50      | 0.82    | 0.75     | 0.74    | 0.00     | 0.41     | 0.39     | 0.55   | 0.57    | 0.56     |
| SD3-Base  |  | 0.84                                           | 0.85   | 0.82    | 0.64   | 0.58   | 0.47   | 0.72     | 0.61     | 0.78     | 0.75      | 0.81    | 0.76     | 0.76    | 0.38     | 0.00     | 0.00     | 0.58   | 0.61    | 0.60     |
| SD3-Anim  |  | 0.86                                           | 0.86   | 0.83    | 0.63   | 0.57   | 0.45   | 0.73     | 0.62     | 0.80     | 0.76      | 0.83    | 0.78     | 0.77    | 0.38     | 0.00     | 0.00     | 0.58   | 0.62    | 0.62     |
| XL-DPO    |  | 0.80                                           | 0.72   | 0.69    | 0.71   | 0.68   | 0.64   | 0.50     | 0.46     | 0.60     | 0.51      | 0.67    | 0.60     | 0.60    | 0.48     | 0.54     | 0.54     | 0.00   | 0.18    | 0.39     |
| XL-Base   |  | 0.82                                           | 0.73   | 0.71    | 0.83   | 0.80   | 0.78   | 0.52     | 0.51     | 0.61     | 0.56      | 0.66    | 0.62     | 0.62    | 0.58     | 0.67     | 0.66     | 0.21   | 0.00    | 0.39     |
| XL-Light  |  | 0.85                                           | 0.79   | 0.72    | 1.01   | 0.98   | 0.97   | 0.56     | 0.58     | 0.66     | 0.55      | 0.69    | 0.60     | 0.60    | 0.69     | 0.80     | 0.81     | 0.55   | 0.47    | 0.00     |

Table A51. Normalized Wasserstein Distance Matrix. Each column normalized by max distance to base models. ■ Short, ■ Medium-low, ■ Medium-high, ■ Long distance.

|           |  | Prompt: A Photo Of An Peaceful Bird On A Savana |        |         |        |        |        |          |          |          |           |         |          |         |          |          |          |        |         |          |
|-----------|--|-------------------------------------------------|--------|---------|--------|--------|--------|----------|----------|----------|-----------|---------|----------|---------|----------|----------|----------|--------|---------|----------|
|           |  | Flux                                            |        |         | Kand   |        |        | SD1.5    |          |          |           | SD2.1   |          |         | SD3      |          |          | SDXL   |         |          |
|           |  | F-Base                                          | F-LoRA | F-Turbo | K-Base | K-Naru | K-Poke | 1.5-v1.2 | 1.5-v1.4 | 1.5-Base | 1.5-Dream | 2.1-DPO | 2.1-Base | 2.1-Art | SD3-Real | SD3-Base | SD3-Anim | XL-DPO | XL-Base | XL-Light |
| F-Base    |  | 0.00                                            | 0.40   | 0.27    | 0.37   | 0.37   | 0.32   | 0.83     | 0.84     | 0.92     | 0.90      | 0.82    | 0.82     | 0.81    | 0.73     | 0.80     | 0.80     | 0.30   | 0.30    | 0.37     |
| F-LoRA    |  | 0.37                                            | 0.00   | 0.45    | 0.45   | 0.46   | 0.51   | 0.78     | 0.78     | 0.79     | 0.78      | 0.96    | 0.89     | 0.88    | 0.91     | 0.90     | 0.89     | 0.36   | 0.35    | 0.37     |
| F-Turbo   |  | 0.25                                            | 0.45   | 0.00    | 0.40   | 0.38   | 0.40   | 0.78     | 0.76     | 0.84     | 0.92      | 0.76    | 0.72     | 0.70    | 0.63     | 0.72     | 0.71     | 0.38   | 0.36    | 0.43     |
| K-Base    |  | 0.37                                            | 0.48   | 0.44    | 0.00   | 0.14   | 0.28   | 0.90     | 0.89     | 0.90     | 1.00      | 0.86    | 0.88     | 0.88    | 0.89     | 0.98     | 0.97     | 0.32   | 0.31    | 0.34     |
| K-Naru    |  | 0.36                                            | 0.47   | 0.40    | 0.14   | 0.00   | 0.26   | 0.87     | 0.86     | 0.88     | 0.98      | 0.80    | 0.82     | 0.82    | 0.82     | 0.91     | 0.90     | 0.31   | 0.30    | 0.35     |
| K-Poke    |  | 0.37                                            | 0.63   | 0.51    | 0.32   | 0.31   | 0.00   | 1.03     | 1.07     | 1.06     | 1.07      | 0.94    | 0.98     | 0.97    | 0.96     | 1.02     | 1.02     | 0.29   | 0.27    | 0.30     |
| 1.5-v1.2  |  | 0.78                                            | 0.79   | 0.80    | 0.85   | 0.86   | 0.84   | 0.00     | 0.43     | 0.44     | 0.56      | 0.67    | 0.52     | 0.52    | 0.66     | 0.61     | 0.61     | 0.84   | 0.86    | 0.83     |
| 1.5-v1.4  |  | 0.93                                            | 0.91   | 0.91    | 0.98   | 0.98   | 1.02   | 0.50     | 0.00     | 0.38     | 0.66      | 0.65    | 0.48     | 0.48    | 0.59     | 0.57     | 0.57     | 1.01   | 1.01    | 0.97     |
| 1.5-Base  |  | 1.00                                            | 0.93   | 1.00    | 0.99   | 1.00   | 1.00   | 0.51     | 0.38     | 0.00     | 0.66      | 0.71    | 0.56     | 0.56    | 0.76     | 0.71     | 0.70     | 1.00   | 1.00    | 0.94     |
| 1.5-Dream |  | 0.75                                            | 0.69   | 0.83    | 0.84   | 0.85   | 0.77   | 0.50     | 0.50     | 0.50     | 0.00      | 0.77    | 0.64     | 0.64    | 0.80     | 0.69     | 0.69     | 0.74   | 0.74    | 0.72     |
| 2.1-DPO   |  | 0.73                                            | 0.91   | 0.74    | 0.77   | 0.75   | 0.73   | 0.64     | 0.52     | 0.58     | 0.83      | 0.00    | 0.26     | 0.26    | 0.54     | 0.60     | 0.60     | 0.83   | 0.82    | 0.81     |
| 2.1-Base  |  | 0.86                                            | 1.00   | 0.83    | 0.92   | 0.90   | 0.89   | 0.58     | 0.46     | 0.54     | 0.81      | 0.30    | 0.00     | 0.02    | 0.56     | 0.58     | 0.57     | 0.99   | 0.96    | 0.97     |
| 2.1-Art   |  | 0.85                                            | 0.99   | 0.81    | 0.92   | 0.89   | 0.88   | 0.58     | 0.46     | 0.54     | 0.81      | 0.30    | 0.02     | 0.00    | 0.55     | 0.56     | 0.56     | 0.98   | 0.96    | 0.96     |
| SD3-Real  |  | 0.77                                            | 1.02   | 0.72    | 0.93   | 0.89   | 0.87   | 0.73     | 0.56     | 0.73     | 1.01      | 0.63    | 0.56     | 0.54    | 0.00     | 0.37     | 0.36     | 0.99   | 0.96    | 1.03     |
| SD3-Base  |  | 0.81                                            | 0.98   | 0.80    | 1.00   | 0.96   | 0.90   | 0.66     | 0.53     | 0.66     | 0.84      | 0.68    | 0.56     | 0.55    | 0.36     | 0.00     | 0.00     | 0.98   | 0.93    | 1.00     |
| SD3-Anim  |  | 0.81                                            | 0.98   | 0.79    | 1.00   | 0.96   | 0.90   | 0.66     | 0.53     | 0.66     | 0.85      | 0.69    | 0.56     | 0.54    | 0.36     | 0.00     | 0.00     | 0.99   | 0.94    | 1.00     |
| XL-DPO    |  | 0.30                                            | 0.38   | 0.41    | 0.32   | 0.33   | 0.25   | 0.90     | 0.92     | 0.92     | 0.88      | 0.94    | 0.94     | 0.93    | 0.95     | 0.97     | 0.97     | 0.00   | 0.13    | 0.21     |
| XL-Base   |  | 0.33                                            | 0.41   | 0.43    | 0.34   | 0.34   | 0.26   | 1.00     | 1.00     | 1.00     | 0.97      | 1.00    | 1.00     | 1.00    | 1.00     | 1.00     | 1.00     | 0.14   | 0.00    | 0.25     |
| XL-Light  |  | 0.38                                            | 0.42   | 0.49    | 0.36   | 0.38   | 0.27   | 0.91     | 0.92     | 0.89     | 0.90      | 0.93    | 0.96     | 0.95    | 1.02     | 1.02     | 1.02     | 0.22   | 0.24    | 0.00     |

| Prompt: "A photo of a savory single fruit on a dish" |                                                                                     |                                                                                     |                                                                                     |                                                                                     |                                                                                     |                                                                                      |                                                                                       |                                                                                       |                                                                                       |                                                                                       |
|------------------------------------------------------|-------------------------------------------------------------------------------------|-------------------------------------------------------------------------------------|-------------------------------------------------------------------------------------|-------------------------------------------------------------------------------------|-------------------------------------------------------------------------------------|--------------------------------------------------------------------------------------|---------------------------------------------------------------------------------------|---------------------------------------------------------------------------------------|---------------------------------------------------------------------------------------|---------------------------------------------------------------------------------------|
| Model                                                | S1                                                                                  | S2                                                                                  | S3                                                                                  | S4                                                                                  | S5                                                                                  | S6                                                                                   | S7                                                                                    | S8                                                                                    | S9                                                                                    | S10                                                                                   |
| <i>Flux Family</i>                                   |                                                                                     |                                                                                     |                                                                                     |                                                                                     |                                                                                     |                                                                                      |                                                                                       |                                                                                       |                                                                                       |                                                                                       |
| Flux-Base                                            |    |    |    |    |    |    |    |    |    |    |
| Flux-LoRA                                            |    |    |    |    |    |    |    |    |    |    |
| Flux-Turbo-Alpha                                     |    |    |    |    |    |    |    |    |    |    |
| <i>Kandinsky Family</i>                              |                                                                                     |                                                                                     |                                                                                     |                                                                                     |                                                                                     |                                                                                      |                                                                                       |                                                                                       |                                                                                       |                                                                                       |
| Kandinsky-Base                                       |    |    |    |    |    |    |    |    |    |    |
| Kandinsky-Naruto                                     |   |   |   |   |   |   |   |   |   |   |
| Kandinsky-Pokemon                                    |  |  |  |  |  |  |  |  |  |  |
| <i>SD1.5 Family</i>                                  |                                                                                     |                                                                                     |                                                                                     |                                                                                     |                                                                                     |                                                                                      |                                                                                       |                                                                                       |                                                                                       |                                                                                       |
| SD1.5-Base                                           |  |  |  |  |  |  |  |  |  |  |
| SD1.5-1.2-Base                                       |  |  |  |  |  |  |  |  |  |  |
| SD1.5-1.4-Base                                       |  |  |  |  |  |  |  |  |  |  |
| SD1.5-DreamShaper                                    |  |  |  |  |  |  |  |  |  |  |

Figure B7. Qualitative results (Part 1): Flux, Kandinsky, and SD1.5 families.

| Prompt: "A photo of a savory single fruit on a dish" |    |    |    |    |    |    |    |    |    |     |
|------------------------------------------------------|----|----|----|----|----|----|----|----|----|-----|
| Model                                                | S1 | S2 | S3 | S4 | S5 | S6 | S7 | S8 | S9 | S10 |
| <i>SD2.1 Family</i>                                  |    |    |    |    |    |    |    |    |    |     |
| SD2.1-Base                                           |    |    |    |    |    |    |    |    |    |     |
| SD2.1-DPO                                            |    |    |    |    |    |    |    |    |    |     |
| SD2.1-LAION-Art                                      |    |    |    |    |    |    |    |    |    |     |
| <i>SD3 Family</i>                                    |    |    |    |    |    |    |    |    |    |     |
| SD3-Medium-Base                                      |    |    |    |    |    |    |    |    |    |     |
| SD3-Reality-Mix                                      |    |    |    |    |    |    |    |    |    |     |
| SD3-VAE-Anime                                        |    |    |    |    |    |    |    |    |    |     |
| <i>SDXL Family</i>                                   |    |    |    |    |    |    |    |    |    |     |
| SDXL-Base                                            |    |    |    |    |    |    |    |    |    |     |
| SDXL-DPO                                             |    |    |    |    |    |    |    |    |    |     |
| SDXL-Lightning-4Step                                 |    |    |    |    |    |    |    |    |    |     |

Figure B8. Qualitative results (Part 2): SD2.1, SD3, and SDXL families.

| Prompt: "A photo of a dangerous animal in a forest" |    |    |    |    |    |    |    |    |    |     |
|-----------------------------------------------------|----|----|----|----|----|----|----|----|----|-----|
| Model                                               | S1 | S2 | S3 | S4 | S5 | S6 | S7 | S8 | S9 | S10 |
| <i>Flux Family</i>                                  |    |    |    |    |    |    |    |    |    |     |
| Flux-Base                                           |    |    |    |    |    |    |    |    |    |     |
| Flux-LoRA                                           |    |    |    |    |    |    |    |    |    |     |
| Flux-Turbo-Alpha                                    |    |    |    |    |    |    |    |    |    |     |
| <i>Kandinsky Family</i>                             |    |    |    |    |    |    |    |    |    |     |
| Kandinsky-Base                                      |    |    |    |    |    |    |    |    |    |     |
| Kandinsky-Naruto                                    |    |    |    |    |    |    |    |    |    |     |
| Kandinsky-Pokemon                                   |    |    |    |    |    |    |    |    |    |     |
| <i>SD1.5 Family</i>                                 |    |    |    |    |    |    |    |    |    |     |
| SD1.5-Base                                          |    |    |    |    |    |    |    |    |    |     |
| SD1.5-1.2-Base                                      |    |    |    |    |    |    |    |    |    |     |
| SD1.5-1.4-Base                                      |    |    |    |    |    |    |    |    |    |     |
| SD1.5-DreamShaper                                   |    |    |    |    |    |    |    |    |    |     |

Figure B9. Qualitative results (Part 1): Flux, Kandinsky, and SD1.5 families.

| Model                | Prompt: "A photo of a dangerous animal in a forest" |    |    |    |    |    |    |    |    |     |
|----------------------|-----------------------------------------------------|----|----|----|----|----|----|----|----|-----|
|                      | S1                                                  | S2 | S3 | S4 | S5 | S6 | S7 | S8 | S9 | S10 |
| <i>SD2.1 Family</i>  |                                                     |    |    |    |    |    |    |    |    |     |
| SD2.1-Base           |                                                     |    |    |    |    |    |    |    |    |     |
| SD2.1-DPO            |                                                     |    |    |    |    |    |    |    |    |     |
| SD2.1-LAION-Art      |                                                     |    |    |    |    |    |    |    |    |     |
| <i>SD3 Family</i>    |                                                     |    |    |    |    |    |    |    |    |     |
| SD3-Medium-Base      |                                                     |    |    |    |    |    |    |    |    |     |
| SD3-Reality-Mix      |                                                     |    |    |    |    |    |    |    |    |     |
| SD3-VAE-Anime        |                                                     |    |    |    |    |    |    |    |    |     |
| <i>SDXL Family</i>   |                                                     |    |    |    |    |    |    |    |    |     |
| SDXL-Base            |                                                     |    |    |    |    |    |    |    |    |     |
| SDXL-DPO             |                                                     |    |    |    |    |    |    |    |    |     |
| SDXL-Lightning-4Step |                                                     |    |    |    |    |    |    |    |    |     |

Figure B10. Qualitative results (Part 2): SD2.1, SD3, and SDXL families.

| Prompt: "A photo of a dangerous animal in a grassland" |                                                                                     |                                                                                     |                                                                                     |                                                                                     |                                                                                     |                                                                                      |                                                                                       |                                                                                       |                                                                                       |                                                                                       |
|--------------------------------------------------------|-------------------------------------------------------------------------------------|-------------------------------------------------------------------------------------|-------------------------------------------------------------------------------------|-------------------------------------------------------------------------------------|-------------------------------------------------------------------------------------|--------------------------------------------------------------------------------------|---------------------------------------------------------------------------------------|---------------------------------------------------------------------------------------|---------------------------------------------------------------------------------------|---------------------------------------------------------------------------------------|
| Model                                                  | S1                                                                                  | S2                                                                                  | S3                                                                                  | S4                                                                                  | S5                                                                                  | S6                                                                                   | S7                                                                                    | S8                                                                                    | S9                                                                                    | S10                                                                                   |
| <i>Flux Family</i>                                     |                                                                                     |                                                                                     |                                                                                     |                                                                                     |                                                                                     |                                                                                      |                                                                                       |                                                                                       |                                                                                       |                                                                                       |
| Flux-Base                                              |    |    |    |    |    |    |    |    |    |    |
| Flux-LoRA                                              |    |    |    |    |    |    |    |    |    |    |
| Flux-Turbo-Alpha                                       |    |    |    |    |    |    |    |    |    |    |
| <i>Kandinsky Family</i>                                |                                                                                     |                                                                                     |                                                                                     |                                                                                     |                                                                                     |                                                                                      |                                                                                       |                                                                                       |                                                                                       |                                                                                       |
| Kandinsky-Base                                         |    |    |    |    |    |    |    |    |    |    |
| Kandinsky-Naruto                                       |   |   |   |   |   |   |   |   |   |   |
| Kandinsky-Pokemon                                      |  |  |  |  |  |  |  |  |  |  |
| <i>SD1.5 Family</i>                                    |                                                                                     |                                                                                     |                                                                                     |                                                                                     |                                                                                     |                                                                                      |                                                                                       |                                                                                       |                                                                                       |                                                                                       |
| SD1.5-Base                                             |  |  |  |  |  |  |  |  |  |  |
| SD1.5-1.2-Base                                         |  |  |  |  |  |  |  |  |  |  |
| SD1.5-1.4-Base                                         |  |  |  |  |  |  |  |  |  |  |
| SD1.5-DreamShaper                                      |  |  |  |  |  |  |  |  |  |  |

Figure B11. Qualitative results (Part 1): Flux, Kandinsky, and SD1.5 families.

| Model                | Prompt: "A photo of a dangerous animal in a grassland"                              |                                                                                     |                                                                                     |                                                                                     |                                                                                     |                                                                                      |                                                                                       |                                                                                       |                                                                                       |                                                                                       |
|----------------------|-------------------------------------------------------------------------------------|-------------------------------------------------------------------------------------|-------------------------------------------------------------------------------------|-------------------------------------------------------------------------------------|-------------------------------------------------------------------------------------|--------------------------------------------------------------------------------------|---------------------------------------------------------------------------------------|---------------------------------------------------------------------------------------|---------------------------------------------------------------------------------------|---------------------------------------------------------------------------------------|
|                      | S1                                                                                  | S2                                                                                  | S3                                                                                  | S4                                                                                  | S5                                                                                  | S6                                                                                   | S7                                                                                    | S8                                                                                    | S9                                                                                    | S10                                                                                   |
| <i>SD2.1 Family</i>  |                                                                                     |                                                                                     |                                                                                     |                                                                                     |                                                                                     |                                                                                      |                                                                                       |                                                                                       |                                                                                       |                                                                                       |
| SD2.1-Base           |    |    |    |    |    |    |    |    |    |    |
| SD2.1-DPO            |    |    |    |    |    |    |    |    |    |    |
| SD2.1-LAION-Art      |    |    |    |    |    |    |    |    |    |    |
| <i>SD3 Family</i>    |                                                                                     |                                                                                     |                                                                                     |                                                                                     |                                                                                     |                                                                                      |                                                                                       |                                                                                       |                                                                                       |                                                                                       |
| SD3-Medium-Base      |   |   |   |   |   |   |   |   |   |   |
| SD3-Reality-Mix      |  |  |  |  |  |  |  |  |  |  |
| SD3-VAE-Anime        |  |  |  |  |  |  |  |  |  |  |
| <i>SDXL Family</i>   |                                                                                     |                                                                                     |                                                                                     |                                                                                     |                                                                                     |                                                                                      |                                                                                       |                                                                                       |                                                                                       |                                                                                       |
| SDXL-Base            |  |  |  |  |  |  |  |  |  |  |
| SDXL-DPO             |  |  |  |  |  |  |  |  |  |  |
| SDXL-Lightning-4Step |  |  |  |  |  |  |  |  |  |  |

Figure B12. Qualitative results (Part 2): SD2.1, SD3, and SDXL families.

| Prompt: "A photo of a tropical single flower on a vase" |                                                                                     |                                                                                     |                                                                                     |                                                                                     |                                                                                      |                                                                                       |                                                                                       |                                                                                       |                                                                                       |                                                                                       |
|---------------------------------------------------------|-------------------------------------------------------------------------------------|-------------------------------------------------------------------------------------|-------------------------------------------------------------------------------------|-------------------------------------------------------------------------------------|--------------------------------------------------------------------------------------|---------------------------------------------------------------------------------------|---------------------------------------------------------------------------------------|---------------------------------------------------------------------------------------|---------------------------------------------------------------------------------------|---------------------------------------------------------------------------------------|
| Model                                                   | S1                                                                                  | S2                                                                                  | S3                                                                                  | S4                                                                                  | S5                                                                                   | S6                                                                                    | S7                                                                                    | S8                                                                                    | S9                                                                                    | S10                                                                                   |
| <i>Flux Family</i>                                      |                                                                                     |                                                                                     |                                                                                     |                                                                                     |                                                                                      |                                                                                       |                                                                                       |                                                                                       |                                                                                       |                                                                                       |
| Flux-Base                                               |    |    |    |    |    |    |    |    |    |    |
| Flux-LoRA                                               |    |    |    |    |    |    |    |    |    |    |
| Flux-Turbo-Alpha                                        |    |    |    |    |    |    |    |    |    |    |
| <i>Kandinsky Family</i>                                 |                                                                                     |                                                                                     |                                                                                     |                                                                                     |                                                                                      |                                                                                       |                                                                                       |                                                                                       |                                                                                       |                                                                                       |
| Kandinsky-Base                                          |    |    |    |    |    |    |    |    |    |    |
| Kandinsky-Naruto                                        |   |   |   |   |   |   |   |   |   |   |
| Kandinsky-Pokemon-LoRA                                  |  |  |  |  |  |  |  |  |  |  |
| <i>SD1.5 Family</i>                                     |                                                                                     |                                                                                     |                                                                                     |                                                                                     |                                                                                      |                                                                                       |                                                                                       |                                                                                       |                                                                                       |                                                                                       |
| SD1.5-Base                                              |  |  |  |  |  |  |  |  |  |  |
| SD1.5-1.2-Base                                          |  |  |  |  |  |  |  |  |  |  |
| SD1.5-1.4-Base                                          |  |  |  |  |  |  |  |  |  |  |
| SD1.5-DreamShaper                                       |  |  |  |  |  |  |  |  |  |  |

Figure B13. Qualitative results (Part 1): Flux, Kandinsky, and SD1.5 families.

| Model                | Prompt: "A photo of a tropical single flower on a vase"                             |                                                                                     |                                                                                     |                                                                                     |                                                                                     |                                                                                      |                                                                                       |                                                                                       |                                                                                       |                                                                                       |
|----------------------|-------------------------------------------------------------------------------------|-------------------------------------------------------------------------------------|-------------------------------------------------------------------------------------|-------------------------------------------------------------------------------------|-------------------------------------------------------------------------------------|--------------------------------------------------------------------------------------|---------------------------------------------------------------------------------------|---------------------------------------------------------------------------------------|---------------------------------------------------------------------------------------|---------------------------------------------------------------------------------------|
|                      | S1                                                                                  | S2                                                                                  | S3                                                                                  | S4                                                                                  | S5                                                                                  | S6                                                                                   | S7                                                                                    | S8                                                                                    | S9                                                                                    | S10                                                                                   |
| <i>SD2.1 Family</i>  |                                                                                     |                                                                                     |                                                                                     |                                                                                     |                                                                                     |                                                                                      |                                                                                       |                                                                                       |                                                                                       |                                                                                       |
| SD2.1-Base           |    |    |    |    |    |    |    |    |    |    |
| SD2.1-DPO            |    |    |    |    |    |    |    |    |    |    |
| SD2.1-LAION-Art      |    |    |    |    |    |    |    |    |    |    |
| <i>SD3 Family</i>    |                                                                                     |                                                                                     |                                                                                     |                                                                                     |                                                                                     |                                                                                      |                                                                                       |                                                                                       |                                                                                       |                                                                                       |
| SD3-Medium-Base      |   |   |   |   |   |   |   |   |   |   |
| SD3-Reality-Mix      |  |  |  |  |  |  |  |  |  |  |
| SD3-VAE-Anime        |  |  |  |  |  |  |  |  |  |  |
| <i>SDXL Family</i>   |                                                                                     |                                                                                     |                                                                                     |                                                                                     |                                                                                     |                                                                                      |                                                                                       |                                                                                       |                                                                                       |                                                                                       |
| SDXL-Base            |  |  |  |  |  |  |  |  |  |  |
| SDXL-DPO             |  |  |  |  |  |  |  |  |  |  |
| SDXL-Lightning-4Step |  |  |  |  |  |  |  |  |  |  |

Figure B14. Qualitative results (Part 2): SD2.1, SD3, and SDXL families.

### **G.3. Complete Prompt Enumeration**

#### **Baked Goods (9 prompts)**

1. A photo of a savory baked good on a dimmed studio.
2. A photo of a savory baked good on a dark wood surface.
3. A photo of a savory baked good against a brick wall.
4. A photo of a cheesy baked good on a dimmed studio.
5. A photo of a cheesy baked good on a dark wood surface.
6. A photo of a cheesy baked good against a brick wall.
7. A photo of a sweet baked good on a dimmed studio.
8. A photo of a sweet baked good on a dark wood surface.
9. A photo of a sweet baked good against a brick wall.

#### **Animals (9 prompts)**

1. A photo of a dangerous animal in a grassland.
2. A photo of a dangerous animal in a forest.
3. A photo of a dangerous animal in a dimmed studio.
4. A photo of a wild animal in a grassland.
5. A photo of a wild animal in a forest.
6. A photo of a wild animal in a dimmed studio.
7. A photo of a peaceful animal in a grassland.
8. A photo of a peaceful animal in a forest.
9. A photo of a peaceful animal in a dimmed studio.

#### **Flowers (6 prompts)**

1. A photo of a vibrant single flower on a pot.
2. A photo of a vibrant single flower in a dimmed studio.
3. A photo of a vibrant single flower on a vase.
4. A photo of a tropical single flower on a pot.
5. A photo of a tropical single flower in a dimmed studio.
6. A photo of a tropical single flower on a vase.

#### **Birds (9 prompts)**

1. A photo of an peaceful bird on a grass.
2. A photo of an peaceful bird on a savana.
3. A photo of an peaceful bird in a dimmed studio.
4. A photo of an dangerous bird on a grass.
5. A photo of an dangerous bird on a savana.
6. A photo of an dangerous bird in a dimmed studio.
7. A photo of an flightless bird on a grass.
8. A photo of an flightless bird on a savana.
9. A photo of an flightless bird in a dimmed studio.

#### **Fruits (9 prompts)**

1. A photo of a sweet single fruit on a dish.
2. A photo of a sweet single fruit on a wooden floor.
3. A photo of a sweet single fruit on a dimmed studio.
4. A photo of a frozen single fruit on a dish.
5. A photo of a frozen single fruit on a wooden floor.
6. A photo of a frozen single fruit on a dimmed studio.
7. A photo of a savory single fruit on a dish.
8. A photo of a savory single fruit on a wooden floor.
9. A photo of a savory single fruit on a dimmed studio.

## Acknowledgments

This work was supported by the Korean Government through the grants from IITP (RS-2021-II211343, RS-2022-II220320, RS-2025-25442338).

## References

- [1] Yossi Adi, Carsten Baum, Moustapha Cisse, Benny Pinkas, and Joseph Keshet. Turning your weakness into a strength: Watermarking deep neural networks by backdoor. In *27th USENIX security symposium (USENIX Security 18)*, pages 1615–1631, 2018. 2
- [2] Stability AI. Sdxl turbo. <https://huggingface.co/stabilityai/sdxl-turbo>, 2023. Accessed: 2025-11-12. 1
- [3] Xinyun Chen, Wenxiao Wang, Chris Bender, Yiming Ding, Ruoxi Jia, Bo Li, and Dawn Song. Refit: a unified watermark removal framework for deep learning systems with limited data. In *Proceedings of the 2021 ACM Asia Conference on Computer and Communications Security*, pages 321–335, 2021. 1
- [4] Yunzhuo Chen, Jordan Vice, Naveed Akhtar, Nur Al Hasan Haldar, and Ajmal Mian. Image watermarking of generative diffusion models. *arXiv preprint arXiv:2502.10465*, 2025. 1
- [5] Hai Ci, Yiren Song, Pei Yang, Jinheng Xie, and Mike Zheng Shou. Wmadapter: Adding watermark control to latent diffusion models. *arXiv preprint arXiv:2406.08337*, 2024. 2
- [6] Yingqian Cui, Jie Ren, Han Xu, Pengfei He, Hui Liu, Lichao Sun, Yue Xing, and Jiliang Tang. Diffusionshield: A watermark for copyright protection against generative diffusion models. *arXiv preprint arXiv:2306.04642*, 2023. 1, 2
- [7] Markus Egg. Semantic underspecification. *Language and Linguistics Compass*, 4(3):166–181, 2010. 5
- [8] Patrick Esser, Sumith Kulal, Andreas Blattmann, Rahim Entezari, Jonas Müller, Harry Saini, Yam Levi, Dominik Lorenz, Axel Sauer, Frederic Boesel, et al. Scaling rectified flow transformers for high-resolution image synthesis. In *ICML*, 2024. 1, 7
- [9] Pierre Fernandez, Guillaume Couairon, Hervé Jégou, Matthijs Douze, and Teddy Furon. The stable signature: Rooting watermarks in latent diffusion models. In *ICCV*, pages 22466–22477, 2023. 2
- [10] Steven Frisson. Semantic underspecification in language processing. *Language and linguistics compass*, 3(1): 111–127, 2009. 5
- [11] Rohit Gandikota, Hadas Orgad, Yonatan Belinkov, Joanna Materzyńska, and David Bau. Unified concept editing in diffusion models. *arXiv preprint arXiv:2308.14761*, 2023. 8
- [12] Kaiming He, Xiangyu Zhang, Shaoqing Ren, and Jian Sun. Deep residual learning for image recognition. In *Proceedings of the IEEE conference on computer vision and pattern recognition*, pages 770–778, 2016. 3
- [13] Edward J Hu, Yelong Shen, Phillip Wallis, Zeyuan Allen-Zhu, Yuanzhi Li, Shean Wang, Lu Wang, Weizhu Chen, et al. Lora: Low-rank adaptation of large language models. *ICLR*, 1(2):3, 2022. 2, 7, 1
- [14] Yuepeng Hu, Zhengyuan Jiang, Moyang Guo, and Neil Gong. Stable signature is unstable: Removing image watermark from diffusion models. *arXiv preprint arXiv:2405.07145*, 2024. 1, 2
- [15] Guang Hua and Andrew Beng Jin Teoh. Deep fidelity in dnn watermarking: A study of backdoor watermarking for classification models. *Pattern Recognition*, 144: 109844, 2023. 1
- [16] Huayang Huang, Yu Wu, and Qian Wang. Robin: Robust and invisible watermarks for diffusion models with adversarial optimization. *NeurIPS*, 37:3937–3963, 2024. 1, 2
- [17] Hengrui Jia, Christopher A Choquette-Choo, Varun Chandrasekaran, and Nicolas Papernot. Entangled watermarks as a defense against model extraction. In *30th USENIX security symposium (USENIX Security 21)*, pages 1937–1954, 2021. 2
- [18] Changhoon Kim, Kyle Min, Maitreya Patel, Sheng Cheng, and Yezhou Yang. Wouaf: Weight modulation for user attribution and fingerprinting in text-to-image diffusion models. In *CVPR*, pages 8974–8983, 2024. 2
- [19] John Kirchenbauer, Jonas Geiping, Yuxin Wen, Jonathan Katz, Ian Miers, and Tom Goldstein. A watermark for large language models. In *ICML*, pages 17061–17084. PMLR, 2023. 2
- [20] John Kirchenbauer, Jonas Geiping, Yuxin Wen, Manli Shu, Khalid Saifullah, Kezhi Kong, Kasun Fernando, Aniruddha Saha, Micah Goldblum, and Tom Goldstein. On the reliability of watermarks for large language models. *arXiv preprint arXiv:2306.04634*, 2023. 2
- [21] Simon Kornblith, Mohammad Norouzi, Honglak Lee, and Geoffrey Hinton. Similarity of neural network representations revisited. In *ICML*, pages 3519–3529. PMIR, 2019. 2
- [22] Black Forest Labs. Flux.1 [dev]. <https://huggingface.co/black-forest-labs/FLUX.1-dev>, 2023. Hugging Face model card; Accessed: 2025-11-12. 1
- [23] Black Forest Labs. Flux. <https://github.com/black-forest-labs/flux>, 2024. 1, 7
- [24] Black Forest Labs, Stephen Batifol, Andreas Blattmann, Frederic Boesel, Saksham Consul, Cyril Diagne, Tim Dockhorn, Jack English, Zion English, Patrick Esser, Sumith Kulal, Kyle Lacey, Yam Levi, Cheng Li, Dominik Lorenz, Jonas Müller, Dustin Podell, Robin Rombach, Harry Saini, Axel Sauer, and Luke Smith. Flux.1 kon-text: Flow matching for in-context image generation and editing in latent space, 2025. 1
- [25] Liangqi Lei, Keke Gai, Jing Yu, and Liehuang Zhu. Diffustrace: A transparent and flexible watermarking scheme for latent diffusion model. *arXiv preprint arXiv:2405.02696*, 2024. 1
- [26] Xinyu Li. Diffwa: Diffusion models for watermark attack. In *2023 International Conference on Integrated Intelligence and Communication Systems (ICIICS)*, pages 1–8. IEEE, 2023. 1

- [27] Zhuoling Li, Haoxuan Qu, Jason Kuen, Jiuxiang Gu, Qihong Ke, Jun Liu, and Hossein Rahmani. Diffip: Representation fingerprints for robust ip protection of diffusion models. In *ICCV*, pages 17035–17045, 2025. 2
- [28] Thibault Maho, Teddy Furon, and Erwan Le Merrer. Model fingerprinting with benign inputs. In *ICASSP 2023-2023 IEEE International Conference on Acoustics, Speech and Signal Processing (ICASSP)*, pages 1–5. IEEE, 2023. 2
- [29] Liam Daly Manocchio, Siamak Layeghy, Wai Weng Lo, Gayan K Kulatilleke, Mohanad Sarhan, and Marius Portmann. Flowtransformer: A transformer framework for flow-based network intrusion detection systems. *Expert Systems with Applications*, 241:122564, 2024. 7
- [30] Andreas Müller, Denis Lukovnikov, Jonas Thietke, Asja Fischer, and Erwin Quiring. Black-box forgery attacks on semantic watermarks for diffusion models. In *CVPR*, pages 20937–20946, 2025. 1
- [31] Jianmo Ni, Gustavo Hernandez Abrego, Noah Constant, Ji Ma, Keith Hall, Daniel Cer, and Yinfei Yang. Sentence-t5: Scalable sentence encoders from pre-trained text-to-text models. In *Findings of the association for computational linguistics: ACL 2022*, pages 1864–1874, 2022. 7
- [32] Long Ouyang, Jeffrey Wu, Xu Jiang, Diogo Almeida, Carroll Wainwright, Pamela Mishkin, Chong Zhang, Sandhini Agarwal, Katarina Slama, Alex Ray, et al. Training language models to follow instructions with human feedback. *NeurIPS*, 35:27730–27744, 2022. 7
- [33] Jeongsoo Park and Andrew Owens. Community forensics: Using thousands of generators to train fake image detectors. In *Proceedings of the Computer Vision and Pattern Recognition Conference*, pages 8245–8257, 2025. 2
- [34] William Peebles and Saining Xie. Scalable diffusion models with transformers. In *ICCV*, pages 4195–4205, 2023. 7, 1
- [35] Wenjun Peng, Jingwei Yi, Fangzhao Wu, Shangxi Wu, Bin Bin Zhu, Lingjuan Lyu, Binxing Jiao, Tong Xu, Guangzhong Sun, and Xing Xie. Are you copying my model? protecting the copyright of large language models for eaas via backdoor watermark. In *Proceedings of the 61st Annual Meeting of the Association for Computational Linguistics (Volume 1: Long Papers)*, pages 7653–7668, 2023. 2
- [36] Dustin Podell, Zion English, Kyle Lacey, Andreas Blattmann, Tim Dockhorn, Jonas Müller, Joe Penna, and Robin Rombach. Sdxl: Improving latent diffusion models for high-resolution image synthesis. *arXiv preprint arXiv:2307.01952*, 2023. 1, 7
- [37] James Pustejovsky. The semantics of lexical underspecification. *Folia linguistica*, 51(s1000):1–25, 2017. 5
- [38] Alec Radford, Jong Wook Kim, Chris Hallacy, Aditya Ramesh, Gabriel Goh, Sandhini Agarwal, Girish Sastry, Amanda Askell, Pamela Mishkin, Jack Clark, et al. Learning transferable visual models from natural language supervision. In *ICML*, pages 8748–8763. Pmlr, 2021. 3, 5, 7
- [39] Rafael Rafailov, Archit Sharma, Eric Mitchell, Christopher D Manning, Stefano Ermon, and Chelsea Finn. Direct preference optimization: Your language model is secretly a reward model. *NeurIPS*, 36:53728–53741, 2023. 2, 7, 1
- [40] Aditya Ramesh, Mikhail Pavlov, Gabriel Goh, Scott Gray, Chelsea Voss, Alec Radford, Mark Chen, and Ilya Sutskever. Zero-shot text-to-image generation. In *ICML*, pages 8821–8831. Pmlr, 2021. 2
- [41] Anton Razzhigaev, Arseniy Shakhmatov, Anastasia Maltseva, Vladimir Arkhipkin, Igor Pavlov, Ilya Ryabov, Angelina Kuts, Alexander Panchenko, Andrey Kuznetsov, and Denis Dimitrov. Kandinsky: an improved text-to-image synthesis with image prior and latent diffusion. *arXiv preprint arXiv:2310.03502*, 2023. 1, 7
- [42] Ahmad Rezaei, Mohammad Akbari, Saeed Ranjbar Alvar, Arezou Fatemi, and Yong Zhang. Lawa: Using latent space for in-generation image watermarking. In *ECCV*, pages 118–136. Springer, 2024. 2
- [43] Robin Rombach, Andreas Blattmann, Dominik Lorenz, Patrick Esser, and Björn Ommer. High-resolution image synthesis with latent diffusion models. In *CVPR*, pages 10684–10695, 2022. 1, 7
- [44] Olaf Ronneberger, Philipp Fischer, and Thomas Brox. U-net: Convolutional networks for biomedical image segmentation. In *International Conference on Medical image computing and computer-assisted intervention*, pages 234–241. Springer, 2015. 7
- [45] Bitá Darvish Rouhani, Huili Chen, and Farinaz Koushanfar. Deepsigns: A generic watermarking framework for ip protection of deep learning models. *arXiv preprint arXiv:1804.00750*, 2018. 2
- [46] Christoph Schuhmann, Romain Beaumont, Richard Vencu, Cade Gordon, Ross Wightman, Mehdi Cherti, Theo Coombes, Aarush Katta, Clayton Mullis, Mitchell Wortsman, et al. Laion-5b: An open large-scale dataset for training next generation image-text models. *NeurIPS*, 35:25278–25294, 2022. 3, 7, 8, 1
- [47] Gowthami Somepalli, Vasu Singla, Micah Goldblum, Jonas Geiping, and Tom Goldstein. Diffusion art or digital forgery? investigating data replication in diffusion models. In *CVPR*, pages 6048–6058, 2023. 2
- [48] Hae Jin Song and Laurent Itti. Riemannian-geometric fingerprints of generative models. In *Proceedings of the IEEE/CVF International Conference on Computer Vision*, pages 11425–11435, 2025. 2
- [49] Yuchen Sun, Tianpeng Liu, Panhe Hu, Qing Liao, Shaojing Fu, Nenghai Yu, Deke Guo, Yongxiang Liu, and Li Liu. Deep intellectual property protection: A survey. *arXiv preprint arXiv:2304.14613*, 2023. 2
- [50] Sebastian Szyller, Buse Gul Atli, Samuel Marchal, and N Asokan. Dawn: Dynamic adversarial watermarking of neural networks. In *Proceedings of the 29th ACM international conference on multimedia*, pages 4417–4425, 2021. 2
- [51] Huan Teng, Yuhui Quan, Chengyu Wang, Jun Huang, and Hui Ji. Fingerprinting denoising diffusion probabilistic models. In *CVPR*, pages 28811–28820, 2025. 8

- [52] Antonio Torralba and Alexei A Efros. Unbiased look at dataset bias. In *CVPR 2011*, pages 1521–1528. IEEE, 2011. [3](#), [8](#)
- [53] Subarna Tripathi et al. Paladin: Robust neural fingerprinting for text-to-image diffusion models. *arXiv preprint arXiv:2506.03170*, 2025. [2](#)
- [54] Zhendong Wang, Jianmin Bao, Wengang Zhou, Weilun Wang, Hezhen Hu, Hong Chen, and Houqiang Li. Dire for diffusion-generated image detection. In *Proceedings of the IEEE/CVF International Conference on Computer Vision*, pages 22445–22455, 2023. [2](#)
- [55] Zilan Wang, Junfeng Guo, Jiacheng Zhu, Yiming Li, Heng Huang, Muhao Chen, and Zhengzhong Tu. Sleep-ermark: Towards robust watermark against fine-tuning text-to-image diffusion models. In *CVPR*, pages 8213–8224, 2025. [1](#), [2](#)
- [56] Yuxin Wen, John Kirchenbauer, Jonas Geiping, and Tom Goldstein. Tree-ring watermarks: Fingerprints for diffusion images that are invisible and robust. *arXiv preprint arXiv:2305.20030*, 2023. [1](#), [2](#)
- [57] Dongxian Wu and Yisen Wang. Adversarial neuron pruning purifies backdoored deep models. *Advances in Neural Information Processing Systems*, 34:16913–16925, 2021. [2](#)
- [58] Zijin Yang, Kai Zeng, Kejiang Chen, Han Fang, Weiming Zhang, and Nenghai Yu. Gaussian shading: Provable performance-lossless image watermarking for diffusion models. In *CVPR*, pages 12162–12171, 2024. [2](#)
- [59] Jie Zhang, Dongrui Liu, Chen Qian, Linfeng Zhang, Yong Liu, Yu Qiao, and Jing Shao. Reef: Representation encoding fingerprints for large language models. *arXiv preprint arXiv:2410.14273*, 2024. [2](#), [8](#)
- [60] Lijun Zhang, Xiao Liu, Antoni V Martin, Cindy X Bearfield, Yuriy Brun, and Hui Guan. Attack-resilient image watermarking using stable diffusion. *NeurIPS*, 37: 38480–38507, 2024. [1](#)
- [61] Xuandong Zhao, Prabhanjan Ananth, Lei Li, and Yu-Xiang Wang. Provable robust watermarking for ai-generated text. *arXiv preprint arXiv:2306.17439*, 2023. [2](#)
- [62] Yunqing Zhao, Tianyu Pang, Chao Du, Xiao Yang, Ngai-Man Cheung, and Min Lin. A recipe for watermarking diffusion models. *arXiv preprint arXiv:2303.10137*, 2023. [1](#), [2](#)
